# Supplementary material for: The past, present, and future for constitutional ring chromosomes: A report of the international consortium for human ring chromosomes
Source: PubMed Central journal article supplement (PMC9519620; doi:10.1016/j.xhgg.2022.100139), 2022-09-10
Supplement: mmc1.pdf [file mmc1.pdf]

**HGGA, Volume 3**

**Supplemental information**

**The past, present, and future for constitutional  
ring chromosomes: A report of the international  
consortium for human ring chromosomes**

**Peining Li, Barbara Dupont, Qiping Hu, Marco Crimi, Yiping Shen, Igor  
Lebedev, and Thomas Liehr**

## **Supplemental Information**

### **The Past, Present, and Future for Constitutional Ring Chromosomes: A Report of the International Consortium for Human Ring Chromosomes (ICHRC)**

**Peining Li, Barbara Dupont, Qiping Hu, Marco Crimi, Yiping Shen, Igor Lebedev, Thomas Liehr**

#### **Supplementary Tables**

Table S1. List of Case Reports of Ring Chromosomes in PubMed 1962-2022

Table S2: Relative Frequency of Constitutional Ring Chromosomes (RCs) and Cytogenomic Findings in PubMed 1962-2022

Table S1. List of Case Reports of Ring Chromosomes in PubMed 1962-2022

| Case Count | Case Report       | Age Onset  |        | Nature History       | Karyotype                                                                                                                                         | PMID     | Title                                                                                                                                                         | Authors                                                                                                                             | Citation                                                                          | Publication Year |
|------------|-------------------|------------|--------|----------------------|---------------------------------------------------------------------------------------------------------------------------------------------------|----------|---------------------------------------------------------------------------------------------------------------------------------------------------------------|-------------------------------------------------------------------------------------------------------------------------------------|-----------------------------------------------------------------------------------|------------------|
|            |                   | Diagnosis  | Gender |                      |                                                                                                                                                   |          |                                                                                                                                                               |                                                                                                                                     |                                                                                   |                  |
| 1          | RC1-1             | 3 m        | F      | na                   | 46,XX,r(1)[71]/46,XX[7]                                                                                                                           | 14215563 | RING-1 CHROMOSOME AND MICROCEPHALIC DWARFISM                                                                                                                  | GORDON RR, COOKE P.                                                                                                                 | Lancet. 1964 Dec 5;2(7371):1212-3. doi: 10.1016/s0140-6736(64)91045-              | 1964             |
| 1          | RC1-2             | 8 m        | F      | na                   | 46,XX,r(1)                                                                                                                                        | 6054759  | Ring 1 chromosome and dwarfism—a possible syndrome                                                                                                            | Wolf CB, Peterson JA, LoGrippe GA, Weiss L.                                                                                         | J Pediatr. 1967 Nov;71(5):719-22. doi: 10.1016/s0022-3476(67)80211-               | 1967             |
| 1          | RC1-3             | 6 m        | F      | na                   | d. 10 y<br>BL: 46,XX,r(1)<br>BM: 47,XX,der(1),+mar                                                                                                | 4125054  | Ring-1 chromosome, microcephalic dwarfism, and acute myeloid leukemia                                                                                         | Bobrow M, Emerson PM, Spriggs AI, Ellis HL.                                                                                         | Am J Dis Child. 1973 Aug;126(2):257-1973 60. doi:                                 | 1973             |
| 1          | RC1-4             | 2 m        | F      | de novo              | BL: 46,XX,r(1)[80]/46,XX[10]/r-var[10]<br>SF: 46,XX,r(1)[28]/46,XX[2]                                                                             | 679524   | Apparently non-deleted ring-1 chromosome and extreme growth failure in a mentally retarded girl                                                               | Kjessler B, Gustavson KH, Wigertz A.                                                                                                | Clin Genet. 1978 Jul;14(1):8-15. doi: 10.1111/j.1399-                             | 1978             |
| 1          | RC1-5             | nb         | F      | de novo              | 46,XX,r(1)                                                                                                                                        | 6502659  | Ring chromosome 1 associated with radial ray defect                                                                                                           | Gardner RJ, Grindley RM, Chewings WE, Clarkson JE.                                                                                  | J Med Genet. 1984 Oct;21(5):400. doi: 10.1136/jmg.21.5.400.                       | 1984             |
| 1          | RC1-6             | nb         | F      | nd                   | BL: 46,XX,r(1)[p36.3q44]/r-var[2/80]<br>SF: 45,XX,psu dic<br>der(16;1)(16;1;20)[p11.2;q41p12;p11.2],der(20)t(16;1;20)[45]/46,XX,r(1)[p36.3q44][5] | 10826627 | Ring chromosome 1 in a newborn                                                                                                                                | Cutenese C, Mullett M, Hummel M, Wenger SL.                                                                                         | Clin Dysmorphol. 2000 Apr;9(2):131-2000 3. doi: 10.1097/00019605-200009020-00012. | 2000             |
| 1          | RC1-7             | 3 y        | M      | de novo              | 46,XY,r(1)[p36.3q44][10]/45,XY-1[5]                                                                                                               | 27099748 | A patient with constitutional ring 1 chromosome characterized by SNP array CGH                                                                                | Saliganan S, Lee J, Wei S.                                                                                                          | Clin Case Rep. 2016 Mar 21;4(4):442-8. doi:                                       | 2016             |
| <b>7</b>   | <b>7</b>          |            |        |                      |                                                                                                                                                   |          |                                                                                                                                                               |                                                                                                                                     |                                                                                   |                  |
| 1          | RC2-1             |            | F      |                      | 46,XX/46,XX,r(2)[p25q37]                                                                                                                          | 315192   | 46,XX/46,XX,r(2)[p25q37] mosaicism: clinical and cytogenetic studies                                                                                          | Sutherland GR, Carter RF.                                                                                                           | Ann Genet. 1978 Sep;21(3):164-7.                                                  | 1978             |
| 1          | RC2-2 case 1      | 1.25 y     | M      | de novo              | 46,XY,r(2)                                                                                                                                        | 457140   | Three cases of ring chromosome 2, one derived from a paternal 2/6 translocation                                                                               | Maraschio P, Danesino C, Garau A, Saputo V, Vigi V, Volpato S.                                                                      | Hum Genet. 1979 Apr 27;48(2):157-67. doi: 10.1007/BF00286899.                     | 1979             |
| 1          | RC2-2 case 2      | 10 m       | F      | r(2;6) der t(2;6)pat | Proband: 46,XX,r(2;6)<br>Pat: 46,XY,t(2;6)(p15;q15)                                                                                               | 457140   |                                                                                                                                                               |                                                                                                                                     |                                                                                   |                  |
| 1          | RC2-2 case 3      | 6 m        | M      | de novo              | d. 10.5 m<br>46,XY,r(2)                                                                                                                           | 457140   |                                                                                                                                                               |                                                                                                                                     |                                                                                   |                  |
| 1          | RC2-3             | 1.5 y      | F      | de novo              | 46,XX,r(2)[311]/46,XX[64]/r-var[4]                                                                                                                | 7468662  | Ring chromosome 2 in a child with growth failure and few congenital abnormalities                                                                             | Vigfusson NV, Kapstafer KJ, Lloyd MA.                                                                                               | Am J Med Genet. 1980;7(3):383-9. doi: 10.1002/ajmg.1320070321.                    | 1980             |
| 1          | RC2-4             | 1.5 y      | F      | de novo              | > 35 y<br>46,XX,r(2)[p25q37]196]/r-var[29]                                                                                                        | 6977305  | The cytogenetic and clinical implications of a ring chromosome 2                                                                                              | Cote GB, Katsantoni A, Deligeorgis D.                                                                                               | Ann Genet. 1981;24(4):231-5.                                                      | 1981             |
| 0          | RC2-4 (follow-up) |            |        |                      |                                                                                                                                                   | 25997743 | 35-Year Follow-Up of a Case of Ring Chromosome 2: Array-CGH Analysis and Literature Review of the Ring Syndrome                                               | Sarri C, Douzgos S, Kontos H, Anagnostopoulou K, Tümer Z, Grigoriadou M, Petersen MB, Kokotas H, Merou K, Pandelia E, Giouroukou E, | Cytogenet Genome Res. 2015;145(1):6-13. doi: 10.1159/000382046. Epub 2015 May 14. | 2015             |
| 1          | RC2-5             | 4 y        | F      | de novo              | 46,XX,r(2)[p25q37]                                                                                                                                | 7076252  | Ring chromosome 2: clinical, chromosomal, and biochemical aspects                                                                                             | Jansen M, Beemer FA, van der Heiden C, Van Hemel JO, Van den Brande JL.                                                             | Hum Genet. 1982;60(1):91-5. doi: 10.1007/BF00281274.                              | 1982             |
| 1          | RC2-6             | nb         | M      |                      | 46,XY,r(2)[p25q37.3][0.65]/45,XY,-2[0.27]/46,XY[0.02]                                                                                             | 10406663 | Ring 2 chromosome: ten-year follow-up report                                                                                                                  | Lacassie Y, Arriaza MI, Vargas A, La Motta I.                                                                                       | Am J Med Genet. 1999 Jul 16;85(2):117-22. doi: 10.1002/(sic)1096-                 | 1999             |
| 1          | RC2-7             | nb         | F      | de novo              | 46,XX,r(2)[p25q37][79]/45,XX,-2[4]/r-var[17]                                                                                                      | 11546833 | A case of ring chromosome 2 with growth retardation, mild dysmorphism, and microdeletion of 2p detected using FISH                                            | Dee SL, Clark AT, Willatt LR, Yates JR.                                                                                             | J Med Genet. 2001 Sep;38(9):E32. doi: 10.1136/jmg.38.9.e32.                       | 2001             |
| 1          | RC2-8             |            | F      |                      | 46,XX,r(2)[p25.3q37.3].ish r(2)[2pter+,2qtel+]                                                                                                    | 15844781 | "Ring syndrome" involving chromosome 2 confirmed by FISH analysis using chromosome-specific subtelomeric probes                                               | Kosho T, Matsushima K, Sahashi T, Mitsui N, Fukushima Y, Sobajima H, Ohashi H.                                                      | Genet Couns. 2005;16(1):65-70.                                                    | 2005             |
| 1          | RC2-9             | nb         | M      |                      | 46,XY,r(2)[p25q37][13]/45,XY,del[4]/47,XY,r(2)[p25q37]x2[2]/46,XY,dic r(2;2)[p25q37;p25q37][1]                                                    | 15580637 | A patient with a ring chromosome 2 and microdeletion of 2q detected using FISH: Further support for "ring chromosome 2 syndrome"                              | Alkuraya FS, Kimonis VE, Holt L, Murata-Collins JL.                                                                                 | Am J Med Genet A. 2005 Feb 1;132A(4):447-9. doi: 10.1002/ajmg.a.30437.            | 2005             |
| 1          | RC2-10            | pn, 23 gwk | M      | de novo              | top<br>46,XY,r(2)[p25.3q37.3]                                                                                                                     | 23403238 | Prenatal diagnosis of ring chromosome 2 with lissencephaly and 2p25.3 and 2q37.3 microdeletions detected using array comparative genomic hybridization        | Chen CP, Lin CJ, Chang TY, Chern SR, Wu PS, Chen YT, Su JW, Lee CC, Chen LF, Wang W.                                                | Gene. 2013 Apr 25;519(1):164-8. doi: 10.1016/j.gene.2013.01.055. Epub 2013 Feb 9. | 2013             |
| 1          | RC2-11            | 10 m       | M      | de novo              | 46,XY,r(2)[p25q37][17]/47,XY,r(2),+r(2)[3]/46,XY[1]                                                                                               | 23895799 | Ring 2 chromosome associated with failure to thrive, microcephaly and dysmorphic facial features                                                              | López-Uriarte A, Quintero-Rivera F, de la Fuente Cortez B, Puente VG, Campos Mdel R, de Villarreal LE.                              | Gene. 2013 Oct 15;529(1):65-8. doi: 10.1016/j.gene.2013.06.056. Epub 2013 Jul 27. | 2013             |
| 1          | RC2-12            | nb         | M      | de novo              | 46,XY,r(2)[p25.3q37.3][92]/r-var[8]                                                                                                               | 25774222 | Clinico-radiological and molecular characterization of a child with ring chromosome 2 presenting growth failure, microcephaly, kidney and brain malformations | Severino M, Accogli A, Gimelli G, Rossi A, Kotzeva S, Di Rocco M, Ronchetto P, Cuoco C, Tassano E.                                  | Mol Cytogenet. 2015 Mar 5;8:17. doi: 10.1186/s13039-015-0121-z. eCollection 2015. | 2015             |
| <b>14</b>  | <b>13</b>         |            |        |                      |                                                                                                                                                   |          |                                                                                                                                                               |                                                                                                                                     |                                                                                   |                  |
| 1          | RC3-1             | nb         | M      | de novo              | 46,XY,r(3)                                                                                                                                        | 669717   | Ring chromosome 3 in a retarded boy                                                                                                                           | Witkowski R, Ullrich E, Piede U.                                                                                                    | Hum Genet. 1978 Jun 27;42(3):345-8. doi: 10.1007/BF00291318.                      | 1978             |

|   |        |      |   |         |                                                         |          |                                                                                                                                    |                                                                                                       |                                                                               |      |
|---|--------|------|---|---------|---------------------------------------------------------|----------|------------------------------------------------------------------------------------------------------------------------------------|-------------------------------------------------------------------------------------------------------|-------------------------------------------------------------------------------|------|
| 1 | RC3-2  | 2 m  | M | nl mat  | 46,XY,r(3)(p26q29)[0.92BL/0.905F]                       | 7154048  | The phenotype of ring chromosome 3                                                                                                 | Wilson GN, Pooley J, Parker J.                                                                        | J Med Genet. 1982 Dec;19(6):471-3. doi: 10.1136/jmg.19.6.471.                 | 1982 |
| 1 | RC3-3  | 10 m | F | de novo | 46,XX,r(3)(p26q29)[223]/46,XX[10]/r-var[55]             | 6513151  | A case of ring chromosome 3, 46,XX,-3,+r(3)(p26q29)                                                                                | Kitatani M, Takahashi H, Yasuda J, Chen CC, Ida F, Shike S.                                           | Jinrui Idengaku Zasshi. 1984 Jun;29(2):157-62. doi: 10.1007/BF01873537.       | 1984 |
| 1 | RC3-4  | 4 m  | M | de novo | 46,XY,r(3)                                              | 2359108  | Cornelia de Lange syndrome with ring chromosome 3                                                                                  | Lakshminarayana P, Nallasivam P.                                                                      | J Med Genet. 1990 Jun;27(6):405-6. doi: 10.1136/jmg.27.6.405.                 | 1990 |
| 0 | RC3-4  |      |   |         |                                                         | 2002489  | Cornelia de Lange syndrome with ring chromosome 3                                                                                  | Wilson GN.                                                                                            | J Med Genet. 1991 Feb;28(2):143. doi: 10.1136/jmg.28.2.143.                   | 1991 |
| 1 | RC3-5  | 46 y | M | > 46 y  | 46,XX,r(3)(p26q29)[0.93]                                | 1952790  | [Ring chromosome 3 in a mentally retarded adult dwarf]                                                                             | Teyssier M, Piperno D, Charrin C.                                                                     | Ann Genet. 1991;34(1):33-6.                                                   | 1991 |
| 1 | RC3-6  | 18 y | F | de novo | 46,XX,r(3)(p26q29)                                      | 1920370  | De novo ring chromosome 3: a new case with a mild phenotype                                                                        | McKinley M, Colley A, Sinclair P, Donnai D, Andrews T.                                                | J Med Genet. 1991 Aug;28(8):536-8. doi: 10.1136/jmg.28.8.536.                 | 1991 |
| 1 | RC3-7  | 4 y  | F | > 23 y  | 47,XX,-3,+r(3)(p21.3q25),+rea(3)[76]/46,XX[16]/r-var[6] | 8786088  | A novel mechanism for the origin of supernumerary marker chromosomes                                                               | Maraschio P, Tupler R, Rossi E, Barbierato L, Uccellatore F, Rocchi M, Zuffardi O, Fraccaro M.        | Hum Genet. 1996 Mar;97(3):382-6. doi: 10.1007/BF02185778.                     | 1996 |
| 1 | RC3-8  |      | F | de novo | 46,XX,r(3)(p26q29)                                      | 11491310 | De novo ring chromosome 3 in a girl with hypoplastic thumb and coloboma of iris                                                    | Barajas-Barajas LO, Velarde-Félix S, Elizarrarás-Rivas J, Hernández-Zaragoza                          | Genet Couns. 2001;12(2):151-6.                                                | 2001 |
| 1 | RC3-9  | 8 m  | M |         | 46,XY,r(3)(p26.1q29)                                    | 21849783 | Clinical, cytogenetic and molecular study in a case of r(3) with 3p deletion and review of the literature                          | Guilherme RS, Bragagnolo S, Pellegrino R, Christofolini DM, Takeno SS, Carvolheira GM, Kulikowski LD, | Cytogenet Genome Res. 2011;134(4):325-30. doi: 10.1159/000329478. Epub 2011   | 2011 |
| 1 | RC3-10 | 4 m  | F | de novo | 46,XX,r(3)(p26q29)[90]/47,XX,+2r(3)[5]/46,X X,der(3)[5] | 27077748 | Chromosome r(3)(p25.3q29) in a Patient with Developmental Delay and Congenital Heart Defects: A Case Report and a Brief Literature | Zhang K, Song F, Zhang D, Liu Y, Zhang H, Wang Y, Dong R, Zhang Y, Liu Y, Gai Z.                      | Cytogenet Genome Res. 2016;148(1):6-13. doi: 10.1159/000445273. Epub 2016 Apr | 2016 |
| 0 | RC3-10 |      |   |         |                                                         | 27984612 | [Molecular cytogenetic analysis of a case with ring chromosome 3 syndrome]                                                         | Zhang K, Song F, Zhang D, Zhang H, Wang Y, Dong R, Zhang Y, Liu Y, Gai Z.                             | Zhonghua Yi Xue Yi Chuan Xue Za Zhi. 2016 Dec 10;33(6):816-819.               | 2016 |
| 1 | RC3-11 |      |   |         |                                                         | 32090537 | A rare case of ring chromosome 3 syndrome                                                                                          | Huang T, Zhu L, Zhang SF, Hu XY, Cheng P, Luan SQ, Chen GH.                                           | J Biol Regul Homeost Agents. 2020 Feb 24;34(1). doi: 10.23812/19-277-         | 2020 |

**11 12**

|   |        |       |   |         |         |                                                 |         |                                                                                                                             |                                                                                          |                                                                                    |      |
|---|--------|-------|---|---------|---------|-------------------------------------------------|---------|-----------------------------------------------------------------------------------------------------------------------------|------------------------------------------------------------------------------------------|------------------------------------------------------------------------------------|------|
| 1 | RC4-1  | nb    | M | de novo | d. 4 w  | 46,XY,r(4)[165/200]                             | 5801472 | Congenital malformations associated with a ring 4 chromosome                                                                | Carter R, Baker E, Hayman D.                                                             | J Med Genet. 1969 Jun;6(2):224-7. doi: 10.1136/jmg.6.2.224.                        | 1969 |
| 1 | RC4-2  | 9 m   | F | de novo |         | 46,XX,r(4)                                      | 5149537 | A ring-4 chromosome in a patient with normal intelligence and short stature                                                 | Surana RB, Bailey JD, Conen PE.                                                          | J Med Genet. 1971 Dec;8(4):517-21. doi: 10.1136/jmg.8.4.517.                       | 1971 |
| 1 | RC4-3  | 9 m   | F | de novo |         | 46,XX/46,XX,r(4)[0.09/0.58/0.64/0.72]age2/3/5/9 | 4411581 | A child with a ring-4 chromosome (46,XX-46,XX,r 4)                                                                          | Parker CE, Alfi OS, Derencsenyi A, Mavalwala J, Donnell G.                               | Am J Dis Child. 1974 Sep;128(3):371-4. doi: 10.1001/archpedi.1974.02110280101015.  | 1974 |
| 1 | RC4-4  | 8 y   | M | de novo |         | 46,XY,r(4)[0.90]                                | 1150264 | Derivative chromosomal structures from a ring chromosome 4                                                                  | Niss R, Passarge E.                                                                      | Humangenetik. 1975 May 26;28(1):9-23. doi: 10.1007/BF00272478.                     | 1975 |
| 0 | RC4-4  | 12 y  |   |         |         |                                                 | 872629  | Sister chromatid exchanges in a ring chromosome 4                                                                           | Bartram CR.                                                                              | Cytogenet Cell Genet. 1977;18(4):238-41. doi: 10.1159/000130766.                   | 1977 |
| 1 | RC4-6  | 1.5 y | M | de novo |         | 46,XY,r(4)(p16q35)                              | 881718  | Ring chromosome 4                                                                                                           | McDermott A, Voyce MA, Romain D.                                                         | J Med Genet. 1977 Jun;14(3):228-32. doi: 10.1136/jmg.14.3.228.                     | 1977 |
| 1 | RC4-7  | nb    | M | de novo | d. 1 wk | 46,XY,r(4)(p15q35)[100]/r-var[23]               | 881198  | Ring chromosome 4 and Wolf syndrome                                                                                         | Pérez-Castillo A, Abrisqueta JA.                                                         | Hum Genet. 1977 Jun 10;37(1):87-91. doi: 10.1007/BF00293777.                       | 1977 |
| 1 | RC4-8  | nb    | F | de novo | d. 4 d  | 46,XX,r(4)(p16q35)[87]/r-var[13]                | 711237  | Partial deletion of 4p16 band in a ring chromosome and Wolf Syndrome                                                        | del Mazo J, Abrisqueta JA, Pérez-Castillo A, Aller V, Lucas MA, de Torres ML, Martín MJ. | Hum Genet. 1978 Oct 19;44(1):105-8. doi: 10.1007/BF00283580.                       | 1978 |
| 1 | RC4-9  | nb    | F |         | d. 6 y  | 46,XX,r(4)                                      | 7205435 | Neurological and neuropathological findings in ring chromosome 4                                                            | Young RS, Zalneraitis EL.                                                                | J Med Genet. 1980 Dec;17(6):487-90. doi: 10.1136/jmg.17.6.487.                     | 1980 |
| 1 | RC4-10 | 2 m   | M | de novo |         | 46,XY,r(4)(p16q35)[0.77]                        | 7270516 | Ring 4 chromosome with terminal p and q deletions                                                                           | Finley WH, Finley SC, Chonmaitree T, Koors JE, Chandler WC.                              | Am J Dis Child. 1981 Aug;135(8):729-31. doi: 10.1001/archpedi.1981.02130320043015. | 1981 |
| 1 | RC4-11 | 1.5 y | F |         |         | 46,XX,r(4)                                      | 4041283 | Ring chromosome 4: Wolf syndrome and unspecific developmental anomalies                                                     | Kosztolányi G.                                                                           | Acta Paediatr Hung. 1985;26(2):157-65.                                             | 1985 |
| 0 | RC4-11 |       |   |         |         |                                                 | 3674110 | Decreased cell viability of fibroblasts from two patients with a ring chromosome: an in vitro reflection of growth failure? | Kosztolányi G.                                                                           | Am J Med Genet. 1987 Sep;28(1):181-4. doi: 10.1002/ajmg.1320280125.                | 1987 |
| 1 | RC4-12 | 12 y  | M |         |         | 46,XY,r(4)(p16q35)                              | 4046483 | Ring chromosome 4 : 46,XY, r(4) (p16q35) in a boy                                                                           | Gutkowska A, Krajewska-Walasek M, Wiśniewski L.                                          | Klin Padiatr. 1985 Jul-Aug;197(4):294-6. doi: 10.1055/s-2008-1033986.              | 1985 |

|   |        |             |   |         |                                                                      |                                                          |                                                                                                                                                   |                                                                                                                                      |                                                                                         |                                                                                |      |
|---|--------|-------------|---|---------|----------------------------------------------------------------------|----------------------------------------------------------|---------------------------------------------------------------------------------------------------------------------------------------------------|--------------------------------------------------------------------------------------------------------------------------------------|-----------------------------------------------------------------------------------------|--------------------------------------------------------------------------------|------|
| 1 | RC4-13 | 11 m        | M |         | 46,XY,r(4)(p16q35)                                                   | 3671134                                                  | [Ring chromosome 4 in twins]                                                                                                                      | Giuffrè L, Cammarata M, Corsello G, Benigno V, Graziano L, Roccella F,                                                               | Pediatr Med Chir. 1987 May-Jun;9(3):349-50.                                             | 1987                                                                           |      |
| 1 | RC4-14 | nb          | M |         | 46,XY/46,XY,r(4)                                                     | 3261147                                                  | Ring chromosome 4 mosaicism and Potter sequence                                                                                                   | Fryns JP, Kleczkowska A, Jaeken J, Van den Berghe H.                                                                                 | Ann Genet. 1988;31(2):120-2.                                                            | 1988                                                                           |      |
| 1 | RC4-16 | nb          | F | de novo | 46,XX,r(4)(p16q35)[81]/45,XX,-4[12]/r-var[2]                         | 2240048                                                  | Ring chromosome 4 in a child with duodenal atresia                                                                                                | Halal F, Vekemans M.                                                                                                                 | Am J Med Genet. 1990 Sep;37(1):79-82. doi: 10.1002/ajmg.1320370118.                     | 1990                                                                           |      |
| 1 | RC4-17 | 8 y         | M | de novo | 46,XY,r(4)(p16q35)[72]/45,XY,-4[3]/r-var[25]                         | 2015696                                                  | Ring chromosome 4 in a child with mild dysmorphic signs                                                                                           | Freyberger G, Wamsler C, Schmid M.                                                                                                   | Clin Genet. 1991 Feb;39(2):151-5. doi: 10.1111/j.1399-0004.1991.tb03003.x.              | 1991                                                                           |      |
| 1 | RC4-18 | nb          | F | de novo | 46,XX[0.84]/46,XX,r(4)(p16q22.3)[0.12]/47,Xr(4),+del(4)(q22.3)[0.04] | 8933346                                                  | Amelia, dextrocardia, asplenia, and congenital short bowel in deleted ring chromosome 4                                                           | Hou JW, Wang TR.                                                                                                                     | J Med Genet. 1996 Oct;33(10):879-81. doi: 10.1136/jmg.33.10.879.                        | 1996                                                                           |      |
| 1 | RC4-19 | nb          | M | de novo | > 26 y                                                               | 46,XY,r(4)(p16.3q35)[9]/46,XY[11]                        | 9332654                                                                                                                                           | Ring chromosome 4 mosaicism coincidence of oligomeganephronia and signs of Seckel syndrome                                           | Anderson CE, Wallerstein R, Zamerowski ST, Witzleben C, Hoyer JR,                       | Am J Med Genet. 1997 Oct 31;72(3):281-5.                                       | 1997 |
| 1 | RC4-20 | pn: 17 gwks | F | top     | 46,XX,r(4)[0.44]/45,XX,-4[0.56]                                      | 12011164                                                 | Partial deletion of 4p and 4q in a fetus with ring chromosome 4: phenotype and molecular mapping of the breakpoints                               | Kocks A, Endeles S, Heller R, Schröder B, Schäfer HJ, Städtler C, Makrigeorgi-Butera M, Winterpacht A.                               | J Med Genet. 2002 May;39(5):E23. doi: 10.1136/jmg.39.5.e23.                             | 2002                                                                           |      |
| 1 | RC4-21 | 27 y        | F | de novo | > 27 y                                                               | 46,XX,r(4)(p16q35)[160]/45,XX,-4[16]/r-var[17]/46,XX[21] | 16103661                                                                                                                                          | Molecular cytogenetic characterization of ring chromosome 4 in a female having a chromosomally normal child                          | Lee MH, Park SY, Kim YM, Kim JM, Yoo KJ, Lee HH, Ryu HM.                                | Cytogenet Genome Res. 2005;111(2):175-8. doi: 10.1159/000086389.               | 2005 |
| 1 | RC4-22 | 2.5 y       | F | de novo | > 26 y                                                               | 46,XX,r(4)(p16q35)                                       | 16082703                                                                                                                                          | Ring chromosome 4 in a patient with early onset type 2 diabetes, deafness, and developmental                                         | Blackett PR, Li S, Mulvihill JJ.                                                        | Am J Med Genet A. 2005 Aug 30;137(2):213-6. doi: 10.1002/ajmg.a.31900.         | 2005 |
| 1 | RC4-23 |             |   |         |                                                                      | 16719275                                                 | Wolf Hirschhorn syndrome in a case of ring chromosome 4: phenotype and molecular cytogenetic findings                                             | Laleye A, Alao MJ, Adjagba M, Hans C, Delneste D, Gnamey DK, Ayivi B, Darboux RB.                                                    | Genet Couns. 2006;17(1):35-40.                                                          | 2006                                                                           |      |
| 1 | RC4-24 | nb          | M | de novo |                                                                      | 16470698                                                 | Ring chromosome 4 and Wolf-Hirschhorn syndrome (WHS) in a child with multiple                                                                     | Balci S, Engiz O, Aktaş D, Vargel I, Bektaş MS, Mrasek K, Vermeesch J,                                                               | Am J Med Genet A. 2006 Mar 15;140(6):628-32. doi: 10.1002/ajmg.a.31900.                 | 2006                                                                           |      |
| 1 | RC4-25 | pn: 26 gwks | M | de novo | stillbirth, 29 gwks                                                  | 17471607                                                 | Prenatal diagnosis of mosaic ring chromosome 4                                                                                                    | Chen CP, Hsu CY, Tzen CY, Lee CC, Chen WL, Chen LF, Wang W.                                                                          | Prenat Diagn. 2007 May;27(5):485-7. doi: 10.1002/pd.1717.                               | 2007                                                                           |      |
| 1 | RC4-26 | nb          | M | de novo |                                                                      | 17696124                                                 | Two unique patients with novel microdeletions in 4p16.3 that exclude the WHS critical regions: implications for critical region designation       | South ST, Bleyl SB, Carey JC.                                                                                                        | Am J Med Genet A. 2007 Sep 15;143A(18):2137-42. doi: 10.1002/ajmg.a.31900.              | 2007                                                                           |      |
| 1 | RC4-27 | 10 m        | M | de novo |                                                                      | 19262083                                                 | [A case of mosaic ring chromosome 4 with subtelomeric 4p deletion]                                                                                | Kim JH, Oh PS, Na HY, Kim SH, Cho HC.                                                                                                | Korean J Lab Med. 2009 Feb;29(1):77-81. doi: 10.3343/kjlm.2009.29.1.77.                 | 2009                                                                           |      |
| 1 | RC4-28 | 1.5 y       | M | de novo |                                                                      | 19921639                                                 | Characterization of double ring chromosome 4 mosaicism associated with bilateral hip dislocation, cortical dysgenesis, and epilepsy               | Soysal Y, Balci S, Hekimler K, Liehr T, Ewers E, Schoumans J, Bui TH, Içduygu FM, Kosyakova N, Imirzalioglu N.                       | Am J Med Genet A. 2009 Dec;149A(12):2782-7. doi: 10.1002/ajmg.a.33069.                  | 2009                                                                           |      |
| 1 | RC4-29 |             |   |         |                                                                      | 20209176                                                 | Mosaic ring chromosome 4 in a child with mild dysmorphism, congenital heart defects and developmental delay                                       | Chen CP, Lin SP, Su YN, Chern SR, Tsai EJ, Wu PC, Lee CC, Wang W.                                                                    | Genet Couns. 2011;22(3):321-6.                                                          | 2011                                                                           |      |
| 1 | RC4-30 | pn          | F | de novo | denial top                                                           | 24455347                                                 | Prenatal diagnosis of 4p and 4q subtelomeric microdeletion in de novo ring chromosome 4                                                           | Akbas H, Cine N, Erdemoglu M, Atay AE, Simsek S, Turkyilmaz A, Fidanboy                                                              | Case Rep Obstet Gynecol. 2013;2013:248050. doi: 10.1186/1755-8166-7-45.                 | 2013                                                                           |      |
| 1 | RC4-31 | 23 y        | M | de novo | > 23 y                                                               | 46,XY,r(4)(p16.3q35.2)[31]/45,XY,-4[3]                   | 25057292                                                                                                                                          | Meiotic prophase I defects in an oligospermic man with Wolf-Hirschhorn syndrome with ring chromosome 4                               | Yao Q, Wang L, Yao B, Gao H, Li W, Xia X, Shi Q, Cui Y.                                 | Mol Cytogenet. 2014 Jul 1;7:45. doi: 10.1186/1755-8166-7-45. eCollection 2014. | 2014 |
| 1 | RC4-32 | nb          | F | de novo | d.10 wks, cardiac failure                                            | 27610251                                                 | Ring Chromosome 4 in a Child with Multiple Congenital Abnormalities: A Case Report and Review of the Literature                                   | Paththinige CS, Sirisena ND, Kariyawasam UG, Saman Kumara LP, Dissanayake VH.                                                        | Case Rep Genet. 2016;2016:4645716. doi: 10.1155/2016/4645716. Epub 2016 Aug 16.         | 2016                                                                           |      |
| 1 | RC4-33 | 2 y         | M | de novo |                                                                      | 28127864                                                 | Continuing role for classical cytogenetics: Case report of a boy with ring syndrome caused by complete ring chromosome 4 and review of literature | Burgemeister AL, Daumiller E, Dietze-Armana I, Klett C, Freiberg C, Stark W, Lingen M, Centonze I, Rettenberger G, Mehner K, Zirn B. | Am J Med Genet A. 2017 Mar;173(3):727-732. doi: 10.1002/ajmg.a.38063. Epub 2017 Jan 27. | 2017                                                                           |      |
| 1 | RC4-34 |             |   |         |                                                                      | 30428788                                                 | A Case of Thumb Polydactyly which Ulnar Thumb Has No Active Motion in Ring Chromosome 4                                                           | Kishi Y, Ikeda H.                                                                                                                    | J Hand Surg Asian Pac Vol. 2018 Dec;23(4):566-570. doi: 10.1142/S2424835518720311.      | 2018                                                                           |      |
| 1 | RC4-35 | 10 y        | F | de novo |                                                                      | 32293439                                                 | Clinical, cytogenetic, and molecular findings in a patient with ring chromosome 4: case report and literature review                              | Paz-Y-Miño C, Proaño A, Verdezoto SD, García JL, Hernández-Rivas JM, Leone PE.                                                       | BMC Med Genomics. 2019 Nov 21;12(1):167. doi: 10.1186/s12920-019-0614-4.                | 2019                                                                           |      |
| 1 | RC4-36 | 2 y         | M |         |                                                                      | 32761591                                                 | [Analysis of clinical and genetic characteristics of a child with ring chromosome 4 syndrome]                                                     | Lyu Y, Song F, Zhang K, Gao M, Ma J, Wang D, Wan Y, Liu Y, Gai Z.                                                                    | Zhonghua Yi Xue Yi Chuan Xue Za Zhi. 2020 Aug 10;37(8):843-846.                         | 2020                                                                           |      |

|   |       |    |   |         |            |         |                                          |                       |                       |      |
|---|-------|----|---|---------|------------|---------|------------------------------------------|-----------------------|-----------------------|------|
| 1 | RC5-1 | nb | F | de novo | 46,XX,r(5) | 4159145 | "Cri du Chat" due to a ring-B chromosome | R A Rohde, R Tompkins | Lancet 2(7421):1075-6 | 1965 |
|---|-------|----|---|---------|------------|---------|------------------------------------------|-----------------------|-----------------------|------|

|              |               |       |   |         |                                                |          |                                                                                                                                           |                                                                                                                                                                |                                                                                                |      |
|--------------|---------------|-------|---|---------|------------------------------------------------|----------|-------------------------------------------------------------------------------------------------------------------------------------------|----------------------------------------------------------------------------------------------------------------------------------------------------------------|------------------------------------------------------------------------------------------------|------|
| 1            | RCS-2 case 1  | 1 m   | M | de novo | 46,XY,r(5)[0.81]                               | 699350   | Ring chromosome 5 in two malformed boys with Cri du Chat syndrome                                                                         | Suerinck E, Noël B, Rethore MO.                                                                                                                                | Clin Genet. 1978 Sep;14(3):125-9. doi: 10.1111/j.1399-0004.1978.tb02116.x.                     | 1978 |
| 1            | RCS-2 case 2  | 10 y  | M | de novo | 46,XY,r(5)[0.93]                               | 699350   |                                                                                                                                           |                                                                                                                                                                |                                                                                                |      |
| 1            | RCS-3         |       |   |         |                                                | 6210897  | Ring chromosome 5 with dental anomalies                                                                                                   | Kula K, Patil S, Hanson J, Nowak A,                                                                                                                            | Pediatr Dent. 1981 Dec;3(4):329-                                                               | 1981 |
| 1            | RCS-4         | 2.5 m | M | de novo | 46,XY,r(5)                                     | 3409543  | Ring chromosome 5                                                                                                                         | Flannery DB, Rogers WG, Byrd JR.                                                                                                                               | Clin Genet. 1988 Jul;34(1):74-8. doi: 1988                                                     | 1988 |
| 2            | RCS-5         |       |   |         |                                                | 2677233  | [The cat cry (cri du chat) syndrome: report of a case with review of 10 cases at the National Taiwan University Hospital]                 | Chuang SM, Wang TR, Jean HH, Lee FY.                                                                                                                           | Taiwan Yi Xue Hui Za Zhi. 1989 Jun;88(6):635-8, 628-9.                                         | 1989 |
| 1            | RCS-6 case 1  | 4 y   | F | mat     | 46,XX,r(5)(p15q35)[0.89]                       | 2227937  | Investigation of three patients with the "ring syndrome", including familial transmission of ring 5, and estimation of reproductive risks | MacDermot KD, Jack E, Cooke A, Turleau C, Lindenbaum RH, Pearson J, Patel C, Barnes PM, Portch J, Crawford                                                     | Hum Genet. 1990 Oct;85(5):516-20. doi: 10.1007/BF00194228.                                     | 1990 |
| 1            | RCS-6 case 3  | 4 m   | F | de novo | 46,XX,r(5)(p15q35)[0.74]                       | 2227937  |                                                                                                                                           |                                                                                                                                                                |                                                                                                |      |
| 1            | RCS-7         | 2 y   | F | de novo | 46,XX,r(5)[0.88]                               | 8172236  | Ring chromosome 5 associated with severe growth retardation as the sole major physical abnormality                                        | Migliori MV, Cherubini V, Bartolotta E, Pettinari A, Pecora R.                                                                                                 | Am J Med Genet. 1994 Jan 1;49(1):108-10. doi: 10.1002/ajmg.1320490121.                         | 1994 |
| 1            | RCS-8         | nb    | M | de novo | d. 4.5 m<br>46,XY,r(5)[183]/45,XY,-5[30]       | 22193390 | Clinical and molecular cytogenetic studies in ring chromosome 5: report of a child with congenital abnormalities                          | Basinko A, Giovannucci Uzielli ML, Scarselli G, Priolo M, Timpani G, De Braekeleer M.                                                                          | Eur J Med Genet. 2012 Feb;55(2):112-6. doi: 10.1016/j.ejmg.2011.11.005. Epub 2011 Dec 2.       | 2012 |
| 1            | RCS-9         | 3 y   | F | de novo | 46,XX,r(5)(p14q35)[80]/45,XX,-5[8]/47,+r(5)[3] | 24052730 | Ring autosomes: some unexpected findings                                                                                                  | Caba L, Rusu C, Plăiașu 5th, Gug G, Grămescu M, Bujoran C, Ochiană D, Voloșciuc M, Popescu R, Braha E, Pânzaru M, Butnariu L, Sîrețeanu A, Covic M, Gorduza E. | Balkan J Med Genet. 2012 Dec;15(2):35-46. doi: 10.2478/bjmg-2013-0005.                         | 2012 |
| 1            | RCS-10        | 17 y  | F |         | 46,XX,r(5)(p14.3q35.3)                         | 32519173 | Myelodysplastic syndromes in a pediatric patient with Cri du Chat syndrome with a ring chromosome 5                                       | Nozawa A, Ozeki M, Yasue S, Endo S, Kadowaki T, Ohnishi H, Muramatsu H, Hama A, Takahashi Y, Kojima S, Fukao T.                                                | Int J Hematol. 2020 Nov;112(5):728-2020 733. doi: 10.1007/s12185-020-02909-7. Epub 2020 Jun 9. | 2020 |
| <b>13 10</b> |               |       |   |         |                                                |          |                                                                                                                                           |                                                                                                                                                                |                                                                                                |      |
| 1            | RC6-1         | 1 y   | F | de novo | BL: 46,XX,r(6)[66]; SF: 46,XX,r(6)[98]         | 4774541  | Developmental abnormalities associated with a ring chromosome 6                                                                           | Moore CM, Heller RH, Thomas GH.                                                                                                                                | J Med Genet. 1973 Sep;10(3):299-303. doi: 10.1136/jmg.10.3.299.                                | 1973 |
| 1            | RC6-2         | ?     | M |         | 46,XY,r(6)/45,XY,-6                            | 4546343  | [Ring chromosome 6. Karotype 46, XY, r (6)-45, XY,-                                                                                       | Van den Berghe H, Fryns JP, Cassiman JJ, David G.                                                                                                              | Ann Genet. 1974 Mar;17(1):29-35.                                                               | 1974 |
| 0            | RC6-2 fu      |       |   |         |                                                | 2288465  | Ring chromosome 6: twenty years follow-up                                                                                                 | Fryns JP, Kleczkowska A, van den                                                                                                                               | Ann Genet. 1990;33(3):179.                                                                     | 1990 |
| 1            | RC6-3         | 1 y   | M |         | 46,XY,r(6)[150]/45,XY,-6[15]/r-var[9]          | 1139788  | Mental retardation and congenital malformations associated with a ring chromosome 6                                                       | Fried K, Rosenblatt M, Mundel G, Krikler R.                                                                                                                    | Clin Genet. 1975 Mar;7(3):192-6. doi: 10.1111/j.1399-0004.1975.tb00318.x.                      | 1975 |
| 1            | RC6-4         | nb    | M | de novo | d. 6 m<br>46,XY,r(6)                           | 1204234  | Ring chromosome 6 in a malformed boy                                                                                                      | Salamanca-Gonez F, Nava S, Armendares S.                                                                                                                       | Clin Genet. 1975 Nov;8(5):370-5. doi: 10.1111/j.1399-0004.1975.tb01516.x.                      | 1975 |
| 1            | RC6-5         | 5 y   | F |         | 46,XX,r(6)                                     | 305748   | [Ring 6-chromosome: a nonspecific clinical picture]                                                                                       | Sele B, Joannard A, Jalbert P, Bouchard                                                                                                                        | Ann Genet. 1977 Dec;20(4):232-6.                                                               | 1977 |
| 1            | RC6-6         | 4.5 y | M | nd      | 46,XY,r(6)(p25q26)[48]/46,XY[5]                | 511129   | Ring chromosome 6: case report and review of literature                                                                                   | Kini KR, Van Dyke DL, Weiss L, Logan MS.                                                                                                                       | Hum Genet. 1979;50(2):145-9. doi: 10.1007/BF00390235.                                          | 1979 |
| 1            | RC6-7         | 7 y   | M | de novo | 46,XY,r(6)                                     | 517581   | Ring chromosome 6 in a child with minimal abnormalities                                                                                   | Carnevale A, Blanco B, Castillo J, del Castillo V, Dominguez D.                                                                                                | Am J Med Genet. 1979;4(3):271-7. doi: 10.1002/ajmg.1320040310.                                 | 1979 |
| 1            | RC6-8         | 1.5 y | M |         | 46,XY,r(6)                                     | 7205202  | [Phenotype of a ring-chromosome 6 carrier. Clinical and cytogenetic study]                                                                | Cruz-Marin F, Gilgenkrantz S, Gregoire MJ, Beley G, Pierson M.                                                                                                 | J Genet Hum. 1980 Dec;28(4):95-104.                                                            | 1980 |
| 1            | RC6-9         | 3 y   | F | nd      | 46,XX,r(6)[0.73]                               | 7091194  | Ring chromosome 6: case report and review                                                                                                 | Nishi Y, Yoshimura O, Ohama K, Usui T.                                                                                                                         | Am J Med Genet. 1982 May;12(1):109-14. doi: 10.1002/ajmg.1320120115.                           | 1982 |
| 1            | RC6-10 case 1 | nb    | F | de novo | d. 2 wks<br>46,XX,r(6)[78/106]                 | 6660249  | Ring chromosome 6: variability in phenotypic expression                                                                                   | Peeden JN, Scarbrough P, Taysi K, Wilroy RS, Finley S, Luthardt F,                                                                                             | Am J Med Genet. 1983 Dec;16(4):563-73. doi: 1983                                               | 1983 |
| 1            | RC6-10 case 2 | 6 y   | F | de novo | 46,XX,r(6)[138/252]                            | 6660249  |                                                                                                                                           |                                                                                                                                                                |                                                                                                |      |
| 1            | RC6-10 case 3 | 2 m   | F | de novo | 46,XX,r(6)[39/40]                              | 6660249  |                                                                                                                                           |                                                                                                                                                                |                                                                                                |      |
| 1            | RC6-10 case 4 | 1 y   | M | de novo | 46,XY,r(6)(p25q26)[91/116]                     | 6660249  |                                                                                                                                           |                                                                                                                                                                |                                                                                                |      |
| 1            | RC6-11        | nb    | M | de novo | 46,XY,r(6)(p24q26)[43/55]                      | 3777023  | Aniridia, congenital glaucoma, and hydrocephalus in a male infant with ring chromosome 6                                                  | Levin H, Ritch R, Barathur R, Dunn MW, Teekhasaene C, Margolis S.                                                                                              | Am J Med Genet. 1986 Oct;25(2):281-7. doi: 10.1002/ajmg.1320250212.                            | 1986 |
| 1            | RC6-12        | 1 m   | M | de novo | 46,XY,r(6)(p24q26)[38]/45,XY,-6[9]/r-var[3]    | 3544845  | Ring chromosome 6: report of a patient and literature review                                                                              | Chitayat D, Hahm SY, Iqbal MA, Nitowsky HM.                                                                                                                    | Am J Med Genet. 1987 Jan;26(1):145-51. doi: 10.1002/ajmg.1320260122.                           | 1987 |
| 1            | RC6-13        | 1.5 y | F | de novo | 46,XX,r(6)[51]/45,XX,-6[49]                    | 3653144  | Erroneous diagnosis of fetal alcohol syndrome in a patient with ring chromosome 6                                                         | Römke C, Heyne K, Stewens J, Schwinger E.                                                                                                                      | Eur J Pediatr. 1987 Jul;146(4):443. doi: 10.1007/BF00444963.                                   | 1987 |
| 1            | RC6-14        | 3 y   | F | nd      | 46,XX,r(6)/45,XX,-6                            | 3314511  | Decreased superoxide dismutase-2 activity in a patient with ring chromosome 6                                                             | Yoshimitsu K, Nishi Y, Kobayashi Y, Yoshimura O, Ohama K, Oguma N, Usui T.                                                                                     | Am J Med Genet. 1987 Sep;28(1):211-4. doi: 10.1002/ajmg.1320280128.                            | 1987 |

|   |               |      |   |                |                                |                                                                                      |          |                                                                                                                                                                                       |                                                                                                                                                                                             |                                                                                                          |      |
|---|---------------|------|---|----------------|--------------------------------|--------------------------------------------------------------------------------------|----------|---------------------------------------------------------------------------------------------------------------------------------------------------------------------------------------|---------------------------------------------------------------------------------------------------------------------------------------------------------------------------------------------|----------------------------------------------------------------------------------------------------------|------|
| 1 | RC6-15        | 2 y  | F |                |                                | 46,XX,r(6)[0.72-0.90 in 11 times]                                                    | 2333874  | Ring chromosome 6: clinical and cytogenetic behaviour                                                                                                                                 | Paz-y-Miño C, Benítez J, Ayuso C, Sánchez-Cascos A.                                                                                                                                         | Am J Med Genet. 1990 Apr;35(4):481-3. doi: 10.1002/ajmg.1320350407.                                      | 1990 |
| 1 | RC6-16        | pn   | F | CtB            | d. 4 m, respiratory arrest     | 46,XX,r(6)(p25q27)[0.38]/45,XX,-6[0.62]                                              | 8559761  | Prenatal diagnosis of ring chromosome 6                                                                                                                                               | Dawson AJ, Marles SL, Harman CR, Phillips S, Menticoglou S.                                                                                                                                 | Prenat Diagn. 1995 Sep;15(9):872-4. doi: 10.1002/pd.1970150915.                                          | 1995 |
| 1 | RC6-17        | pn   | M | mat nl, pat nd | Ctb, > 17 m                    | 45,XY,-6/45,XY,-6,+f/46,XY,r(p25q27)                                                 | 8905901  | Prenatal diagnosis of ring chromosome 6 in a fetus with hydrocephalus                                                                                                                 | Walker ME, Lynch-Salamon DA, Milatovich A, Saal HM.                                                                                                                                         | Prenat Diagn. 1996 Sep;16(9):857-61. doi: 10.1002/(SICI)1097-0223(199609)16:9<857::AID-PD950>3.0.CO;2-J. | 1996 |
| 1 | RC6-18        | pn   | M | de novo        | Ctb                            | 46,XY,r(6)[0.92]/45,XY,-6[0.05]/46,XY[0.03]                                          | 11334612 | Microdissection and reverse painting reveals a microdeletion 6(q26qter) in a de novo r(6) chromosome                                                                                  | Birnbacher R, Chudoba I, Pirc-Danoewinata H, König M, Kohlhauser C, Schnedl W, Haas OA.                                                                                                     | Ann Genet. 2001 Jan-Mar;44(1):13-8. doi: 10.1016/s0003-3995(00)10333-9.                                  | 2001 |
| 1 | RC6-19        | 3 y  | M | de novo        |                                | 46,XY,r(6)(p25q27)[17]/45,XY,-6[4]/r-var[6]                                          | 11223855 | An 11-year-old boy with mosaic ring chromosome 6 and dilated aortic root                                                                                                              | Ivanovich JL, Watson MS, Whelan AJ.                                                                                                                                                         | Am J Med Genet. 2001 Jan 15;98(2):182-4. doi: 10.1002/1096-                                              | 2001 |
| 1 | RC6-20 case 1 | pn   | M | top            |                                | AC: 45,XY,-6<br>BL: 46,XY,r(6)(p25q27)[44]/45,XY,-6[6]                               | 11857558 | Ring chromosome 6 in three fetuses: case reports, literature review, and implications for prenatal diagnosis                                                                          | Urban M, Bommer C, Tennstedt C, Lehmann K, Thiel G, Wegner RD, Bollmann R, Becker R, Schulzke I,                                                                                            | Am J Med Genet. 2002 Mar 1;108(2):97-104. doi: 10.1002/ajmg.10215.                                       | 2002 |
| 1 | RC6-20 case 2 | pn   | M | top            |                                | BL: mos 46,XY,r(6)(p25q27)[92]/45,XY,-6[8]                                           | 11857558 |                                                                                                                                                                                       |                                                                                                                                                                                             |                                                                                                          |      |
| 1 | RC6-20 case 3 | pn   | M | top            |                                | AC: r(6)                                                                             | 11857558 |                                                                                                                                                                                       |                                                                                                                                                                                             |                                                                                                          |      |
| 1 | RC6-21        | 2 m  | M | de novo        |                                | 46,XY,r(6)(p25q27)[0.84]/r-var[0.16]                                                 | 14708101 | FOXC1 gene deletion is associated with eye anomalies in ring chromosome 6                                                                                                             | Zhang HZ, Li P, Wang D, Huff S, Nimmakayalu M, Qumsiyeh M, Pober                                                                                                                            | Am J Med Genet A. 2004 Jan 30;124A(3):280-7. doi:                                                        | 2004 |
| 1 | RC6-22        | pn   | M | de novo        | stillbirth                     | 46,XY,r(6)(p25q27)[21]/45,XY,-6[47]                                                  | 16053913 | Prenatal diagnosis of ring chromosome 6 in a fetus with cerebellar hypoplasia and partial agenesis of corpus callosum: case report and review of the literature                       | Andrieux J, Devisme L, Valat AS, Robert Y, Frnka C, Savary JB.                                                                                                                              | Eur J Med Genet. 2005 Apr-Jun;48(2):199-206. doi: 10.1016/j.ejmg.2005.01.028. Epub 2005 Feb 12.          | 2005 |
| 1 | RC6-23        | 15 y | F | de novo        | > 24 y, birth of a healthy boy | 46,XX,r(6)(p25.3q27)[16]/45,XX,-6[2]/r-var[1]                                        | 18302251 | Molecular characterization of a de novo ring chromosome 6 in a growth retarded but otherwise healthy woman                                                                            | Höckner M, Utermann B, Erdel M, Fauth C, Utermann G, Kotzot D.                                                                                                                              | Am J Med Genet A. 2008 Apr 1;146A(7):925-9. doi: 10.1002/ajmg.a.32251.                                   | 2008 |
| 1 | RC6-24        | 5 y  | M | de novo        |                                | 46,XY,r(6)[45]/46,XY[15]                                                             | 18485670 | An epileptic case with mosaic ring chromosome 6 and 6q terminal deletion                                                                                                              | Kara N, Okten G, Guneş SO, Saglam Y, Tasdemir HA, Pinarli FA.                                                                                                                               | Epilepsy Res. 2008 Aug;80(2-3):219-23. doi:                                                              | 2008 |
| 1 | RC6-25        | 3 m  | M | de novo        |                                | 46,XY,r(6)(p25q27)                                                                   | 21063149 | De novo ring chromosome 6 in a child with multiple congenital anomalies                                                                                                               | Ahzad HA, Ramli SF, Loong TM, Salahshourfar I, Zilfalil BA, Yusoff NM.                                                                                                                      | Kobe J Med Sci. 2010 Sep 28;56(2):E79-84.                                                                | 2010 |
| 1 | RC6-26        | nb   | M |                |                                | 46,XY,r(6)(p25q27)/46,XY,dic r(6;6)                                                  | 22876064 | Mosaic ring chromosome 6 in an infant with significant patent ductus arteriosus and multiple congenital anomalies                                                                     | Lee SJ, Han DK, Cho HJ, Cho YK, Ma JS.                                                                                                                                                      | J Korean Med Sci. 2012 Aug;27(8):948-52. doi: 10.3346/jkms.2012.27.8.948. Epub 2012 Jul 25.              | 2012 |
| 1 | RC6-27        | 5 m  | F |                |                                | 46,XX,r(6)(p25q27)                                                                   | 23398904 | Array-CGH characterization and genotype-phenotype analysis in a patient with a ring chromosome 6                                                                                      | Ciocca L, Surace C, Digilio MC, Roberti MC, Sirlento P, Lombardo A, Russo S, Brizi V, Grotta S, Cini C, Angioni A.                                                                          | BMC Med Genomics. 2013 Feb 11;6:3. doi: 10.1186/1755-8794-6-3.                                           | 2013 |
| 1 | RC6-28        | 3 y  | F |                |                                | 46,XX,r(6)(p25q27)[67]/45,XX,-6[25]/r-var[8]                                         | 26213576 | Periventricular heterotopia and white matter abnormalities in a girl with mosaic ring                                                                                                 | Nishigaki S, Hamazaki T, Saito M, Yamamoto T, Seto T, Shintaku H.                                                                                                                           | Mol Cytogenet. 2015 Jul 26;8:54. doi: 10.1186/s13039-015-0162-3.                                         | 2015 |
| 1 | RC6-29        | 6 y  | F | de novo        |                                | BL: 46,XX,r(6)(p25.3q27)[81]/45,XX,-6[7]<br>SF: 46,XX,r(6)(p25.3q27)[47]/45,XX,-6[3] | 27103944 | Molecular characterization of a novel ring 6 chromosome using next generation sequencing                                                                                              | Zhang R, Chen X, Li P, Lu X, Liu Y, Li Y, Zhang L, Xu M, Cram DS.                                                                                                                           | Mol Cytogenet. 2016 Apr 21;9:33. doi: 10.1186/s13039-016-0245-9. eCollection 2016.                       | 2016 |
| 1 | RC6-30        | nb   | M | de novo        | > 49 y                         | 46,XY,r(6)                                                                           | 28344652 | Molecular cytogenetic characterisation of a novel de novo ring chromosome 6 involving a terminal 6p deletion and terminal 6q duplication in the different arms of the same chromosome | Pace NP, Maggouta F, Twigden M, Borg I.                                                                                                                                                     | Mol Cytogenet. 2017 Mar 23;10:9. doi: 10.1186/s13039-017-0311-y. eCollection 2017.                       | 2017 |
| 1 | RC6-31        | 2 y  | M | de novo        |                                | 46,XY,r(6)[0.82]/46,XY[0.06]/r-var[0.12]                                             | 29656294 | Gray Matter Heterotopia, Mental Retardation, Developmental Delay, Microcephaly, and Facial Dysmorphisms in a Boy with Ring Chromosome 6: A 10-Year Follow-Up and Literature Review    | Liu S, Wang Z, Wei S, Liang J, Chen N, OuYang H, Zeng W, Chen L, Xie X, Jiang J.                                                                                                            | Cytogenet Genome Res. 2018;154(4):201-208. doi: 10.1159/000488692. Epub 2018 Apr 14.                     | 2018 |
| 1 | RC6-32        | 11 y | M | de novo        |                                | 46,XY,r(6)(p25.3q27)[54]/45,XY,-6[13]/46,XY[6]/r-var[15]                             | 30305128 | A child with intellectual disability and dysmorphism due to complex ring chromosome 6: identification of molecular mechanism with review of literature                                | Sheth F, Liehr T, Shah V, Shah H, Tewari S, Solanki D, Trivedi S, Sheth J.                                                                                                                  | Ital J Pediatr. 2018 Oct 11;44(1):114. doi: 10.1186/s13052-018-0571-0.                                   | 2018 |
| 1 | RC6-33        | nb   | M | nd             |                                | 46,XY,r(6)(p24q25)                                                                   | 30225942 | Ring chromosome 6 in a child with anterior segment dysgenesis and review of its overlap with other FOXC1 deletion phenotypes                                                          | Corona-Rivera JR, Corona-Rivera A, Zepeda-Romero LC, Rios-Flores IM, Rivera-Vargas J, Orozco-Vela M, Santana-Bejarano UF, Torres-Anguiano E, Pinto-Cardoso M, David D, Bobadilla-Morales L. | Congenit Anom (Kyoto). 2019 Sep;59(5):174-178. doi: 10.1111/cga.12309. Epub 2018 Oct 9.                  | 2019 |

|           |              |       |   |                |                           |                                                                                                     |          |                                                                                                                                                                     |                                                                                                    |                                                                                                        |      |
|-----------|--------------|-------|---|----------------|---------------------------|-----------------------------------------------------------------------------------------------------|----------|---------------------------------------------------------------------------------------------------------------------------------------------------------------------|----------------------------------------------------------------------------------------------------|--------------------------------------------------------------------------------------------------------|------|
| 1         | RC6-34       | 10 y  | F | de novo        |                           | 46,XX,r(6)(p25q27)                                                                                  | 34622791 | Restrictive cardiomyopathy with ring chromosome 6 anomaly in a child                                                                                                | Sunkak S, Kiraz A, Argun M, Erdoğan İ.                                                             | Anatol J Cardiol. 2021 Oct;25(10):745-746. doi: 10.5152/AnatolJCardiol.2021.80820                      | 2021 |
| <b>39</b> | <b>35</b>    |       |   |                |                           |                                                                                                     |          |                                                                                                                                                                     |                                                                                                    |                                                                                                        |      |
| 1         | RC7-1 case 1 | 1 y   | M |                |                           | 46,XY,r(7)[65]/45,XY,-7[1]/46,XY,dic r(7)[3]/46,XY[1]; 46,XY,r(7)[57]/45,XY,-7[2]/r-var[3]/46,XY[1] | 4145271  | Ring chromosome 7 with variable phenotypic expression                                                                                                               | Zackai EH, Breg WR.                                                                                | Cytogenet Cell Genet. 1973;12(1):40-8. doi: 10.1159/000130436.                                         | 1973 |
| 1         | RC7-1 case 2 | 1.5 y | M |                |                           | 46,XY,r(7)[52]/45,XY,-7[4]/r-var[4]/46,XY[2]                                                        | 4145271  |                                                                                                                                                                     |                                                                                                    |                                                                                                        |      |
| 1         | RC7-2        | 8.5 y | F | de novo        | > 18 y                    | 46,XX,r(7)[98/100]                                                                                  | 7172483  | A fourth case of ring chromosome 7                                                                                                                                  | DeLozier CD, Theintz G, Sizonenko P, Engel E.                                                      | Clin Genet. 1982 Aug;22(2):90-8. doi: 10.1111/j.1399-0004.1982.tb01419.x.                              | 1982 |
| 0         | RC7-2        |       |   |                |                           |                                                                                                     | 6705244  | Cytogenetics of ring chromosome 7                                                                                                                                   | DeLozier-Blanchet CD, Guenin R.                                                                    | Clin Genet. 1984 Jan;25(1):84-5. doi: 10.1111/j.1399-0004.1984.tb00468.x.                              | 1984 |
| 1         | RC7-3        | 5 m   | F | de novo        |                           | 46,XX,r(7)[46/50]                                                                                   | 3150243  | Ring chromosome 7: report of a case                                                                                                                                 | Kohyama J, Watanabe S, Nakajima M, Suzumura H, Ishikawa T, Ishikawa K,                             | Acta Paediatr Jpn. 1988 Aug;30(4):517-9. doi:                                                          | 1988 |
| 1         | RC7-4        | 3 y   | M | de novo        |                           | 46,XY,r(7)[0.63]                                                                                    | 2189730  | Ring chromosome 7: report of the fifth case                                                                                                                         | Caramia GM, Baroncini A, Osimani P, Forabosco A.                                                   | Eur J Pediatr. 1990 Apr;149(7):475-6. doi: 10.1007/BF01959398.                                         | 1990 |
| 1         | RC7-5        | nb    | M | mat nl, pat nd | > 39 y                    | 46,XY,r(7)                                                                                          | 2395166  | Ring chromosome 7 in a man with multiple congenital anomalies and mental retardation                                                                                | Koiffmann CP, Diamant A, de Souza DH, Wajntal A.                                                   | J Med Genet. 1990 Jul;27(7):462-4. doi: 10.1136/jmg.27.7.462.                                          | 1990 |
| 1         | RC7-6        | nb    | M | de novo        | d. 1 m resp/renal failure | 46,XY,r(7)(p22q36)                                                                                  | 1746606  | Severe anomalies associated with ring chromosome 7                                                                                                                  | Biesecker LG, Cox B, Glover TW.                                                                    | Am J Med Genet. 1991 Sep 15;40(4):429-31. doi: 10.1002/ajmg.1320400410.                                | 1991 |
| 0         | RC7-7        |       |   |                |                           |                                                                                                     | 1415332  | Ring chromosome 7, hyperpigmented skin lesions and malignant melanoma                                                                                               | DeLozier-Blanchet CD, Masouyé I, Vollenweider S.                                                   | Am J Med Genet. 1992 Aug 1;43(6):1039-40. doi: 10.1002/ajmg.1320430626.                                | 1992 |
| 1         | RC7-8        | 8.5 y | F | de novo        |                           | 46,XX,r(7)                                                                                          | 8428043  | Melanoma associated with ring chromosome 7                                                                                                                          | Vollenweider Roten S, DeLozier-Blanchet CD, Masouyé I, Saurat JH.                                  | Dermatology. 1993;186(2):138-43. doi: 10.1159/000247325.                                               | 1993 |
| 0         | RC7-9        |       |   |                |                           |                                                                                                     | 8428052  | Cutaneous findings in ring chromosome 7 syndrome                                                                                                                    | Vollenweider Roten S, Masouyé I, DeLozier-Blanchet CD, Saurat JH.                                  | Dermatology. 1993;186(2):84-7. doi: 10.1159/000247313.                                                 | 1993 |
| 1         | RC7-10       | nb    | M | de novo        | d. 20 m                   | 46,XY,r(7)(p22q36)                                                                                  | 8362903  | Case of ring chromosome 7: the first report of neuropathological findings                                                                                           | Tsukamoto H, Sakai N, Taniike M, Nakatsukasa M, Yoshiwara W, Sakamoto H, Fujimura H, Inui K, Okada | Am J Med Genet. 1993 Jul 1;46(6):632-5. doi: 10.1002/ajmg.1320460606.                                  | 1993 |
| 1         | RC7-11       | 8 y   | M | mat nl, pat nd | > 18 y                    | 46,XY,r(7)(p22.3q36.3)/45,XY,-7                                                                     | 8922097  | Boy with a ring 7 chromosome: a case report with special reference to dermatological findings                                                                       | Wahlström J, Bjarnason R, Rosdahl I, Albertsson-Wikland K.                                         | Acta Paediatr. 1996 Oct;85(10):1256-60. doi: 10.1111/j.1651-2227.1996.tb18243.x.                       | 1996 |
| 1         | RC7-12       | nb    | M |                | d. 5 m pneumonia          | 46,XY,r(7)(p22q36)[90]/45,XY,-7[8]/r-var[2]                                                         | 8911601  | Sub-band deletion of 7q36.3 in a patient with ring chromosome 7: association with holoprosencephaly                                                                 | Sawyer JR, Lukacs JL, Hasset SJ, Arnold GL, Mitchell HF, Muenke M.                                 | Am J Med Genet. 1996 Oct 16;65(2):113-6. doi: 10.1002/(SICI)1096-                                      | 1996 |
| 1         | RC7-13       | 1.5 y | F |                |                           | 46,XX,UPD(7)mat[30]/47,XX,UPD7mat,+r(7)pat[15]                                                      | 10227403 | 47,XX,UPD(7)mat,+r(7)pat/46,XX,UPD(7)mat mosaicism in a girl with Silver-Russell syndrome (SRS): possible exclusion of the putative SRS gene from a 7p13-q11 region | Miyoshi O, Kondoh T, Taneda H, Otsuka K, Matsumoto T, Niikawa N.                                   | J Med Genet. 1999 Apr;36(4):326-9.                                                                     | 1999 |
| 0         | RC7-14       |       |   |                |                           |                                                                                                     | 10905891 | Silver-Russell syndrome and ring chromosome 7                                                                                                                       | Wakeling EL, Hitchins M, Stanier P, Monk D, Moore GE, Preece MA.                                   | J Med Genet. 2000 May;37(5):380. doi: 10.1136/jmg.37.5.380.                                            | 2000 |
| 1         | RC7-15       | nb    | F | de novo        |                           | 46,XX,r(7)                                                                                          | 10982483 | Ring chromosome 7 and sacral agenesis                                                                                                                               | Rodríguez L, Sanchís A, Villa A, Cánovas A, Peris S, Estivalis M, Pons S, Martínez-Frías ML.       | Am J Med Genet. 2000 Sep 4;94(1):52-8. doi: 10.1002/1096-8628(20000904)94:1<52::aid-ajmg11>3.0.co;2-q. | 2000 |
| 1         | RC7-16       | 1.5 y | M |                |                           | 46,XY,r(7)[39]/r-var[3]/45,X-7[1]                                                                   | 12431259 | Ring syndrome caused by ring chromosome 7 without loss of subtelomeric sequences                                                                                    | Vermeesch JR, Baten E, Fryns JP, Devriendt K.                                                      | Clin Genet. 2002 Nov;62(5):415-7. doi: 10.1034/j.1399-0004.2002.620511.x.                              | 2002 |
| 1         | RC7-17       | nb    | M |                |                           | 46,XY,r(7)(p22q36)                                                                                  | 15523614 | Somatic mosaicism of chromosome 7 in a highly proliferating melanocytic congenital naevus in a ring chromosome 7 patient                                            | Mehraein Y, Ehlhardt S, Wagner A, Göttert E, Tilgen W, Zang KD, Dill-Müller D.                     | Am J Med Genet A. 2004 Dec 1;131(2):179-85. doi: 10.1002/ajmg.a.30370.                                 | 2004 |
| 1         | RC7-18       | ?     | F |                |                           | 46,XX,r(7)/46,XX                                                                                    | 18300171 | Ring chromosome 7 in an Indian woman                                                                                                                                | Kaur A, Dhillon S, Garg PD, Singh JR.                                                              | J Intellect Dev Disabil. 2008                                                                          | 2008 |
| 1         | RC7-19       | 10 m  | F |                |                           | 46,XX,r(7)(p22q36)[75]/45,XX,-7[12]/r-var[11]                                                       | 21303521 | Molecular cytogenetic analysis and clinical manifestations of a case with de novo mosaic ring chromosome 7                                                          | Tsai LP, Lee KF, Fang JS, Liu IY.                                                                  | Mol Cytogenet. 2011 Feb 8;4(1):5. doi: 10.1186/1755-8166-4-5.                                          | 2011 |
| 1         | RC7-20       | pn    | F | de novo        | top                       | 46,XX,r(7)(p22q36)[2]                                                                               | 23509645 | First trimester diagnosis of holoprosencephaly secondary to a ring chromosome 7                                                                                     | Henderson LB, Corson VL, Saul DO, Anderson C, Millard S, Batista DA,                               | Case Rep Genet. 2013;2013:578202. doi:                                                                 | 2013 |

|           |           |       |        |         |                       |                                                          |          |                                                                                                                                |                                                                                                                                                                   |                                                                                              |      |
|-----------|-----------|-------|--------|---------|-----------------------|----------------------------------------------------------|----------|--------------------------------------------------------------------------------------------------------------------------------|-------------------------------------------------------------------------------------------------------------------------------------------------------------------|----------------------------------------------------------------------------------------------|------|
| 1         | RC7-21    | 1.5 y | M      | de novo |                       | PL: 46,XY,r(7)(p22q36.3),<br>i/d-SF: 45,XY,-7/46,XY,r(7) | 24677512 | Cytogenomic and phenotypic analysis in low-level monosomy 7 mosaicism with non-supernumerary ring chromosome 7                 | Salas-Labadía C, Cervantes-Barragán DE, Cruz-Alcívar R, Daber RD, Conlin LK, Leonard LD, Spinner NB, Durán-McKinster C, Dávila-Ortiz de Tirado CA, Reyes A, Yeh W | Am J Med Genet A. 2014 Jul;164A(7):1765-9. doi: 10.1002/ajmg.a.36503. Epub 2014 Mar 26.      | 2014 |
| 1         | RC7-22    | 13 y  | F      |         |                       | 46,XX,r(7)(p22q36)[2]/85-91,idemx2(cp10)/46,XX[9]        | 33678971 | Ring chromosome 7 in a child with T-cell acute lymphoblastic leukemia with myeloid markers                                     | Tirado CA, Reyes A, Yeh W                                                                                                                                         | Proc (Bayl Univ Med Cent). 2021 Jan 19;34(2):302-304                                         | 2021 |
| 1         | RC7-23    | 22 y  | M      |         | > 22 y                | 46,XY,r(7)                                               | 33522711 | Multiple desmoplastic Spitz nevi with BRAF fusions in a patient with ring chromosome 7                                         | Roy SF, Bastian BC, Maguiness S, Giubellino A, Vemula SS, McCalmont                                                                                               | Pigment Cell Melanoma Res. 2021 Sep;34(5):987-993                                            | 2021 |
| <b>21</b> | <b>24</b> |       |        |         |                       |                                                          |          |                                                                                                                                |                                                                                                                                                                   |                                                                                              |      |
| 1         | RC8-1     |       | M      |         |                       |                                                          | 4795572  | [Ring chromosome 8 (46,XY, 8 r) in a boy with debility (author's trans)]                                                       | Pfeiffer RA, Lenard HG.                                                                                                                                           | Klin Padiatr. 1973 May;185(3):187-91.                                                        | 1973 |
| 1         | RC8-2     | 5 y   | M      | de novo |                       | SF: 46,XY,r(8)                                           | 604497   | Ring chromosome 8 in a boy with multiple congenital abnormalities and mental retardation                                       | Hamers AJ, van Kempen C.                                                                                                                                          | J Med Genet. 1977 Dec;14(6):451-5. doi: 10.1136/jmg.14.6.451.                                | 1977 |
| 1         | RC8-3     | 2 y   | F      |         |                       | 46,XX,r(8)                                               | 1746890  | Ring chromosome 8 associated with microcephaly                                                                                 | Mingarelli R, Valorani G, Zelante L, Dallapiccola B.                                                                                                              | Ann Genet. 1991;34(2):90-2.                                                                  | 1991 |
| 1         | RC8-4     | 13 y  | F      |         |                       | 46,XX,inv(7)(p22q11.23),r(8)(p23q24.3)                   | 1552550  | Pericentric inversion of chromosome 7 (inv(7)(p22q11.2)) and ring chromosome 8 (r(8)(p23q24.3)) in a girl with minor anomalies | Verma RS, Conte RA, Pitter JH, Luke S.                                                                                                                            | J Med Genet. 1992 Jan;29(1):66-7. doi: 10.1136/jmg.29.1.66.                                  | 1992 |
| 1         | RC8-5     | 12 y  | M      | de novo |                       | 46,XY,r(8)                                               | 11391511 | [Ring chromosome 8: microcephaly, mental retardation and minor facial anomalies with adhesive behavioral phenotype]            | Bibas Bonet H, Fontena M, Fauze R, G de Pinat I.                                                                                                                  | Rev Neurol. 2001 Apr 16-30;32(8):746-50.                                                     | 2001 |
| 1         | RC8-6     | 6.5 y | M      | mat     | >~18 y mat            | 46,XY,r(8)(p23q24.3)[24]/45,XY,-8[2]                     | 15337475 | Inherited ring chromosome 8 without loss of subtelomeric sequences                                                             | Le Caignec C, Boceno M, Jacquemont S, Nguyen The Tich S, Rival JM, David A.                                                                                       | Ann Genet. 2004 Jul-Sep;47(3):289-96. doi: 10.1016/j.amgen.2003.10.005.                      | 2004 |
| 1         | RC8-7     | nb    | M      | de novo | > ~ 20 y              | 46,XY,r(8)/46,XY                                         | 16829350 | Monosomy 8 rescue gave cells with a normal karyotype in a mildly affected man with 46,XY,r(8) mosaicism                        | Gradek GA, Kvistad PH, Houge G.                                                                                                                                   | Eur J Med Genet. 2006 Jul-Aug;49(4):292-7. doi: 10.1016/j.ejmg.2005.08.004. Epub 2005 Oct 6. | 2006 |
| 1         | RC8-8     |       |        |         |                       |                                                          | 24551990 | Ring chromosome 8 with mosaic trisomy 8 syndrome in an infant                                                                  | Imataka G, Ishii J, Tsukada K, Suzumura H, Arisaka O.                                                                                                             | Genet Couns. 2013;24(4):441-4.                                                               | 2013 |
| 1         | RC8-9     | 1 y   | M      |         |                       | 46,XY,r(8)(p23q24.3)[27]/45,XY,-8[3]                     | 33316910 | 46,XY,r(8)/45,XY,-8 Mosaicism as a Possible Mechanism of the Imprinted Birk-Barel Syndrome: A Case Study                       | Kashevarova AA, Nikitina TV, Mikhailik LI, Belyaeva EO, Vasilyev SA, Lopatkina ME, Fedotov DA, Fonova EA, Zarubin AA, Sivtsev AA, Skryabin NA.                    | Genes (Basel). 2020 Dec 9;11(12):1473. doi: 10.3390/genes11121473.                           | 2020 |
| <b>9</b>  | <b>9</b>  |       |        |         |                       |                                                          |          |                                                                                                                                |                                                                                                                                                                   |                                                                                              |      |
| 1         | RC9-1     | 2 m   | M      |         |                       | 46,XX,r(9)                                               | 5445002  | Comparative behavior of ring chromosomes                                                                                       | Kistenmacher ML, Punnett HH                                                                                                                                       | Am J Hum Genet 22(3):304-18, 1970                                                            | 1970 |
| 1         | RC9-2     | 22 y  | F      | de novo | > 22 y                | 46,XX,r(9)                                               | 4127395  | A ring chromosome, diagnosed by quinacrine fluorescence as No. 9, in a mentally retarded girl                                  | P Jacobsen, M Mikkelsen, F Rosleff                                                                                                                                | Clin Genet                                                                                   | 1973 |
| 1         | RC9-3     |       |        |         |                       |                                                          | 4548818  | A case of annular chromosome 9. identification by controlled denaturation                                                      | J Fraisse, B Lauras, M J Ooghe, F Freycon, M O Rethoré                                                                                                            | Ann Genet                                                                                    | 1974 |
| 1         | RC9-4     | 3 y   | M (AG) |         |                       | 46,XY,r(9)(p24q34)                                       | 939548   | Mental retardation and congenital malformations associated with a ring chromosome 9                                            | Nakajima S, Yanagisawa M, Kamoshita S, Nakagome Y.                                                                                                                | Hum Genet. 1976 Jun 29;32(3):289-93. doi: 10.1007/BF00295818.                                | 1976 |
| 1         | RC9-5     | 4 y   | M (AG) |         |                       | 46,XY,r(9)                                               | 885556   | Ring chromosome 9. 46,XY,r(9) in a male with ambiguous external genitalia                                                      | Metaxotou C, Kalpini-Mavrou A.                                                                                                                                    | Hum Genet. 1977 Jul 26;37(3):351-4. doi: 10.1007/BF00393619.                                 | 1977 |
| 1         | RC9-6     | nb    | M      |         |                       | 46,XY,r(9)                                               | 468257   | Moderate mental retardation and nonspecific dysmorphic syndrome associated with ring chromosome 9                              | Fryns JP, Lambrechts A, Jansseune H, Van den Berghe H.                                                                                                            | Hum Genet. 1979;50(1):29-32. doi: 10.1007/BF00295585.                                        | 1979 |
| 1         | RC9-7     | nb    | M      |         | d. 9 d cardiac arrest | 46,XY,r(9)(p24w34)                                       | 489005   | A ring chromosome 9 in an infant with malformations                                                                            | Inouye T, Matsuda H, Shimura K, Hamazaki M, Kikuta I, Iinuma K, Nakagome Y.                                                                                       | Hum Genet. 1979 Sep;50(3):231-5. doi: 10.1007/BF00399386.                                    | 1979 |
| 1         | RC9-8     |       |        |         |                       |                                                          | 6982668  | [A new case of ring chromosome 9]                                                                                              | Portnoi MF, van den Akker J, Le Porrier N, Joye N, Youssef S, Taillemite JL.                                                                                      | Ann Genet. 1982;25(3):164-7.                                                                 | 1982 |
| 1         | RC9-9     |       |        |         |                       |                                                          | 6985015  | Ring chromosome 9: identification of a new case by G- and C-banding                                                            | Dipierri JE, Matayoshi T.                                                                                                                                         | Ann Genet. 1982;25(4):243-5.                                                                 | 1982 |
| 1         | RC9-10    |       |        |         |                       |                                                          | 6301043  | [A new case of ring chromosome 9]                                                                                              | Portnoi MF, van den Akker J, Le Porrier N, Joye N, Youssef S, Taillemite JL.                                                                                      | Sem Hop. 1983 Jan 20;59(3):185-8.                                                            | 1983 |
| 1         | RC9-11    | 25 y  | F      |         | > 25 y                | 46,XX,r(9)(p24q34)                                       | 3130846  | Apparent Prader-Willi phenotype in a woman with ring chromosome 9                                                              | Hess RO, Meisner LF.                                                                                                                                              | Am J Med Genet Suppl. 1987;3:133-8. doi: 10.1002/ajmg.1320280515.                            | 1987 |

|   |               |      |        |                 |                                                 |          |                                                                                                                                                    |                                                                                                                    |                                                                                                                |      |
|---|---------------|------|--------|-----------------|-------------------------------------------------|----------|----------------------------------------------------------------------------------------------------------------------------------------------------|--------------------------------------------------------------------------------------------------------------------|----------------------------------------------------------------------------------------------------------------|------|
| 1 | RC9-12        | nb   | M      | de novo         | 46,XY,r(9)(p24.1q34.3)                          | 3149132  | A patient with ring 9 chromosome 46,XY,r(9)(p24.1q34.3)                                                                                            | Kasa N, Kasai R.                                                                                                   | Acta Paediatr Jpn. 1988 Dec;30(6):710-3. doi: 10.1111/j.1442-200x.1988.tb02558.x.                              | 1988 |
| 1 | RC9-13        |      | F      |                 |                                                 | 3265311  | [Ring chromosome 9. Case report and review of the literature]                                                                                      | Manouvrier-Hanu S, Turck D, Gottrand F, Savary JB, Loeuille GA, Deminatti MM, Farriaux JP.                         | Ann Genet. 1988;31(4):250-3.                                                                                   | 1988 |
| 1 | RC9-14        | 3 m  | F      | d.2 y pneumonia | 46,XX,r(9)                                      | 2774007  | Another case of ring chromosome 9 associated with gastroesophageal reflux                                                                          | Manouvrier-Hanu S, Turck D, Farriaux JP.                                                                           | Am J Med Genet. 1989 Apr;32(4):558. doi: 10.1002/ajmg.1320320432.                                              | 1989 |
| 1 | RC9-15        | nb   | M      |                 |                                                 | 1781957  | Ring chromosome 9 in a newborn male presenting with facial dysmorphism, hypospadias and skeletal abnormalities                                     | Van Maldergem L, Avni F, Mossay B, Herens C, Verloes A, Gillerot Y.                                                | Genet Couns. 1991;2(2):123-7.                                                                                  | 1991 |
| 1 | RC9-16        |      |        |                 |                                                 | 8674446  | [Ring chromosome 9]                                                                                                                                | Kontiakari T, Borgström GH, Ritanen-Lanzi G, Fazzi E, Veggiotti P, Pagliano E, Gariglio M, Bonaglia C, Landolfo S. | Duodecim. 1995;111(5):439-41.                                                                                  | 1995 |
| 1 | RC9-17        | 6 m  | M      | de novo         | 46,XY,r(9)(p24q34)                              | 8836504  | Ring chromosome 9: an atypical case                                                                                                                |                                                                                                                    | Brain Dev. 1996 May-Jun;18(3):216-9. doi: 10.1016/0387-7604(95)00144-1.                                        | 1996 |
| 0 | RC9-18        |      |        |                 |                                                 | 10021722 | Phenotypic variability in the chromosome 9 ring                                                                                                    | Cavaliere ML, Rinaldi MM, Castelluccio P, Cioffi C, Vendemmia M, Vendemmia S.                                      | Acta Biomed Ateneo Parmense. 1997;68 Suppl 1:85-9.                                                             | 1997 |
| 1 | RC9-19        | 6 m  | F      | de novo         | 46,XX,r(9)[45/50]                               | 10486077 | Ring chromosome 9 with a 9p22.3-p24.3 duplication                                                                                                  | Seghezzi L, Maraschio P, Bozzola M, Maserati E, Tupler R, Marchi A, Tiepolo L.                                     | Eur J Pediatr. 1999 Oct;158(10):791-3. doi: 10.1007/s004310051206.                                             | 1999 |
| 1 | RC9-20 case 1 | 16 y | F      |                 | 46,XX,r(9)(p24q34)                              | 16158426 | Ring chromosome 9 [r(9)(p24q34)]: a report of two cases                                                                                            | Purandare SM, Lee J, Hased S, Steele ML, Blackett PR, Mulvihill JJ, Li S.                                          | Am J Med Genet A. 2005 Oct 15;138A(3):229-35. doi: 10.1002/ajmg.a.30382.                                       | 2005 |
| 1 | RC9-20 case 2 | 8 m  | M      | de novo         | 46,XY,r(9)(p24q34)                              | 16158426 |                                                                                                                                                    |                                                                                                                    |                                                                                                                |      |
| 1 | RC9-21        | pn   | M      | de novo top     | 45,XY,-9[9]/46,XY,r(9)[24q34.3][34]/r-var[3]    | 16941502 | Prenatal diagnosis of mosaic ring chromosome 9                                                                                                     | Chen CP, Lin CL, Chen LL, Lee CC, Wang W.                                                                          | Prenat Diagn. 2006 Sep;26(9):870-1. doi: 10.1002/pd.1515.                                                      | 2006 |
| 1 | RC9-22        | 8 m  | M      |                 | 46,X,inv(Y),r(9)(p24q34)                        | 17526969 | Ring chromosome 9 in a dysmorphic child                                                                                                            | Sheth J, Joshi R, Sheth F.                                                                                         | Indian J Pediatr. 2007 May;74(5):507-8. doi: 10.1007/s12098-007-0090-2.                                        | 2007 |
| 1 | RC9-23        | 8 m  | F      |                 | 45,XX,-9[4]/46,XX,r(9)(p24q34)[92]/r-var[4]     | 20931537 | [Analysis of ring chromosome 9 syndrome with fluorescence in situ hybridization]                                                                   | Ye ZC, Zhu XY, Zhao R, He XY, Zhang HJ, Li LP, Zhu YM.                                                             | Zhonghua Yi Xue Yi Chuan Xue Za Zhi. 2010 Oct;27(5):559-62. doi: 10.3760/cma.j.issn.1003-9406.2010.05.018.     | 2010 |
| 1 | RC9-24        | nb   |        |                 |                                                 | 24551976 | Ring chromosome 9 in a newborn                                                                                                                     | Aldemir O, Celik IH, Karaer K, Ceylaner G.                                                                         | Genet Couns. 2013;24(4):357-60.                                                                                | 2013 |
| 1 | RC9-25        | 7 m  | F      |                 | 46,XX,r(9)(p23q34.3)[96]/45,XX,-9[4]            | 23633410 | Ring chromosome 9 in a girl with developmental delay and dysmorphic features: case report and review of the literature                             | la Cour Sibbesen E, Jespersgaard C, Alosi D, Bisgaard AM, Tümer Z.                                                 | Am J Med Genet A. 2013 Jun;161A(6):1447-52. doi: 10.1002/ajmg.a.35901. Epub 2013 Apr 30.                       | 2013 |
| 1 | RC9-26        | pn   | F      | de novo top     | 46,XX,r(9)(p24q34)/45,XX,-9[0.16]               | 25722017 | Prenatal diagnosis of a female fetus with ring chromosome 9, 46,XX,r(9)(p24q34), and a de novo interstitial 9p deletion                            | Penacho V, Galán F, Martín-Bayón TA, Mayo S, Manchón I, Carrasco A, Martínez-Castellano F, Alcaraz LA.             | Cytogenet Genome Res. 2014;144(4):275-9. doi: 10.1159/000370256. Epub 2015 Feb 20.                             | 2014 |
| 1 | RC9-27        | 30 y | M      | > 30 y          | 46,XY,r(9)(p24.3q34.3)[42]/45,XY,-9[5]/46,XY[3] | 25449292 | Azoospermia and ring chromosome 9—a case report                                                                                                    | Laursen RJ, Tüttelmann F, Humaidan P, Elbæk HO, Alsbjerg B, Röpke A.                                               | J Assist Reprod Genet. 2015 Feb;32(2):293-6. doi: 10.1007/s10815-014-0388-8. Epub 2014 Dec 2.                  | 2015 |
| 1 | RC9-28        | 2 y  | M      | de novo d. 7 y  | 46,XY,r(9)(p22q34)[89]/45,XY,-9[4]/r-var[7]     | 27222354 | Ring Chromosome 9 and Chromosome 9p Deletion Syndrome in a Patient Associated with Developmental Delay: A Case Report and Review of the Literature | Sivasankaran A, Kanakavalli MK, Anuradha D, Samuel CR, Kandukuri LR.                                               | Cytogenet Genome Res. 2016;148(2-3):165-73. doi: 10.1159/000445862. Epub 2016 May 26.                          | 2016 |
| 1 | RC9-29        | 6 m  | F (XY) | de novo         | 45,XY,-9[3]/46,XY,r(9)[96]/r-var[6]             | 26829739 | [Analysis of genetics mechanism for the phenotypic diversity in a patient carrying a rare ring chromosome 9]                                       | Qin S, Wang X, Li Y, Wei P, Chen C, Zeng L.                                                                        | Zhonghua Yi Xue Yi Chuan Xue Za Zhi. 2016 Feb;33(1):71-5. doi: 10.3760/cma.j.issn.1003-9406.2016.01.018.       | 2016 |
| 1 | RC9-30        | 6 m  | F (XY) |                 | 46,XY,r(9)[29].45,XY,-9[8]/r-var[2]/46,XY[1]    | 29760778 | Loss of DMRT1 gene in a Mos 45,XY,-9[8]/46,XY,r(9)[29]/47,XY,+idic r(9)× 2[1]/46,XY,idic r(9)[1]/46,XY[1] female presenting with short stature     | Marsudi BA, Kartapradja H, Paramayuda C, Batubara JRL, Harahap AR, Marzuki NS.                                     | Mol Cytogenet. 2018 May 8;11:28. doi: 10.1186/s13039-018-0379-z. eCollection 2018.                             | 2018 |
| 1 | RC9-31        | 2 m  | F      | de novo         | 45,XX,-9[4]/46,XX,r(9)(p24q34)[56]              | 31400141 | [Kleefstra syndrome 1 and ring chromosome 9 in a case]                                                                                             | Lyu N, Li D, Li J, Shang Q, Ma C.                                                                                  | Zhonghua Yi Xue Yi Chuan Xue Za Zhi. 2019 Aug 10;36(8):837-840. doi: 10.3760/cma.j.issn.1003-9406.2019.08.021. | 2019 |
| 1 | RC9-32        | 21 y | M      | adopted > 21 y  | 46,XY,r(9)[100]/45,XY,-9[20]                    | 32978894 | Ring chromosome formation by intra-strand repairing of subtelomeric double strand breaks and clinico-cytogenomic correlations for ring             | Chai H, Ji W, Wen J, DiAdamo A, Grommisch B, Hu Q, Szekeley AM, Li P.                                              | Am J Med Genet A. 2020 Dec;182(12):3023-3028. doi: 10.1002/ajmg.a.61890. Epub 2020                             | 2020 |

| 32 | 32             |       |   |                      |                                                    |          |                                                                                                                                                                 |                                                                                                       |                                          |                                                      |  |
|----|----------------|-------|---|----------------------|----------------------------------------------------|----------|-----------------------------------------------------------------------------------------------------------------------------------------------------------------|-------------------------------------------------------------------------------------------------------|------------------------------------------|------------------------------------------------------|--|
| 1  | RC10-1         | 9 y   | F | de novo              | 46,XX,r(10)                                        | 839503   | Physical retardation is associated with ring chromosome mosaicism: 46, XX,r(10)/45, XX,10                                                                       | Lansky S, Daniel W, Fleiszar K.                                                                       | J Med Genet. 1977 Feb;14(1):61-3. 1977   | doi: 10.1136/jmg.14.1.61.                            |  |
| 1  | RC10-2         | 15 m  | F | de novo              | 46,XX,r(10)(p15q26)                                | 700708   | Ring 10 chromosome: 46,XX,r10(p15q26)                                                                                                                           | Sparkes RS, Ling SM, Muller H.                                                                        | Hum Genet. 1978 Sep 19;43(3):341-1978    | 5. doi: 10.1007/BF00278844.                          |  |
| 1  | RC10-3         | nb    | M | de novo              | 46,XY,r(10),t(10;19)(q25;p13)                      | 567620   | Malformative syndrome associated with a ring 10 chromosome and a translocated 10q/19 chromosome                                                                 | Fryns JP, De Boeck K, Jaeken J, van den Berghe H.                                                     | Hum Genet. 1978 Aug 31;43(2):239-1978    | 44. doi: 10.1007/BF00293602.                         |  |
| 1  | RC10-4         | 8 m   | M | de novo              | PB: 46,XY,r(10)[192/200], SF: 46,XY,r(10)[182/200] | 511137   | Ring chromosome 10 associated with multiple congenital malformations                                                                                            | Simoni G, Rossella F, Dalprà L, Visconti G, Piria-Schwarz C.                                          | Hum Genet. 1979 Oct 1;51(2):117-1979     | 21. doi: 10.1007/BF00287164.                         |  |
| 1  | RC10-5         | 8 m   | F | de novo              | 46,XX,r(10)(p15q26)                                | 7381872  | Ring chromosome 10:46,XX,r(10)(p15 leads to q26)                                                                                                                | Tsukino R, Tsuda N, Dezawa T, Ishii T, Koike M.                                                       | J Med Genet. 1980 Apr;17(2):148-1980     | 50. doi: 10.1136/jmg.17.2.148.                       |  |
| 1  | RC10-6         | nb    | M | de novo              | 46,XY,r(10)[84]/45,XY,-10[13]/r-var[1]             | 7025632  | Phenotype associated with ring 10 chromosome: report of patient and review of literature                                                                        | Michels VV, Driscoll DJ, Ledbetter DH, Riccardi VM.                                                   | Am J Med Genet. 1981;9(3):231-7. 1981    | doi: 10.1002/ajmg.1320090309.                        |  |
| 1  | RC10-7         |       | F |                      |                                                    | 6982669  | [Ring chromosome 10: 46,XX,r(10)(p15q26)]                                                                                                                       | Serville F, Briault R, Taillemite JL, Despoisse S, Cotoni P, Broustet A.                              | Ann Genet. 1982;25(3):168-71. 1982       |                                                      |  |
| 1  | RC10-8         | 2 m   | M | de novo              | 46,XY,r(10)[91]/45,XY,-10[5]/r-var[4]              | 6842550  | Ring chromosome 10 and its clinical features                                                                                                                    | Nakai H, Adachi M, Katsushima N, Yamazaki N, Sakamoto M, Tada K.                                      | J Med Genet. 1983 Apr;20(2):142-4. 1983  | doi: 10.1136/jmg.20.2.142.                           |  |
| 1  | RC10-9         | 2 y   | M | mat nl               | 46,XY,r(10)(p15.3q26.3)                            | 6705254  | Ring chromosome 10 syndrome: case report and the possibility of clinical diagnosis                                                                              | Kondo I, Shimakura Y, Hirano T, Kaneko M, Yabuta K.                                                   | Clin Genet. 1984 Feb;25(2):196-1984      | 200. doi: 10.1111/j.1339-0004.1984.tb00485.x.        |  |
| 1  | RC10-10        | 2.5 y | M |                      | mos 45,XY,-10/46,XY/46,XY,r(10)(p15.3q26.3)        | 3834204  | Report of a patient with a ring chromosome 10: mos45,XY,-10/46,XY/46,XY,r(10)(p15.3q26.3)                                                                       | Kishi K, Ikeuchi T, Yamamoto K, Tonomura A, Sakurada N, Satoh Y.                                      | Jinrui Idengaku Zasshi. 1985             | 1985                                                 |  |
| 1  | RC10-11        | nb    | F | d. 3m, renal failure | PB/SF: 46,XX,r(10)                                 | 7837258  | A newborn with ring chromosome 10, aganglionic megacolon, and renal hypoplasia                                                                                  | Calabrese G, Franchi PG, Stuppia L, Mingarelli R, Rossi C, Ramenghi L, Marino M, Morizio E, Peila R,  | J Med Genet. 1994 Oct;31(10):804-1994    | 6. doi: 10.1136/jmg.31.10.804.                       |  |
| 1  | RC10-12        | 32 y  | M | > 32 y               | 46,XY,r(10)(p15q26)                                | 14598349 | Ring chromosome 10 (p15q26) in a patient with unipolar affective disorder, multiple minor anomalies, and mental retardation                                     | Concolino D, Iembo MA, Moricca MT, Strisciuglio P, Marotta R, Rossi E, Giglio S.                      | Am J Med Genet A. 2003 Dec               | 2003                                                 |  |
| 1  | RC10-13        | nb    | F | de novo              | 46,XX,r(10)                                        | 19968867 | Chromosome r(10)(p15.3q26.12) in a newborn child: case report                                                                                                   | Gunnarsson C, Graffmann B, Jonasson J.                                                                | Mol Cytogenet. 2009 Dec 7;2:25. 2009     | doi: 10.1186/1755-8166-2-25.                         |  |
| 1  | RC10-14        | pn    | M | de novo              | TOP, 27 gwks 46,XY,r(10)(p15.3q26.3)               | 21914491 | Clinical and molecular description of a fetus in prenatal diagnosis with a rare de novo ring 10 and deletions of 12.59 Mb in 10p15.3-p14 and 4.22 Mb in 10q26.3 | Christopoulou G, Tzetzis M, Konstantinidou AE, Tsezou A, Kanavakis E, Kitsiou-Tzeli S, Velissariou V. | Eur J Med Genet. 2012 Jan;55(1):75-2012  | 9. doi: 10.1016/j.ejmg.2011.08.002. Epub 2011 Sep 9. |  |
| 1  | RC10-15 case 1 | 2.5 y | M | de novo              | d. 15 y 46,XY,r(10)(p15.3q26.2)                    | 23247912 | Ring chromosome 10: report on two patients and review of the literature                                                                                         | Guilherme RS, Kim CA, Alonso LG, Horjo RS, Meloni VA, Christofolini DM, Kulikowski LD, Melaragno MI.  | J Appl Genet. 2013 Feb;54(1):35-41. 2013 | doi: 10.1007/s13353-012-0128-7. Epub 2012 Dec 18.    |  |
| 1  | RC10-15 case 2 | nb    | F | de novo              | 46,XX,r(10)(p15.3q26.3)                            | 23247912 |                                                                                                                                                                 |                                                                                                       |                                          |                                                      |  |
| 1  | RC10-16        | 7 m   | F | nd                   | 46,XX,r(10)(p15.1q26.1)                            | 25922618 | Clinical, cytogenetic and molecular study of a case of ring chromosome 10                                                                                       | Čiuladaitė Ž, Burnytė B, Vanseviciūtė D, Dagytė E, Kučinskis V, Utkus A.                              | Mol Cytogenet. 2015 Apr 21;8:29. 2015    | doi: 10.1186/s13039-015-0124-9. eCollection 2015.    |  |
| 1  | RC10-17        | nb    | F |                      | 46,XX,r(10)(p15q26.1)                              | 34680908 | Expanding the Neurological Phenotype of Ring Chromosome 10 Syndrome: A Case Report and Review of the Literature                                                 | Pruccoli J, Graziano C, Locatelli C                                                                   | Genes (Basel). 2021 Sep                  | 2021                                                 |  |

| 18 | 17            |       |   |                          |                                                  |         |                                                                                                  |                                                                          |                                         |                                   |  |
|----|---------------|-------|---|--------------------------|--------------------------------------------------|---------|--------------------------------------------------------------------------------------------------|--------------------------------------------------------------------------|-----------------------------------------|-----------------------------------|--|
| 1  | RC11-1        | 3 m   | F | de novo                  | 46,XX,(11)                                       | 856722  | Ring 11 chromosome (46,xx,r11(p15q25))                                                           | Valente M, Muller H, Sparkes RS.                                         | Hum Genet. 1977 May 10;36(3):345-1977   | 50. doi: 10.1007/BF00446287.      |  |
| 1  | RC11-2        | 2 y   | F |                          | 46,XX,r(11)(p15q25)                              | 6974530 | Ring chromosome 11 [46,XX,r(11) (p15q25)] associated with clinical features of the 11q-          | Niikawa N, Jinno Y, Tomiyasu T, Fukushima Y, Kudo K.                     | Ann Genet. 1981;24(3):172-5. 1981       |                                   |  |
| 1  | RC11-3        | 6 m   | F | d. 1.5 y cardiac failure | 46,XX,r(11)(p15q24)                              | 6829609 | Brief clinical report: ring-11 chromosome: phenotype-karyotype correlation with deletions of 11q | Cousineau AJ, Higgins JV, Scott-Emuakpor AB, Mody G.                     | Am J Med Genet. 1983 Jan;14(1):29-1983  | 35. doi: 10.1002/ajmg.1320140106. |  |
| 1  | RC11-4 case 1 | 2.5 y | F | de novo                  | 46,XX,r(11)(p15.5q25)[0.86]                      | 6315941 | Two cases of ring chromosome 11                                                                  | Romain DR, Gebbie OB, Parfitt RG, Columbano-Green LM, Smythe RH,         | J Med Genet. 1983 Oct;20(5):380-2. 1983 | doi: 10.1136/jmg.20.5.380.        |  |
| 1  | RC11-4 case 2 | 8 m   | M | mat nl                   | d. 1.5 y 46,XY,r(11)(p15q25)                     |         |                                                                                                  |                                                                          |                                         |                                   |  |
| 1  | RC11-5        | 11 y  | M | de novo                  | 46,XY,r(11)(p15.5q25)[72]/46,XY[30]/45,XY,-11[3] | 3086186 | Congenital ocular and other systemic abnormalities associated with ring-11                       | Daniele S, Pecorelli F, Tiepolo L, Armellini R, Liotti FS.               | Graefes Arch Clin Exp Ophthalmol. 1986  | 1986;224(3):317-20. doi:          |  |
| 1  | RC11-6        | nb    | F |                          |                                                  | 3487279 | Ring chromosome 11. A case report and review of the literature                                   | Palka G, Verrotti A, Peca S, Mosca L, Lombardo G, Verrotti M, Morgese G. | Ann Genet. 1986;29(1):55-8. 1986        |                                   |  |

|              |                |       |   |                |        |                                                                                 |          |                                                                                                                                                                |                                                                                                                 |                                                                                                   |      |
|--------------|----------------|-------|---|----------------|--------|---------------------------------------------------------------------------------|----------|----------------------------------------------------------------------------------------------------------------------------------------------------------------|-----------------------------------------------------------------------------------------------------------------|---------------------------------------------------------------------------------------------------|------|
| 1            | RC11-7         | 4.5 y | F | mat            | > 29 y | 46,XX,r(11)(p15q25)                                                             | 3189413  | Ring chromosome 11 and café-au-lait spots                                                                                                                      | Fagan K, Suthers GK, Hardacre G.                                                                                | Am J Med Genet. 1988 Aug;30(4):911-6. doi: 10.1002/ajmg.1320300406.                               | 1988 |
| 1            | RC11-8         | pn    | F | de novo        | top    | AF: 46,XX,r(11)(p15q25)[14]/45,XX,-11[7]                                        | 11503165 | Prenatal diagnosis of a de novo ring chromosome 11                                                                                                             | Mohamed AN, Ebrahim SA, Aatre R, Qureshi F, Jacques SM, Evans MI.                                               | Am J Med Genet. 2001 Sep 1;102(4):368-71. doi: 10.1002/ajmg.1492. PMID: 11503165.                 | 2001 |
| 1            | RC11-9         | 2.5 y | M | de novo        |        | 45,XY,r911(p15.5q25)[90]/45,XY,-11[8]/r-var[2]                                  | 20583153 | Constitutional ring chromosome 11 mosaicism in a Wilms tumor patient: Cytogenetic, molecular and clinico-pathological studies                                  | Affiliations                                                                                                    | Am J Med Genet A. 2010 Jul;152A(7):1756-63. doi: 10.1002/ajmg.a.33420.                            | 2010 |
| 1            | RC11-10 case 1 | nb    | M | de novo        |        | 46,XY,r(11)(p15.5q25)                                                           | 22975011 | Molecular and clinical characterization of patients with a ring chromosome 11                                                                                  | Hansson KB, Gijsbers AC, Oostdijk W, Rehbock JJ, de Snoo F, Ruivenkamp CA,                                      | Eur J Med Genet. 2012 Dec;55(12):708-14. doi:                                                     | 2012 |
| 1            | RC11-10 case 2 | 3 y   | F | de novo        |        | 46,XX,r(11)(p15.5q23.3)                                                         | 22975011 |                                                                                                                                                                |                                                                                                                 |                                                                                                   |      |
| 1            | RC11-10 case 3 | 6 y   | F | mat            | > 37 y | 46,XX,r(11)(p15.5q25)                                                           | 22975011 |                                                                                                                                                                |                                                                                                                 |                                                                                                   |      |
| 1            | RC11-11        | 5 y   | F |                |        | 46,XX,r(11)(p15.5q25)[27]/45,XX,-11[3]                                          | 23234794 | [Wilms' tumor and ring chromosome 11 in a child]                                                                                                               | Zhang H, Feng C, Tang SQ.                                                                                       | Zhongguo Dang Dai Er Ke Za Zhi.                                                                   | 2012 |
| 1            | RC11-12        | 5 y   | F |                | > 20 y | 46,XX,r(11)(p15q25)                                                             | 26576288 | Endocrine abnormalities in ring chromosome 11: a case report and review of the literature                                                                      | Lange R, Von Linsingen C, Mata F, Moraes AB, Arruda M, Vieira Neto L.                                           | Endocrinol Diabetes Metab Case Rep. 2015;2015:150085. doi: 10.1530/EDM-15-0085. Epub 2015 Oct 15. | 2015 |
| 1            | RC11-13        | 12 y  | F | de novo        |        | 46,XX,r(11)(p15.3q24.1),der(21)t(11;21)(p15.3;qter)[158]/45,XX,-11[16]/r-var[5] | 26557157 | De Novo ring chromosome 11 and non-reciprocal translocation of 11p15.3-pter to 21qter in a patient with congenital heart disease                               | Peng Y, Ma R, Zhou Y, Xia Y, Wen J, Zhang Y, Guo R, Li H, Pan Q, Zhang R, Tang C, Liang D, Wu L.                | Mol Cytogenet. 2015 Nov 9;8:88. doi: 10.1186/s13039-015-0191-y. eCollection 2015.                 | 2015 |
| 1            | RC11-14        | 13 y  | M |                |        | 45,XY,-11[18]/46,XY,r(11)[78]/46,XY,dic r(11)[4]                                | 28232783 | Complex Mosaic Ring Chromosome 11 Associated with Hemizygous Loss of 8.6 Mb of 11q24.2qter in Atypical Jacobsen Syndrome                                       | Galvão Gomes A, Paiva Grangeiro CH, Silva LR, Oliveira-Gennaro FG, Pereira CS, Joaquim TM, Panepucci RA, Squire | Mol Syndromol. 2017 Jan;8(1):45-49. doi: 10.1159/000452681. Epub 2016 Nov 17.                     | 2017 |
| <b>17 14</b> |                |       |   |                |        |                                                                                 |          |                                                                                                                                                                |                                                                                                                 |                                                                                                   |      |
| 1            | RC12-1         | 1 y   | F | nd             |        | 46,XX,r(12)(p13q24.1)[0.80]/45,XX,-12[0.8]/r-var[0.12]                          | 7395909  | The syndrome of ring chromosome 12                                                                                                                             | Scribanu N, McCullars EB, Baumiller RC, Colon AR.                                                               | Am J Med Genet. 1980;5(2):165-70. doi: 10.1002/ajmg.1320050210.                                   | 1980 |
| 1            | RC12-2         | 23 y  | M | nd             | > 23y  | BL/SF: 46,XY,r(12)(p13.3q24.3)                                                  | 3354616  | Ring chromosome 12                                                                                                                                             | Park JP, Graham JM Jr, Andrews PA, Wurster-Hill DH.                                                             | Am J Med Genet. 1988 Feb;29(2):437-40. doi: 10.1002/ajmg.1320290228.                              | 1988 |
| 1            | RC12-3         | 30 y  | F |                | > 30 y | 46,XX,r(12)(p13.3q24.3)[26]/46,XX[12]                                           | 8725781  | Leiomyoma of uterus in a patient with ring chromosome 12: case presentation and literature review                                                              | Hajianpour MJ, Hajianpour AK, Habibian R, Wohlmuth C.                                                           | Am J Med Genet. 1996 May 17;63(2):335-9. doi: 10.1002/(SICI)1096-                                 | 1996 |
| 1            | RC12-4         | 15 y  | F | nd             |        | 46,XX,r(12)(p13q24.33)[0.98]/45,XX,-12[0.02]                                    | 12599192 | Ring chromosome 12 with variable phenotypic features: clinical report and review of the                                                                        | Parmar RC, Muranjan MN, Kotvaliwale S, Sharma S, Bharucha BA.                                                   | Am J Med Genet A. 2003 Mar 15;117A(3):275-7. doi:                                                 | 2003 |
| 1            | RC12-5         | 7 y   | M | de novo        |        | 46,XY,r(12)(p13.3q24.33)[73]/46,XY,-12[8]/r-var[2]                              | 15930904 | Association of microcephaly and café-au-lait spots in a patient with ring chromosome 12 syndrome                                                               | Zen PR, Pinto LL, Graziadio C, Pereira VB, Paskulin GA.                                                         | Clin Dysmorphol. 2005 Jul;14(3):141-2005 3. doi: 10.1097/00019605-200507000-00007.                | 2005 |
| 1            | RC12-6         | 27 y  | M |                | > 27 y | 46,XY,r(12)(p13q24.3)[0.85]/46,XY                                               | 17880954 | Ring chromosome 12 and severe oligospermia: a case report                                                                                                      | Martin JR, Wold A, Taylor HS.                                                                                   | Fertil Steril. 2008 Aug;90(2):443.e13-5. doi:                                                     | 2008 |
| 1            | RC12-7         | 20 y  | M | de novo        | > 20 y | 46,XY,r912)                                                                     | 20933620 | Ring chromosome 12 with inverted microduplication of 12p13.3 involving the Von Willebrand Factor gene associated with cryptogenic stroke in a young adult male | Nik-Zainal S, Cotter PE, Willatt LR, Abbott K, O'Brien EW.                                                      | Eur J Med Genet. 2011 Jan-Feb;54(1):97-101. doi: 10.1016/j.ejmg.2010.09.014. Epub 2010 Oct 8.     | 2011 |
| <b>7 7</b>   |                |       |   |                |        |                                                                                 |          |                                                                                                                                                                |                                                                                                                 |                                                                                                   |      |
| 1            | RC13-1         | 3 y   | F | mat nl, pat nd |        | 46,XX,r(13)                                                                     | 5096545  | Ring 13 chromosome with normal haptoglobin inheritance                                                                                                         | Hollowell JG, Littlefield LG, Dharmkrong-AT A, Folger GM, Heath                                                 | J Med Genet. 1971 Jun;8(2):222-6. doi: 10.1136/jmg.8.2.222.                                       | 1971 |
| 1            | RC13-2 case 1  | nb    | M |                |        | 46,XY,r(13)                                                                     | 4691554  | Ring chromosome 13 and haptoglobin heterozygosity                                                                                                              | Fitzgerald PH.                                                                                                  | Clin Genet. 1973;4(1):25-7. doi: 10.1111/j.1399-0004.1973.tb01117.x.                              | 1973 |
| 1            | RC13-2 case 2  | 1 y   | F |                |        | 46,XX,r(13)                                                                     | 4691554  |                                                                                                                                                                |                                                                                                                 |                                                                                                   |      |
| 1            | RC13-3         |       |   |                |        |                                                                                 | 4476859  | Ring 13 chromosome in an infant with congenital malformations (author's transl)                                                                                | Kuroki Y, Toyota J.                                                                                             | Jinrui Idengaku Zasshi. 1974 Jun;19(1):77-8.                                                      | 1974 |
| 1            | RC13-4         | 1.2 y | M |                |        | PB/SF: 46,XY,r(13)[0.85/0.82]                                                   | 4140830  | The behavior of ring chromosome 13                                                                                                                             | Hoo JJ, Obermann U, Cramer H.                                                                                   | Humangenetik. 1974;24(3):161-71. doi: 10.1007/BF00283581.                                         | 1974 |
| 1            | RC13-5         | 1 y   | M | de novo        |        | PL/SF: 46,XY,r(13)                                                              | 4140834  | Malformative syndrome with ring chromosome 13                                                                                                                  | Fryns JP, Deoover J, Van den Berghe H.                                                                          | Humangenetik. 1974;24(3):235-40. doi: 10.1007/BF00283592.                                         | 1974 |
| 1            | RC13-6         |       |   |                |        |                                                                                 | 1140815  | Ring chromosome 13 in a polymalformed anencephalic                                                                                                             | Schmid W, Mühlethaler JP, Briner J, Knechtli H.                                                                 | Humangenetik. 1975;27(1):63-6. doi: 10.1007/BF00283507.                                           | 1975 |
| 1            | RC13-7         | 1.5 y | F |                |        | 46,XX,r(13)[0.92]                                                               | 1139790  | Ring chromosome 13 syndrome                                                                                                                                    | Fried K, Rosenblatt M, Mundel G, Krikler R.                                                                     | Clin Genet. 1975 Mar;7(3):203-8. doi: 10.1111/j.1399-0004.1975.tb00320.x.                         | 1975 |

|   |                |             |   |                |            |                                                     |         |                                                                                                                         |                                                                                                                    |                                                                                        |      |
|---|----------------|-------------|---|----------------|------------|-----------------------------------------------------|---------|-------------------------------------------------------------------------------------------------------------------------|--------------------------------------------------------------------------------------------------------------------|----------------------------------------------------------------------------------------|------|
| 1 | RC13-8         | nb          | F | de novo        | > 21 y     | 46,XX,r(13)                                         | 939570  | Parental origin of a ring 13 chromosome in a female with multiple anomalies                                             | Magenis RE, Wyandt HE, Overton KM, Macfarlane J.                                                                   | Hum Genet. 1976 Jul 27;33(2):181-6. doi: 10.1007/BF00281894.                           | 1976 |
| 1 | RC13-9         |             |   |                |            |                                                     | 890095  | Ring 13 chromosome associated with microcephaly, congenital heart defect, intrauterine growth retardation, and abnormal | Lowry RB, Dill FJ.                                                                                                 | Birth Defects Orig Artic Ser. 1977;13(38):216-22.                                      | 1977 |
| 1 | RC13-10        |             |   |                |            |                                                     | 666131  | [Ring chromosome 13 with. 13p. preserved. A case report and review of literature (author's transl)]                     | Benítez J, Ramos MC, Escorihuela R, Hernández Merino H.                                                            | An Esp Pediatr. 1978 Mar;11(3):253-62.                                                 | 1978 |
| 1 | RC13-11        | 2.5 y       | F | de novo        |            | 46,XX,r(13)(p11q34)                                 | 717293  | Ring chromosome 13 in a child with minor dysmorphic features. Irregular phenotypic expression of ring 13 syndrome       | Verma RS, Dosik H, Chowdhry IH, Jhaveri RC.                                                                        | Am J Dis Child. 1978 Oct;132(10):1018-21. doi: 10.1001/archpedi.1978.02120350082018.   | 1978 |
| 1 | RC13-12        | 10 y        | F |                |            | 46,XX,r(13)(p11q34)                                 | 317785  | Some clinical and cytogenetic observations on a ring chromosome 13 (p11 q34)                                            | Hernandez A, Garcia-Cruz D, Plascencia L, Nazara Z, Rivera H, Sanchez-Corona                                       | Ann Genet. 1979;22(4):221-4.                                                           | 1979 |
| 1 | RC13-13        |             |   |                |            |                                                     | 317788  | [Ring chromosome 13 (author's transl)]                                                                                  | Hevia A, Bullon M, Novales A, Fernandez-Novoa C, San Martin V,                                                     | Ann Genet. 1979;22(4):232-3.                                                           | 1979 |
| 1 | RC13-14        | 20 y        | M | mat nl, pat nd |            | 46,XY,r(13)                                         | 7440241 | Prophase analysis of ring chromosome 13--an attempt at phenotype-karyotype correlation                                  | Lagergren M, Börjeson M, Mitelman F.                                                                               | Hereditas. 1980;93(2):231-3. doi: 10.1111/j.1601-5223.1980.tb01363.x.                  | 1980 |
| 1 | RC13-15 case 1 | 5 y         | F |                | > 32 y     | 46,XX,r(13)                                         | 7211840 | Study of two cases of ring 13 chromosome using high-resolution banding                                                  | Jones IM, Palmer CG, Weaver DD, Hodes ME.                                                                          | Am J Hum Genet. 1981 Mar;33(2):252-61.                                                 | 1981 |
| 1 | RC13-15 case 2 | 5 y         | F |                | > 18 y     | 46,XX,r(13)                                         |         |                                                                                                                         |                                                                                                                    |                                                                                        |      |
| 2 | RC13-16        |             |   |                |            |                                                     | 6974524 | Two cases of ring chromosome 13. Chromosome banding patterns and mosaic configuration                                   | Steinbach P, Drews K, Horstmann W, Barbi G, Scholz W.                                                              | Ann Genet. 1981;24(3):152-7.                                                           | 1981 |
|   | RC13-17        |             |   |                |            |                                                     | 7279505 | [Children with ring chromosome 13]                                                                                      | Bliumina MG, Demintseva VS.                                                                                        | Pediatrics. 1981 May;(5):51-2.                                                         | 1981 |
| 1 | RC13-18        |             |   |                |            |                                                     | 7242723 | [A patient with ring chromosome 13]                                                                                     | Hammond A, Bijlsma JB.                                                                                             | Ned Tijdschr Geneesk. 1981 May                                                         | 1981 |
| 1 | RC13-19        | nb          | M |                |            | 46,XY,r(13)(p12q22)                                 | 7332149 | [Ring chromosome 13 and multiple malformations (author's transl)]                                                       | Antich J, Plaza J, Geán E.                                                                                         | An Esp Pediatr. 1981 Nov;15(5):469-73.                                                 | 1981 |
| 1 | RC13-20 case 1 | nb          | F |                |            | 46,XX,r(13)[0.88]                                   | 7129419 | The ring chromosome 13 syndrome                                                                                         | Martin NJ, Harvey PJ, Pearn JH.                                                                                    | Hum Genet. 1982;61(1):18-23. doi: 1982                                                 |      |
| 1 | RC13-20 case 2 | nb          | F |                |            | 46,XX,r(13)[0.88]                                   | 7129419 |                                                                                                                         |                                                                                                                    |                                                                                        |      |
| 1 | RC13-20 case 3 | 3.5 y       | F |                |            | 46,XX,r(13)[0.89]                                   | 7129419 |                                                                                                                         |                                                                                                                    |                                                                                        |      |
| 1 | RC13-21        |             |   |                |            |                                                     | 6604485 | Ring 13 in an adult male with a 13:13 translocation mother                                                              | de Almeida JC, Llerena JC Jr, Gomes DM, Martins RR, Pereira ET.                                                    | Ann Genet. 1983;26(2):112-5.                                                           | 1983 |
| 1 | RC13-22        | pn          | M | de novo        | top        | 46,XY,r(13)(p11q13)                                 | 6657600 | A fetus with a chromosome 13 ring and placenta with chromosome 13 rod/ring mosaicism                                    | Benn A, Warburton D, Byrne JM, Rudelli R, Shonhaut A, Yeboa K,                                                     | Prenat Diagn. 1983 Oct;3(4):297-302. doi: 10.1002/pd.1970030406.                       | 1983 |
| 1 | RC13-23        | 2.5 y       | M | de novo        |            | 46,XY,r(13)(p12q31)                                 | 4076259 | Clinical features in a case with ring chromosome 13                                                                     | Parcheta B, Wisniewski L, Piontek E, Szymanska J, Skawinski W, Wermenski K.                                        | Eur J Pediatr. 1985 Nov;144(4):409-12. doi: 10.1007/BF00441791.                        | 1985 |
| 1 | RC13-24        | 3 m         | F |                |            | 46,XX,r(13)[0.94]                                   | 3806666 | Tissue-specific mosaicism for the stability of a ring 13 chromosome                                                     | McCorquodale MM, Kolacki P, Kurczynski TW, Baugh E.                                                                | J Ment Defic Res. 1986 Dec;30 ( Pt 4):389-99. doi: 10.1111/j.1365-2788.1986.tb01334.x. | 1986 |
| 1 | RC13-25        |             |   |                |            |                                                     | 3504037 | [Retinoblastoma: first case with a ring chromosome 13 in black Africa]                                                  | Diallo JS, Afoutou JM, Balo K.                                                                                     | Rev Int Trach Pathol Ocul Trop Subtrop Sante Publique. 1987;(64):183-6.                | 1987 |
| 1 | RC13-26        |             |   |                |            |                                                     | 3613828 | [Ring chromosome 13 (case report)]                                                                                      | Zergollern L, Barisić I.                                                                                           | Lijec Vjesn. 1987 Apr-May;109(4-5):146-9.                                              | 1987 |
| 1 | RC13-27        |             |   |                |            |                                                     | 2221637 | [Ring chromosome 13 (type I) 45,XY,-13/46,XY,r(13)(p11:q34)]                                                            | Díaz-Cardama Sousa I, Mora Gandarillas I, Vázquez Rodríguez M, Viso Lorenzo A, Alonso Villa MJ, Fernández Toral J. | An Esp Pediatr. 1990 Jun;32(6):556-8.                                                  | 1990 |
| 1 | RC13-28        |             |   |                |            |                                                     | 2077349 | Evidence for involvement of a Robertsonian translocation 13 chromosome in formation of a ring chromosome 13             | Stetten G, Tuck-Muller CM, Blakemore KJ, Wong C, Kazazian HH Jr, Antonarakis SE.                                   | Mol Biol Med. 1990 Dec;7(6):479-84.                                                    | 1990 |
| 1 | RC13-29        | pn, 29 gwk  | M |                | stillbirth | 46,XY,r(13)(p11q21.1)                               | 1433229 | Ring chromosome 13: lack of distinct syndromes based on different breakpoints on 13q                                    | Brandt CA, Hertz JM, Petersen MB, Vogel F, Noer H, Mikkelsen M.                                                    | J Med Genet. 1992 Oct;29(10):704-8. doi: 10.1136/jmg.29.10.704.                        | 1992 |
| 1 | RC13-30        | 5 y         | M |                |            | 46,XY[0.35]/46,XY,r(13)[0.61]/46,XY,dic r(13)[0.04] | 1363214 | Mosaic ring chromosome 13 analyzed by fluorescence in situ hybridization: report of a case                              | Hou JW, Liu CH, Wang TR, Zhu HM, Jiang S, Sciorra LJ, Lee ML.                                                      | J Formos Med Assoc. 1992 Nov;91(11):1108-11.                                           | 1992 |
| 1 | RC13-31        | pn, 20 gwks | M | de novo        | stillbirth | 46,XY,r(13)[5]/45,XY,-13[15]                        | 8260080 | Ultrasonographic prenatal diagnosis of the 13q-syndrome                                                                 | Santolaya J, McCorquodale MM, Torres W, Meyer WJ, Gauthier D, Lemery D.                                            | Fetal Diagn Ther. 1993 Jul-Aug;8(4):261-7. doi: 10.1159/000263837.                     | 1993 |
| 1 | RC13-32        |             |   |                |            |                                                     | 8086666 | Use of chromosome painting for marker chromosome identification in two children with congenital disorders               | Doco-Fenzy M, Navrocki B, Cornillet P, Sabouraud P, Robillard P, Gruson N, Gaillard D, Adnet JJ                    | Bull Assoc Anat (Nancy). 1994 Jun;78(241):9-13. PMID: 8086666.                         | 1994 |

|   |                |       |   |         |                      |                                                            |          |                                                                                                                                                                  |                                                                                                                                            |                                                                                         |      |
|---|----------------|-------|---|---------|----------------------|------------------------------------------------------------|----------|------------------------------------------------------------------------------------------------------------------------------------------------------------------|--------------------------------------------------------------------------------------------------------------------------------------------|-----------------------------------------------------------------------------------------|------|
| 1 | RC13-33        | nb    | M |         | d. 3 y heart failure | 46,XY,r(13)(p11q32)                                        | 9332662  | Ring chromosome 13 with loss of the region D13S317-D13S285: phenotypic overlap with XK syndrome                                                                  | Guala A, Dellavecchia C, Mannarino S, Rognone F, Giglio S, Minelli A, Danesino C.                                                          | Am J Med Genet. 1997 Oct 31;72(3):319-23.                                               | 1997 |
| 1 | RC13-34        |       |   |         |                      |                                                            | 9664214  | Skin pigmentation anomalies in ring chromosome 13                                                                                                                | Fryns JP, Devriendt K, Legius E.                                                                                                           | Genet Couns. 1998;9(2):155-6.                                                           | 1998 |
| 1 | RC13-35        | 3 m   | M | de novo |                      | 46,XY,r(13)(p11q32)/45,XY,-13                              | 9823499  | Ring chromosome 13 in an infant with multiple congenital anomalies and penoscrotal transposition                                                                 | Boduroglu K, Alikasıfoglul M, Tuñçbilek E, Uludogan S.                                                                                     | Clin Dysmorphol. 1998 Oct;7(4):299-301. doi: 10.1097/00019605-199810000-00012.          | 1998 |
| 1 | RC13-36        | nb    | F |         |                      | 46,XX,r(13)                                                | 9881566  | Retinal detachment in an infant with the ring chromosome 13 syndrome                                                                                             | Filous A, Rasková D, Kodet R.                                                                                                              | Acta Ophthalmol Scand. 1998 Dec;76(6):739-41. doi: 10.1034/j.1600-0420.1998.760624.x.   | 1998 |
| 1 | RC13-37        | 1.5 y | F | de novo |                      | 46,XX,r(13)(p11q14)/46,XX,der(13)                          | 9950374  | Molecular and cytogenetic characterisation of an unusual case of partial trisomy/partial monosomy 13 mosaicism: 46,XX,r(13)(p11q14)/46,XX,der(13)t(13;13)(q10;q1 | Gentile M, Buonadonna AL, Cariola F, Fiorente P, Valenzano MC, Guanti G.                                                                   | J Med Genet. 1999 Jan;36(1):77-82.                                                      | 1999 |
| 1 | RC13-38        | 2.5 y | M |         |                      | 46,XY,r(13)                                                | 10951464 | Boy with celiac disease, malformations, and ring chromosome 13 with deletion 13q32-->qter                                                                        | Talvik I, Ounap K, Bartsch O, Ilus T, Uibo O, Talvik T.                                                                                    | Am J Med Genet. 2000 Aug 28;93(5):399-402.                                              | 2000 |
| 1 | RC13-39        | 8 y   | F |         | > 19y                | 46,XX,r(13)                                                | 11032444 | Keratoconus associated with chromosome 13 ring abnormality                                                                                                       | Heaven CJ, Lalloo F, Mchale E.                                                                                                             | Br J Ophthalmol. 2000 Sep;84(9):1079. doi: 10.1136/bjo.84.9.1075d.                      | 2000 |
| 1 | RC13-40        |       |   |         |                      |                                                            | 11412482 | [Ring 13 chromosome]                                                                                                                                             | Moreno García M.                                                                                                                           | An Esp Pediatr. 2001 Jul;55(1):95.                                                      | 2001 |
| 1 | RC13-41        | pn    | F | de novo | top                  | 46,XX,r(13)(p11q32)[0.77]/45,XX,-13[0.23]                  | 11241535 | Prenatal diagnosis of mosaic ring chromosome 13 with anencephaly                                                                                                 | Chen CP, Chern SR, Lee CC, Chen WL, Wang W.                                                                                                | Prenat Diagn. 2001 Feb;21(2):102-5. doi: 10.1002/1097-                                  | 2001 |
| 1 | RC13-42        | nb    | M |         |                      | 47,XY,rr(13)                                               | 11170089 | Boy with bilateral retinoblastoma due to an unusual ring chromosome 13 with activation of a latent centromere                                                    | Morrisette JD, Celle L, Owens NL, Shields CL, Zackai EH, Spinner NB.                                                                       | Am J Med Genet. 2001 Feb 15;99(1):21-8. doi: 10.1002/1096-8628(20010215)99:1<21::aid-   | 2001 |
| 1 | RC13-43        |       |   |         |                      |                                                            | 11273829 | [Ring chromosome 13 and congenital coagulation factor deficiency]                                                                                                | Ruiz Del Prado M, Alfonso Landa J, Cristóbal Navas C, Blázquez Regidor J.                                                                  | An Esp Pediatr. 2001 Apr;54(4):411-2.                                                   | 2001 |
| 1 | RC13-44        | nb    | M |         |                      | 46,XY,r(13)(p11;q34)                                       | 11590457 | Ring chromosome 13 in an Omani infant boy with mental retardation and multiple congenital anomalies                                                              | Venugopalan P, Kenue RK.                                                                                                                   | Saudi Med J. 2001 Sep;22(9):800-3.                                                      | 2001 |
| 1 | RC13-45        |       |   |         |                      |                                                            | 15300643 | [Chromosome analysis and phenotype location analysis on a patient with the karyotype of 45, XX, 13/46, XX, r(13)/46, XX, r(13;13)/47, XX, 2r(13)(p13q32.3)]      | Liang DS, Wu LQ, Long ZG, Pan Q, Dai HP, Xia JH.                                                                                           | Zhonghua Yi Xue Yi Chuan Xue Za Zhi. 2004 Aug;21(4):392-4.                              | 2004 |
| 1 | RC13-46        | 4.5 y | F | mat     | > 21 y mat           | 46,XX,r(13)(p13q34)                                        | 15326636 | Transmission of ring chromosome 13 from a mother to daughter with both having a 46,XX,r(13)(p13q34) karyotype                                                    | Bedoyan JK, Flore LA, Alkatib A, Ebrahim SA, Bawle EV.                                                                                     | Am J Med Genet A. 2004 Sep 1;129A(3):316-20. doi: 10.1002/ajmg.a.30242.                 | 2004 |
| 1 | RC13-47        | 4 m   | M | de novo |                      | 46,XY,r(13)(p11q34)                                        | 16585823 | Ring chromosome 13 in an infant with ambiguous genitalia                                                                                                         | Sankar VH, Phadke SR.                                                                                                                      | Indian Pediatr. 2006 Mar;43(3):258-60.                                                  | 2006 |
| 1 | RC13-48        | nb    | M | de novo |                      | 46,XY,r(13)(p11.1q33)                                      | 18233171 | Chromosome deletions in 13q33-34: report of four patients and review of the literature                                                                           | Walczak-Sztulpa J, Wisniewska M, Latos-Bielenska A, Linné M, Kelbova C, Belitz B, Pfeiffer L, Kalscheuer V, Erdogan F, Kuss AW, Ropers HH, | Am J Med Genet A. 2008 Feb 1;146A(3):337-42. doi: 10.1002/ajmg.a.32127. PMID: 18203171. | 2008 |
| 1 | RC13-49        | 10 m  | M | de novo |                      | 46,XXX,r(13)(p11q34)                                       | 21396087 | Ring chromosome 13 syndrome characterized by high resolution array based comparative genomic hybridization in patient with 47, XYY syndrome: a case report       | Liao C, Fu F, Zhang L.                                                                                                                     | J Med Case Rep. 2011 Mar 11;5:99. doi: 10.1186/1752-1947-5-99.                          | 2011 |
| 1 | RC13-50        |       |   |         |                      |                                                            | 23431756 | A case of ring chromosome 13 with ambiguous genitalia and primary hypothyroidism                                                                                 | Sandal G, Caliskan D, Ormeci AR, Oztas S.                                                                                                  | Genet Couns. 2012;23(4):529-32.                                                         | 2012 |
| 1 | RC13-51        | nb    | M | de novo | d. 2m                | 46,XY,r(13)(p11.2q34)[51]/45,XY,-13[12]/46,XY,dic r(13)[1] | 24052730 | Ring autosomes: some unexpected findings                                                                                                                         | Caba L, Rusu C, Plăiașu 5th, Gug G, Grămescu M, Bujoran C, Ochiană D, Voloșciuc M, Popescu R, Braha E,                                     | Balkan J Med Genet. 2012 Dec;15(2):35-46. doi: 10.2478/bjmg-2013-0005.                  | 2012 |
| 1 | RC13-52        |       |   |         |                      |                                                            | 24032285 | Anal atresia, abnormal genitalia, and absent thumb: congenital malformations associated with mosaic ring chromosome 13                                           | Ocak Z, Ozlu T, Vural M.                                                                                                                   | Genet Couns. 2013;24(2):157-60.                                                         | 2013 |
| 1 | RC13-53 case 1 | 15 y  | M |         |                      | 46,XY,r(13)[40]/45,XY,-13[10]                              | 24032290 | Clinical, cytogenetic and molecular characterization of two cases of mosaic ring                                                                                 | Uwineza A, Pierquin G, Gallez S, Jamar M, Hellin AC, Caberg JH, Bours V.                                                                   | Genet Couns. 2013;24(2):193-200.                                                        | 2013 |
| 1 | RC13-53 case 2 | pn    | M |         | top                  | 46,XY,r(13)(q32q34)[18]/46,XY,dic r(13)[2]                 | 24032290 |                                                                                                                                                                  |                                                                                                                                            |                                                                                         |      |
| 1 | RC13-54        | 6 y   | F |         |                      | 46,XX,r(13)(p13q34)[71]/45,XX,-13[12]/r-var[17]            | 23661454 | Smallest critical region for microcephaly in a patient with mosaic ring chromosome 13                                                                            | Su PH, Chen CP, Su YN, Chen SJ, Lin LL, Chen JY.                                                                                           | Genet Mol Res. 2013 Apr 25;12(2):1311-7. doi: 10.4238/2013.April.25.2.                  | 2013 |

|   |                |        |   |         |              |                                                                        |          |                                                                                                                                                                                      |                                                                                                                                                       |                                                                                                                |      |
|---|----------------|--------|---|---------|--------------|------------------------------------------------------------------------|----------|--------------------------------------------------------------------------------------------------------------------------------------------------------------------------------------|-------------------------------------------------------------------------------------------------------------------------------------------------------|----------------------------------------------------------------------------------------------------------------|------|
| 1 | RC13-55        | pn     | M | de novo | top          | 46,XY,r(13)[33]/45,XY,-13[19]                                          | 23933417 | Prenatal diagnosis and molecular cytogenetic characterization of mosaic ring chromosome 13                                                                                           | Chen CP, Tsai CH, Chern SR, Wu PS, Su JW, Lee CC, Chen YT, Chen WL, Chen LF, Wang W.                                                                  | Gene. 2013 Oct 15;529(1):163-8. doi: 10.1016/j.gene.2013.07.050. Epub 2013 Aug 8.                              | 2013 |
| 1 | RC13-56 case 1 | 3 y    | M | de novo |              | 46,XY,r(13)(p11q34)                                                    | 27625853 | Molecular cytogenetic and phenotypic characterization of ring chromosome 13 in three unrelated patients                                                                              | Abdallah-Bouhjar IB, Mougou-Zerelli S, Hannachi H, Gmidène A, Labalme A, Soyah N, Sanlaville D, Saad A, Elghezal H.                                   | J Pediatr Genet. 2013 Sep;2(3):147-55. doi: 10.3233/PGE-13063.                                                 | 2013 |
| 1 | RC13-56 case 2 | 4 y    | F | de novo |              | 46,XX,r(13)(p11q34)                                                    | 27625853 |                                                                                                                                                                                      |                                                                                                                                                       |                                                                                                                |      |
| 1 | RC13-56 case 3 | 3 y    | M | de novo |              | 46,XY,r(13)(p11q34)                                                    | 27625853 |                                                                                                                                                                                      |                                                                                                                                                       |                                                                                                                |      |
| 1 | RC13-57        | 11 m   | M |         |              | 46,XY,r(13)(p11q34)[0.83]/45,XY,-13[0.17]                              | 24932608 | Ring chromosome 13 and ambiguous genitalia                                                                                                                                           | Ozsu E, Yeşiltepe Mutlu G, Ipekçi B.                                                                                                                  | J Clin Res Pediatr Endocrinol. 2014;6(2):122-4. doi: 10.4274/jcrpe.1194.                                       | 2014 |
| 1 | RC13-58        | 3.5 y  | M | de novo |              | 46,XY,r(13)(p11.2q34)                                                  | 25171325 | A case with a ring chromosome 13 in a cohort of 203 children with non-syndromic autism and review of the cytogenetic literature                                                      | Charalsawadi C, Maisrikhaw W, Praphanphoj V, Wirojanan J, Hansakunachai T, Roongpraiwan R, Sombuntham T, Ruangdaraganon N, Limprasert P.              | Cytogenet Genome Res. 2014;144(1):1-8. doi: 10.1159/000365909. Epub 2014 Aug 23.                               | 2014 |
| 1 | RC13-59        | nb     | M | de novo |              | 46,XY,r(13)(p13q34)[89]/45,XY,-13[5]/46,XY,r(13;13)[7]                 | 25377780 | Molecular and cytogenetic evaluation of a patient with ring chromosome 13 and discordant results                                                                                     | Kaylor J, Alfaro M, Ishwar A, Sailey C, Sawyer J, Zarate YA.                                                                                          | Cytogenet Genome Res. 2014;144(2):104-8. doi: 10.1159/000368649. Epub 2014 Nov 6.                              | 2014 |
| 1 | RC13-60        | nb     | F |         |              | 46,XX,r(13)[77]/45,XX,-13[17]/46,XX,idelic r(13)[6]                    | 25867311 | Postnatal diagnosis of constitutive ring chromosome 13 using both conventional and molecular cytogenetic approaches                                                                  | Minasi LB, Pinto IP, de Almeida JG, de Melo AV, Cunha DM, Ribeiro CL, Silva GP, Brasil MG, Silva DM, da Silva CC, da Cruz AD.                         | Genet Mol Res. 2015 Mar 6;14(1):1692-9. doi: 10.4238/2015.March.6.15.                                          | 2015 |
| 1 | RC13-61 case 1 | 6 m    | F | de novo |              | 47,XX,r(13)(p13q34),+mar                                               | 29518772 | Two Cases with Ring Chromosome 13 at either End of the Phenotypic Spectrum                                                                                                           | Çakmaklı S, Çankaya T, Gürsoy S, Koç A, Kırbyık Ö, Kılıçarslan ÖA, Özer E, Erçal                                                                      | Cytogenet Genome Res. 2017;153(4):175-180. doi:                                                                | 2017 |
| 1 | RC13-61 case 2 | nb     | F | de novo | d. 24 hr top | 46,XX,r(13)(q11q24)                                                    | 29518772 |                                                                                                                                                                                      |                                                                                                                                                       |                                                                                                                |      |
| 1 | RC13-62        | pn     | M | de novo |              | 46,XY,r(13)[114]/45,XY,-13[3]                                          | 29237938 | Molecular and Cytogenetic Characterization of a Fetus with Mosaic Ring Chromosome 13: A Very [Clinical and genetic features of ring chromosome 13 syndrome: an analysis of one case] | Zhao XR, Han X, Wang YL, Hu WJ.                                                                                                                       | Chin Med J (Engl). 2017 Dec 20;130(24):3007-3008. doi: 10.7499/j.issn.1008-8830.2018.06.011.                   | 2017 |
| 1 | RC13-63        | 5 m    | F | de novo |              | 46,XX,r(13)(p11q33)[82]/45,XX,-13[10]/46,XX,r(13;13)(p11q33;p11q33)[8] | 29972124 |                                                                                                                                                                                      | Fan MR, Wang GJ, Yu XY.                                                                                                                               | Zhongguo Dang Dai Er Ke Za Zhi. 2018 Jun;20(6):485-489. doi: 10.7499/j.issn.1008-8830.2018.06.011.             | 2018 |
| 1 | RC13-64        | 17 y   | M |         |              | SF: 46,XY,r(13)[19]/45,XY,-13[2]/46,XY,-13,+mar[1]                     | 30500678 | Induced pluripotent stem cell line, IMGT003-A, derived from skin fibroblasts of an intellectually disabled patient with ring chromosome 13                                           | Nikitina TV, Menzorov AG, Kashevarova AA, Gridina MM, Khabarova AA, Yakovleva YS, Lopatkina ME, Pristiyazhnyuk IE, Vasilyev SA, Serov OL, Lebedev IN. | Stem Cell Res. 2018 Dec;33:260-264. doi: 10.1016/j.scr.2018.11.009. Epub 2018 Nov 20.                          | 2018 |
| 1 | RC13-65        | ? 20 y | F |         | > 20 y       | 46,XX,r(13)(p13q34)[84]/45,XX,-13[9]/46,XX,r(13;13)[5]                 | 30512167 | [Genetic analysis of a patient with premature ovarian failure and a 45,XX,-13/46,XX,r(13)(p13q34)/46,XX,r(13;13) karyotype]                                                          | Yin T, Zheng A, Tan J, Zhang R, Gu Y, Wang L.                                                                                                         | Zhonghua Yi Xue Yi Chuan Xue Za Zhi. 2018 Dec 10;35(6):872-874. doi: 10.3760/cma.j.issn.1003-9406.2018.06.023. | 2018 |
| 1 | RC13-66        | 8 m    | M |         |              | 46,XY,r(13)                                                            | 30907385 | Cromosoma 13 en anillo                                                                                                                                                               | Cammarata-Scalisi F, Briceño Y, Cegarra E, Montilla D.                                                                                                | Bol Med Hosp Infant Mex. 2019;76(2):100-103. doi: 10.24875/BMHIM.18000108.                                     | 2019 |
| 1 | RC13-67 case 1 | nb     | F | de novo |              | 46,XX,r(13)[421/500]                                                   | 31976095 | Towards New Approaches to Evaluate Dynamic Mosaicism in Ring Chromosome 13 Syndrome                                                                                                  | Petter C, Moreira LMA, Riegel M.                                                                                                                      | Case Rep Genet. 2019 Dec 28;2019:7250838. doi: 10.1155/2019/7250838. eCollection 2019.                         | 2019 |
| 1 | RC13-67 case 2 | nb     | M | de novo |              | 46,XY,r(13)[429/500]                                                   | 31976095 |                                                                                                                                                                                      |                                                                                                                                                       |                                                                                                                |      |
| 1 | RC13-67 case 3 | nb     | F | de novo |              | 46,XX,r(13)[421/500]                                                   | 31976095 |                                                                                                                                                                                      |                                                                                                                                                       |                                                                                                                |      |
| 1 | RC13-68        | pn     | M | de novo | top          | 46,XY,r(13)[18]/45,XY,-13[8]/46,XY,-13,+mar[14]                        | 32039781 | Prenatal diagnosis and molecular cytogenetic characterization of mosaicism for r(13), monosomy 13 and idic r(13) by amniocentesis                                                    | Chen CP, Chen CY, Chern SR, Wu PS, Chen SW, Lee CC, Chen LF, Wang W.                                                                                  | Taiwan J Obstet Gynecol. 2020 Jan;59(1):130-134. doi: 10.1016/j.tjog.2019.11.021.                              | 2020 |
| 1 | RC13-69        | pn     | F | de novo | top          | 46,XX,r(13)[12]/45,XX,-13[8]                                           | 34247823 | Prenatal diagnosis of recurrent mosaic ring chromosome 13 of maternal origin                                                                                                         | Chen CP, Chen CY, Chern SR,                                                                                                                           | Taiwan J Obstet Gynecol. 2021 Jul;60(4):771-774                                                                | 2021 |
| 1 | RC13-70        | pn     | F | de novo | top          | 46,XX,r(13)(p11.1q31)[40]/45,XX,-13[10]                                | 33966748 | Prenatal diagnosis of a fetus with mosaic ring chromosome 13: Case report and review of the literature                                                                               | Hu XN, Li LL, Shi QY                                                                                                                                  | Taiwan J Obstet Gynecol. 2021 May;60(3):554-558                                                                | 2021 |
| 1 | RC13-71        | ? 3 y  | M |         |              | 46,XY,r(13)(p11.1q34)                                                  | 34140436 | A Case Study of Ring Chromosome 13 in a Pediatric Patient                                                                                                                            | Okabe A, Palencia D, Trejo-Solis D, Duarte-Martinez A                                                                                                 | J Assoc Genet Technol. 2021;47(2):75-77                                                                        | 2021 |
| 1 | RC13-72        | 3 m    | F |         | > 34 y       | BL (3 y): 46,XX SF(4 y): 46,XX/46,XX,r(13)                             | 33438813 | Lessons from a 30 year follow-up of monozygotic twins with discordant phenotype due to a ring 13 chromosomal mosaicism in one of them                                                | Chanes B, Arriaza M, Lacassie Y                                                                                                                       | Am J Med Genet A. 2021 Apr;185(4):1242-1246                                                                    | 2021 |

|   |                |        |   |         |                                    |         |                                                                                                                             |                                                                                 |                                                                                     |      |
|---|----------------|--------|---|---------|------------------------------------|---------|-----------------------------------------------------------------------------------------------------------------------------|---------------------------------------------------------------------------------|-------------------------------------------------------------------------------------|------|
| 1 | RC14-1, case O | 8 y    | M |         | 46,XY,r(14)                        | 1056013 | Somatic rearrangement of chromosome 14 in human lymphocytes                                                                 | McCaw BK, Hecht F, Harnden DG, Teplitz RL.                                      | Proc Natl Acad Sci U S A. 1975 Jun;72(6):2071-5. doi: 10.1073/pnas.72.6.2071.       | 1975 |
| 1 | RC14-2         |        |   |         |                                    | 302677  | [Ring chromosome 14 in monozygotic twins]                                                                                   | Jalbert P, Sele B, Jalbert H, Sirand L,                                         | Ann Genet. 1977 Mar;20(1):59-62.                                                    | 1977 |
| 1 | RC14-3         |        |   |         |                                    | 305756  | Extended evaluation of previously reported twins with a ring 14 chromosome                                                  | Sparkes RS, Klisak I, Sparkes MC.                                               | Ann Genet. 1977 Dec;20(4):273-5.                                                    | 1977 |
| 1 | RC14-4         |        |   |         |                                    | 614989  | Multiple congenital malformations in a child with ring 14 chromosome                                                        | Dzarlieva R.                                                                    | God Zb Med Fak Skopje. 1977;23:285-91.                                              | 1977 |
| 1 | RC14-5         | 8 m    | F | mat nl  | 46,XX,r(14)                        | 7211367 | Ring chromosome 14 in a mentally retarded girl                                                                              | Iselius L, Ritzén M, Bui TH, Olsson K, Eklöf O.                                 | Acta Paediatr Scand. 1980 Nov;69(6):803-6. doi: 10.1111/j.1651-2227.1980.tb07157.x. | 1980 |
| 1 | RC14-6         | nb     | F | de novo | 46,XX,r(14)(p11q32)                | 6156115 | A ring 14 chromosome with deleted short arm                                                                                 | Amarose AP, Dorus E, Huttenlocher PR,                                           | Hum Genet. 1980;54(2):145-7. doi:                                                   | 1980 |
| 1 | RC14-7         | 8 m    | F | de novo | 46,XX,r(14)(p12q24)                | 7277427 | Ring chromosome 14: a distinct clinical entity                                                                              | Schmidt R, Eviatar L, Nitowsky HM, Wong M, Miranda S.                           | J Med Genet. 1981 Aug;18(4):304-7. doi: 10.1136/jmg.18.4.304.                       | 1981 |
| 1 | RC14-8         | nb     | M |         | 46,XY,r(14)                        | 6977306 | Infant male with ring chromosome 14                                                                                         | Triolo O, Serra A, Bova R, Carlo Stella N, Caruso P.                            | Ann Genet. 1981;24(4):236-8.                                                        | 1981 |
| 1 | RC14-9         | 2.5 y  | F |         | 46,XX,r(14)                        | 7241544 | Inheritance of a ring 14 chromosome                                                                                         | Riley SB, Buckton KE, Ratcliffe SG, Syme J.                                     | J Med Genet. 1981 Jun;18(3):209-13. doi: 10.1136/jmg.18.3.209.                      | 1981 |
| 1 | RC14-10        | 7 m    | M | de novo | 46,XY,r(14)                        | 6170224 | Ring 14 chromosome: association with seizures                                                                               | Lippe BM, Sparkes RS.                                                           | Am J Med Genet. 1981;9(4):301-5. doi: 10.1002/ajmg.1320090406.                      | 1981 |
| 1 | RC14-11        | 12.5 y | F |         | 46,XX,r(14)                        | 6982671 | Ring chromosome 14 syndrome                                                                                                 | Fryns JP, Petit P, Kleczkowska A, De Muelenaere A, ven den Berghe H.            | Ann Genet. 1982;25(3):179-80.                                                       | 1982 |
| 2 | RC14-12        |        |   |         |                                    | 6674412 | Ring chromosome 14. A distinct clinical entity                                                                              | Fryns JP, Kubien E, Kleczkowska A, Nawrocka-Kanska B, Van den Berghe H.         | J Genet Hum. 1983 Dec;31 Suppl 5:367-75.                                            | 1983 |
| 1 | RC14-13        |        |   |         |                                    | 6411044 | [Ocular anomalies in phenotype 46,XY,r(14) (ring chromosome 14)]                                                            | Guillot M, Dufier JL, Perignon F, Lenoir G, de Grouchy J, Pinaudeau Y.          | Arch Fr Pediatr. 1983 May;40(5):433.                                                | 1983 |
| 1 | RC14-14        | 2.5 y  | F |         | 45,XX,r(14)[89/100]                | 6702898 | Ring chromosome 14 and immunoglobulin locus                                                                                 | Krawczun M, Melink G, Cervenka J.                                               | Am J Med Genet. 1984 Feb;17(2):465-9. doi: 10.1002/ajmg.1320170209.                 | 1984 |
| 1 | RC14-15        |        |   |         |                                    | 6609671 | Ring-14 and trisomy 14q in the same child                                                                                   | Pangalos C, Velissariou V, Ghica M,                                             | Ann Genet. 1984;27(1):38-40.                                                        | 1984 |
| 1 | RC14-16        |        |   |         |                                    | 6331796 | [Ring chromosome 14. II. A case report of r(14) mosaicism. The r(14) phenotype]                                             | Rethoré MO, Caille B, Huet de Barochez Y, de Blois MC, Ravel A,                 | Ann Genet. 1984;27(2):91-5.                                                         | 1984 |
| 1 | RC14-17        |        |   |         |                                    | 6331795 | [Ring chromosome 14. I. A case report on homogeneous r(14)]                                                                 | Raoul O, Razavi F, Lescs MC, Bouhanna A.                                        | Ann Genet. 1984;27(2):88-90.                                                        | 1984 |
| 2 | RC14-18        |        |   |         |                                    | 4026139 | [2 new cases of ring chromosome 14]                                                                                         | Caille B, Rethoré MO, Raoul O, Huet de Barochez Y, Dufier JL, Roy C, Harpey JP, | Ann Pediatr (Paris). 1985 May;32(5):441-6.                                          | 1985 |
| 1 | RC14-19        |        |   |         |                                    | 3477901 | Ocular findings in a patient with deletion short arm chromosome 5 (cri du chat) and ring                                    | Clark DI, Howard PJ, Patterson A.                                               | Trans Ophthalmol Soc U K. 1986;105 ( Pt 6):723-5.                                   | 1986 |
| 1 | RC14-20        |        |   |         |                                    | 3620197 | Ring chromosome 14 without deletion                                                                                         | Angelova E, Mitreva B, Toncheva D.                                              | Acta Paediatr Hung. 1987;28(1):59-62.                                               | 1987 |
| 1 | RC14-21        | 3 y    | F | de novo | 46,XX,r(14)                        | 3169736 | Retinal/macular pigmentation in conjunction with ring 14 chromosome                                                         | Howard PJ, Clark D, Dearlove J.                                                 | Hum Genet. 1988 Oct;80(2):140-2. doi: 10.1007/BF00702856.                           | 1988 |
| 1 | RC14-22        | 4.5 y  | M |         | 46,XY,r(14)                        | 2597013 | [Epilepsy in ring chromosome 14 syndrome]                                                                                   | Duarte MH, Lison MP, Ferrari I, Soares LR, Fernandes RM.                        | Arq Neuropsiquiatr. 1989 Jun;47(2):205-11. doi: 10.1590/s0004-282x1989000200013.    | 1989 |
| 0 | RC14-23        |        |   |         |                                    | 2543620 | Molecular characterization of a ring chromosome 14 showing that the PI locus is centromeric to the D14S1 and IGH loci       | Keyeux G, Gilgenkrantz S, Lefranc G, Lefranc MP.                                | Hum Genet. 1989 Jun;82(3):219-22. doi: 10.1007/BF00291158.                          | 1989 |
| 1 | RC14-24        | 6 m    | M | mat     | 46,XY,r(14)                        | 2202211 | Transmission of ring 14 chromosome from mother to two sons                                                                  | Matalon R, Supple P, Wyandt H, Rosenthal IM.                                    | Am J Med Genet. 1990 Aug;36(4):381-5. doi: 10.1002/ajmg.1320360402.                 | 1990 |
| 0 | RC14-24 mat    | 22 y   | F | > 22 y  | 46,XX,r(14)[16]/45,XX,t(14q21q)[9] | 2202211 |                                                                                                                             |                                                                                 |                                                                                     |      |
| 1 | RC14-25        |        | M |         | 46,XY,r(14)                        | 2303262 | Physical mapping of probes within 14q32, a subtelomeric region showing a high recombination frequency                       | Hofker MH, Smith S, Nakamura Y, Teshima I, White R, Cox DW.                     | Genomics. 1990 Jan;6(1):33-8. doi: 10.1016/0888-7543(90)90445-z.                    | 1990 |
| 1 | RC14-26        |        |   |         |                                    | 2288460 | [r14 syndrome without major dysmorphism]                                                                                    | de Blois MC, Caille B, Rethoré MO, Dufier JL, Lejeune J.                        | Ann Genet. 1990;33(3):155-8.                                                        | 1990 |
| 2 | RC14-27        |        |   |         |                                    | 1746891 | Ring chromosome 14 syndrome. Report of two cases, including extended evaluation of a previously reported patient and review | Zelante L, Torricelli F, Calvano S, Mingarelli R, Dallapiccola B.               | Ann Genet. 1991;34(2):93-7.                                                         | 1991 |
| 2 | RC14-28        |        |   |         |                                    | 1462428 | [The ring chromosome 14 syndrome]                                                                                           | Kristensen I, Wieg C, Friedrich UK.                                             | Ugeskr Laeger. 1992 Nov 9;154(46):3248-9.                                           | 1992 |
| 1 | RC14-29        |        |   |         |                                    | 1381073 | [Ring chromosome 14]                                                                                                        | Rudenskaia GE, Pozdniakova EO,                                                  | Pediatrriia. 1992;(3):66-9.                                                         | 1992 |

|   |                  |           |   |         |                   |                                                               |          |                                                                                                                                           |                                                                                                                                                                                                                                                                                                                                                                                                                   |                                                                                                                                                                                    |              |
|---|------------------|-----------|---|---------|-------------------|---------------------------------------------------------------|----------|-------------------------------------------------------------------------------------------------------------------------------------------|-------------------------------------------------------------------------------------------------------------------------------------------------------------------------------------------------------------------------------------------------------------------------------------------------------------------------------------------------------------------------------------------------------------------|------------------------------------------------------------------------------------------------------------------------------------------------------------------------------------|--------------|
| 1 | RC14-30          | 6 m       | F | de novo |                   | 46,XX,r(14)(p13q32.3)                                         | 1443409  | Ring 14 chromosome with complex partial seizures: a case report                                                                           | Shirasaka Y, Ito M, Okuno T, Fujii T, Nozaki K, Mikawa H.                                                                                                                                                                                                                                                                                                                                                         | Brain Dev. 1992 Jul;14(4):257-60. doi: 10.1016/s0387-7604(12)80243-9.                                                                                                              | 1992         |
| 1 | RC14-31          | 5 y       | F |         |                   | 46,XX,r(14)                                                   | 8502366  | [Epilepsy in a child with ring chromosome 14]                                                                                             | Midro AT, Zadrozna-Tolwińska B.                                                                                                                                                                                                                                                                                                                                                                                   | Neurol Neurochir Pol. 1993 Jan; Hum Genet. 1995 May;95(5):495-500. doi: 10.1007/BF00223859.                                                                                        | 1993<br>1995 |
| 1 | RC14-32          | 9 m       | M | de novo |                   | 46,XY,r(14)(p13q32.33)                                        | 7759068  | Molecular analysis redefines three human chromosome 14 deletions                                                                          | Wintle RF, Costa T, Haslam RH, Teshima IE, Cox DW.                                                                                                                                                                                                                                                                                                                                                                |                                                                                                                                                                                    |              |
| 1 | RC14-33          | pn 12 gwk | F | de novo | top               | 46,XX,r(14)/45,XX,-14                                         | 8986702  | Prenatal diagnosis of ring chromosome 14 after intracytoplasmic sperm injection                                                           | Jean M, Rival JM, Mensier A, Mirallié S, Lopes P, Barrière P.                                                                                                                                                                                                                                                                                                                                                     | Fertil Steril. 1997 Jan;67(1):164-5. doi: 10.1016/s0015-0282(97)81874-2.                                                                                                           | 1997         |
| 1 | RC14-34          |           |   |         |                   |                                                               | 9662854  | [Ring chromosome 14: report of a new case]                                                                                                | Campos Tristán C, Casado Duráñez P.                                                                                                                                                                                                                                                                                                                                                                               | An Esp Pediatr. 1998 Jun;48(6):650-651.                                                                                                                                            | 1998         |
| 1 | RC14-35          | 1 m       | M |         |                   | 46,XY,r(14)(p11.2q32.3)/45,XY-14                              | 10029266 | Ring chromosome 14 complicated with complex partial seizures and hypoplastic corpus callosum                                              | Ono J, Nishiike K, Imai K, Otani K, Okada S.                                                                                                                                                                                                                                                                                                                                                                      | Pediatr Neurol. 1999 Jan;20(1):70-2. doi: 10.1016/s0887-8994(98)00099-x.                                                                                                           | 1999         |
| 1 | RC14-36          | 29 y      | F |         | > 29 y            |                                                               | 10714162 | [A case of ring 14 chromosome with ocular manifestations]                                                                                 | Hisatomi T, Kira R, Sakamoto T, Inomata H.                                                                                                                                                                                                                                                                                                                                                                        | Nippon Ganka Gakkai Zasshi. 2000 Feb;104(2):121-4.                                                                                                                                 | 2000         |
| 1 | RC14-37 pt1      | 3 m       | M |         |                   | 46,XY,r(14)(p12q32.33)/45,XY,-14                              | 12919399 | Ring chromosome 14 with localization-related epilepsy: three cases                                                                        | Morimoto M, Usuku T, Tanaka M, Otabe O, Nishimura A, Ochi M,                                                                                                                                                                                                                                                                                                                                                      | Epilepsia. 2003 Sep;44(9):1245-9. doi: 10.1046/j.1528-                                                                                                                             | 2003         |
| 1 | RC14-37 pt2      | 7 m       | M | de novo |                   | 46,XY,r(14)(p11.2q32.33)                                      | 12919399 |                                                                                                                                           |                                                                                                                                                                                                                                                                                                                                                                                                                   |                                                                                                                                                                                    |              |
| 1 | RC14-37 pt3      | 9 m       | M |         |                   | 46,XY,r(14)(p11.2q32.31)                                      | 12919399 |                                                                                                                                           |                                                                                                                                                                                                                                                                                                                                                                                                                   |                                                                                                                                                                                    |              |
| 1 | RC14-38          | 1.5 y     | F | de novo |                   | 46,XX,r(14)[39]/45,XX,-14[11]                                 | 15733381 | [Ring chromosome 14 syndrome: a case report]                                                                                              | Li R, Zhao ZY, Sun LY, Zheng X.                                                                                                                                                                                                                                                                                                                                                                                   | Zhonghua Er Ke Za Zhi. 2004 Dec;42(12):956-7.                                                                                                                                      | 2004         |
| 1 | RC14-39          | 1 y       | M |         |                   | 46,XY,r(14)(p11.2q32.31)[84]/45,XY,-14[10]/46,XY,dic r(14)[6] | 15366814 | Mosaic ring chromosome 14 and monosomy 14 presenting with growth retardation, epilepsy, and blepharophimosis                              | Hou JW.                                                                                                                                                                                                                                                                                                                                                                                                           | Chang Gung Med J. 2004 May;27(5):373-8.                                                                                                                                            | 2004         |
| 1 | RC14-40 HSC27804 | 7 m       | F |         |                   | 46,XX,r(14)(p11.2q32.3)                                       | 16152642 | FISH-mapping of telomeric 14q32 deletions: search for the cause of seizures                                                               | Schlade-Bartusiak K, Costa T, Summers AM, Nowaczyk MJ, Cox DW.                                                                                                                                                                                                                                                                                                                                                    | Am J Med Genet A. 2005 Oct 15;138A(3):218-24. doi:                                                                                                                                 | 2005         |
| 1 | RC14-40 HSC1313  | 7 m       | F |         |                   | 46,XX,r(14)(p11q32)                                           | 16152642 |                                                                                                                                           |                                                                                                                                                                                                                                                                                                                                                                                                                   |                                                                                                                                                                                    |              |
| 1 | RC14-40 HSC1412  | 1 y       | M |         | d. 13 y pneumonia | 46,XY,r(14)(p11q32)                                           | 16152642 |                                                                                                                                           |                                                                                                                                                                                                                                                                                                                                                                                                                   |                                                                                                                                                                                    |              |
| 1 | RC14-40 CC0066   | n/a       | M |         |                   | 46,XY,r(14)                                                   | 16152642 |                                                                                                                                           |                                                                                                                                                                                                                                                                                                                                                                                                                   |                                                                                                                                                                                    |              |
| 1 | RC14-41          | 1.5 y     | F |         |                   | 46,XX,r(14)(p11.2q32.3)                                       | 16951445 | Ring chromosome 14 with epilepsy and development delay                                                                                    | Sheth FJ, Soni N.                                                                                                                                                                                                                                                                                                                                                                                                 | Indian Pediatr. 2006 Aug;43(8):744-5.                                                                                                                                              | 2006         |
| 1 | RC14-42          | 2 y       | M |         |                   | 46,XY,r(14)(p11qter)[72]/46,XY,dic r(14)[18]                  | 17715281 | Mosaic trisomy r(14) associated with epilepsy and mental retardation                                                                      | Tzoufi M, Kanioglou C, Dasoula A, Asproudis I, Tsatsoulis A, Sismani C, Knijnenburg J, van Haeringen A, Hansson KB, Lankester A, Smit MJ, Belfroid RD, Bakker E, Rosenberg C, Castermans D, Thienpont B, Volders K, Crepel A, Vermeesch JR, Schrandt-Stumpel CT, Van de Ven WJ, Steyaert Quenum-Miraillet G, Malan V, Martinovic J, Encha-Razavi F, Aral B, Texier I, Bonnefont JP, Vekemans M,                   | J Child Neurol. 2007 Jul;22(7):869-73. doi: 10.1038/sj.ejhg.5201807. Epub 2007 May;15(5):548-55. doi: 10.1038/sj.ejhg.5201807.                                                     | 2007         |
| 1 | RC14-43          | 4 m       | F | de novo |                   | 46,XX,r(14)[0.95]                                             | 17342151 | Ring chromosome formation as a novel escape mechanism in patients with inverted duplication and terminal deletion                         |                                                                                                                                                                                                                                                                                                                                                                                                                   | Eur J Hum Genet. 2007 May;15(5):548-55. doi: 10.1038/sj.ejhg.5201807. Epub 2007 Oct;16(10):1187-92. doi: 10.1038/ejhg.2008.71. Epub 2008 Oct;16(10):1187-92. doi: 10.1002/pd.1911. | 2007         |
| 1 | RC14-44          | 16 y      | M |         |                   | 46,XY,der(16)der(14)r(14);[38]/45,XY,der(16)[22]              | 18414512 | Position effect leading to haploinsufficiency in a mosaic ring chromosome 14 in a boy with autism                                         |                                                                                                                                                                                                                                                                                                                                                                                                                   |                                                                                                                                                                                    | 2008         |
| 1 | RC14-45          | pn        | F | de novo | top               | 46,XX,r(14)(p11q32.2)[7]/45,XX,-14[7]                         | 18186139 | Prenatal diagnosis of a ring chromosome 14 in a fetus with a severe skeletal dysplasia                                                    | Quenum-Miraillet G, Malan V, Martinovic J, Encha-Razavi F, Aral B, Texier I, Bonnefont JP, Vekemans M,                                                                                                                                                                                                                                                                                                            | Prenat Diagn. 2008 Jan;28(1):69-71. doi: 10.1002/pd.1911.                                                                                                                          | 2008         |
| 1 | RC14-46 case 1   | 4 m       | F |         |                   | 46,XX,r(14)(p13q32)                                           | 19416318 | Ring 14 chromosome presenting as early-onset isolated partial epilepsy                                                                    | Ville D, DE Bellescize J, Nguyen MA, Testard H, Gautier A, Perrier J, Till M,                                                                                                                                                                                                                                                                                                                                     | Dev Med Child Neurol. 2009 Nov;51(11):917-22. doi:                                                                                                                                 | 2009         |
| 1 | RC14-46 case 2   | 3 m       | M |         |                   | 46,XY,r(14)[86]/45,XY,-14[14],                                | 19416318 |                                                                                                                                           |                                                                                                                                                                                                                                                                                                                                                                                                                   |                                                                                                                                                                                    |              |
| 1 | RC14-46 case 3   | 6 m       | M |         |                   | 46,XY,r(14)                                                   | 19416318 |                                                                                                                                           |                                                                                                                                                                                                                                                                                                                                                                                                                   |                                                                                                                                                                                    |              |
| 1 | RC14-46 case 4   | 4 m       | F |         |                   | 46,XX,r(14)                                                   | 19416318 |                                                                                                                                           |                                                                                                                                                                                                                                                                                                                                                                                                                   |                                                                                                                                                                                    |              |
| 1 | RC14-47          | 2 y       | M | de novo | > 30 y            | 46,XY,r(14)(p13q32.33)[0.96]                                  | 20979193 | Cytogenetic and molecular evaluation and 20-year follow-up of a patient with ring chromosome 14                                           | Guilherme RS, de Freitas Ayres Meloni V, Sodrè CP, Christofolini DM, Pellegrino R, de Mello CB, Conlin LK, Hutchinson AL, Spinner NB, Brunoni D, Martinelli P, Orteschi D, Zollino M, Neri G, Falchi M, Pisanò T, Rossino R, Boscarelli F, Stoico G, Milia A, Montaldo C, Cianchetti C, Pruna D, Specchio N, Trivisano M, Serino D, Cappelletti S, Carotenuto A, Claps D, Marras CE, Fusco L, Elia M, Vigevano F. | Am J Med Genet A. 2010 Nov;152A(11):2865-9. doi: 10.1002/ajmg.a.33689.                                                                                                             | 2010         |
| 1 | RC14-48          | 1 y       | M |         |                   | 46,XY,r(14)[80]/45,XY,-14[20]                                 | 20643614 | Partial epilepsy complicated by convulsive and nonconvulsive episodes of status epilepticus in a patient with ring chromosome 14 syndrome |                                                                                                                                                                                                                                                                                                                                                                                                                   | Epileptic Disord. 2010 Sep;12(3):222-7. doi: 10.1684/epd.2010.0324. Epub 2010 Sep;12(3):222-7. doi: 10.1684/epd.2010.0324.                                                         | 2010         |
| 1 | RC14-49          | 6 m       | M |         |                   | 46,XY,r(14)(p13q32)[48]/46,XY,dup r(14)[2]                    | 20034090 | Ring chromosome 14 mosaicism: an unusual case associated with developmental delay and epilepsy, characterized by genome array-CGH         | Nucaro AL, Falchi M, Pisanò T, Rossino R, Boscarelli F, Stoico G, Milia A, Montaldo C, Cianchetti C, Pruna D, Specchio N, Trivisano M, Serino D, Cappelletti S, Carotenuto A, Claps D, Marras CE, Fusco L, Elia M, Vigevano F.                                                                                                                                                                                    | Am J Med Genet A. 2010 Jan;152A(1):234-6. doi: 10.1002/ajmg.a.33167.                                                                                                               | 2010         |
| 1 | RC14-50 case 1   | 8 m       | F |         |                   | 46,XX,r(14)(p11q32.33)                                        | 23159383 | Epilepsy in ring 14 chromosome syndrome                                                                                                   | Specchio N, Trivisano M, Serino D, Cappelletti S, Carotenuto A, Claps D, Marras CE, Fusco L, Elia M, Vigevano F.                                                                                                                                                                                                                                                                                                  | Epilepsy Behav. 2012 Dec;25(4):585-92. doi: 10.1016/j.yebeh.2012.09.032. Epub 2012 Apr 14.                                                                                         | 2012         |
| 1 | RC14-50 case 2   | 9 m       | M |         |                   | 46,XY,r(14)(p11q32)[28]/45,XY,-14[4]                          | 23159383 |                                                                                                                                           |                                                                                                                                                                                                                                                                                                                                                                                                                   |                                                                                                                                                                                    |              |
| 0 | RC14-51          |           |   |         |                   |                                                               | 22564756 | The ring 14 syndrome                                                                                                                      | Zollino M, Ponzi E, Gobbi G, Neri G.                                                                                                                                                                                                                                                                                                                                                                              | Eur J Med Genet. 2012 May;55(5):374-80. doi: 10.1016/j.ejmg.2012.03.009. Epub 2012 Apr 14.                                                                                         | 2012         |

|   |         |     |   |         |                              |                                           |                                                                                                                                                  |                                                                                                                                                                                                  |                                                                                                                |                                                                                               |      |
|---|---------|-----|---|---------|------------------------------|-------------------------------------------|--------------------------------------------------------------------------------------------------------------------------------------------------|--------------------------------------------------------------------------------------------------------------------------------------------------------------------------------------------------|----------------------------------------------------------------------------------------------------------------|-----------------------------------------------------------------------------------------------|------|
| 0 | RC14-52 | nb  | M |         | Not a r(14) case             | 22488736                                  | A child with an inherited 0.31 Mb microdeletion of chromosome 14q32.33: further delineation of a critical region for the 14q32 deletion syndrome | Holder JL Jr, Lotze TE, Bacino C, Cheung SW.                                                                                                                                                     | Am J Med Genet A. 2012 Aug;158A(8):1962-6. doi: 10.1002/ajmg.a.35289. Epub 2012 Apr 9.                         | 2012                                                                                          |      |
| 1 | RC14-53 | pn  | M | de novo | top                          | 46,XY,r(14)(p11.2q32.33)[27]/45,XY,-14[3] | 23198189                                                                                                                                         | Prenatal diagnosis of a fetus with congenital heart defect and ring chromosome 14                                                                                                                | Sánchez J, García-Díaz L, Chinchón D, Antiñolo G.                                                              | Case Rep Genet. 2012;2012:794075. doi: 10.1155/2012/794075. Epub 2012 Nov 5.                  | 2012 |
| 1 | RC14-54 | 3 m | M |         |                              | 46,XY,r(14)                               | 26171345                                                                                                                                         | A Case of Autism with Ring Chromosome 14                                                                                                                                                         | Tajeran M, Baghbani F, Hassanzadeh-Giovannini S, Marangio L, Fusco C, Scarano A, Frattini D, Della Giustina E, | Iran J Public Health. 2013 Dec;54(12):2204-13. doi: 10.1111/epi.12393. Epub 2013              | 2013 |
| 0 | RC14-55 |     |   |         |                              |                                           | 24116895                                                                                                                                         | Epilepsy in ring 14 syndrome: a clinical and EEG study of 22 patients                                                                                                                            | Incecik F, Hergüner MO, Mert G, Erdem S, Altunbaşak S.                                                         | Turk J Pediatr. 2013 Sep-Oct;55(5):549-51.                                                    | 2013 |
| 1 | RC14-56 | 6 m | F |         |                              | 46,XX,r(14)                               | 24382541                                                                                                                                         | Ring chromosome 14 syndrome presenting with intractable epilepsy: a case report                                                                                                                  | Ogawa K, Iyoda K.                                                                                              | No To Hattatsu. 2013 Sep;45(5):379-82.                                                        | 2013 |
| 1 | RC14-57 | 2 y | M |         |                              | 46,XY,r(14)(p13q32.3)[28]/45,XY,-14[2]    | 24205694                                                                                                                                         | [The effectiveness of lamotrigine in a case of ring chromosome 14 with refractory epilepsy]                                                                                                      |                                                                                                                |                                                                                               | 2013 |
| 1 | RC14-58 | 9 m | F |         |                              | 46,XX,r(14)(p11.2q32.3)                   | 23610869                                                                                                                                         | Partial epilepsy and developmental delay in infant with ring chromosome 14                                                                                                                       | Imataka G, Noguchi M, Tsukada K, Takahashi T, Yamanouchi H, Arisaka O.                                         | Genet Couns. 2013;24(1):81-3.                                                                 | 2013 |
| 0 | RC14-59 |     |   |         |                              |                                           | 24779649                                                                                                                                         | Developing with ring 14 syndrome: a survey in different countries                                                                                                                                | Zampini L, Zanchi P, D'Odorico L.                                                                              | Clin Linguist Phon. 2014 Nov;28(11):844-56. doi: 10.1186/s13039-015-0129-4. eCollection 2015. | 2014 |
| 1 | RC14-60 | 2 m | F |         | > 18 y                       | 47,XX,del(14)(q21q32.1),+(14)             | 25901181                                                                                                                                         | Dysregulation of FOXP1 by ring chromosome 14                                                                                                                                                     | Alosi D, Klitten LL, Bak M, Hjalgrim H, Møller RS, Tommerup N.                                                 | Mol Cytogenet. 2015 Apr 9;8:24. doi: 10.1186/s13039-015-0129-4. eCollection 2015.             | 2015 |
| 1 | RC14-61 | nb  | F |         |                              | 46,XX,r(14)[0.95]                         | 26773965                                                                                                                                         | Expanding the ocular phenotype of 14q terminal deletions: A novel presentation of microphthalmia and coloboma in ring 14 syndrome with associated 14q32.31 deletion and review of the literature | Salter CG, Baralle D, Collinson MN, Self JE.                                                                   | Am J Med Genet A. 2016 Apr;170A(4):1017-22. doi: 10.1002/ajmg.a.37436. Epub 2016 Jan 15.      | 2016 |
| 0 | RC14-62 |     |   |         |                              |                                           | 26315457                                                                                                                                         | Position effect modifying gene expression in a patient with ring chromosome 14                                                                                                                   | Guilherme RS, Moysés-Oliveira M, Dantas AG, Meloni VA, Colovati ME,                                            | J Appl Genet. 2016 May;57(2):183-7. doi: 10.1007/s13353-015-0311-8.                           | 2016 |
| 1 | RC14-63 | 1 y | M |         | d. 12 y, multi-organ failure | 46,XY,r(14)(p12q32)                       | 28899459                                                                                                                                         | [Ring 14 chromosome syndrome in a boy mainly manifesting as drug-resistant epilepsy]                                                                                                             | Chen C, Wu LW, He F, Yang LF, Miao P, Ma YP, Wang XL, Peng J.                                                  | Zhongguo Dang Dai Er Ke Za Zhi. 2017 Sep;19(9):949-951. doi: 10.7499/j.issn.1008-             | 2017 |
| 1 | RC14-64 | 7 m | F |         |                              | 46,XX,r(14)(p12q32)                       | 28124115                                                                                                                                         | Developmental trends of communicative skills in children with chromosome 14 aberrations                                                                                                          | Zampini L, Zanchi P, Rinaldi B, Novara F, Zuffardi O.                                                          | Eur J Pediatr. 2017 Apr;176(4):455-464. doi: 10.1007/s00431-017-2859-2. Epub 2017 Jan 25.     | 2017 |
| 1 | RC14-65 |     |   |         |                              |                                           | 28387189                                                                                                                                         | Enamel Pit Defects and Taurodontism in a Patient with Ring Chromosome 14 and 47,XXX                                                                                                              | Townsend JA, Lacour L, Scheuerle AE.                                                                           | J Dent Child (Chic). 2017 Jan 15;84(1):39-43.                                                 | 2017 |
| 1 | RC14-66 | 5 y | F |         |                              | 46,XX,r(14)(p11.1q32.3)                   | 31755799                                                                                                                                         | Multimodal imaging of ring 14 syndrome associated maculopathy                                                                                                                                    | Vasconcelos HM Jr, Vargas ME, Pennesi ME.                                                                      | Ophthalmic Genet. 2019 Dec;40(6):541-544. doi: 10.1007/s13353-015-0311-8.                     | 2019 |

**73 66**

|   |               |       |   |                |        |                                    |         |                                                                                        |                                                                        |                                                                                  |      |
|---|---------------|-------|---|----------------|--------|------------------------------------|---------|----------------------------------------------------------------------------------------|------------------------------------------------------------------------|----------------------------------------------------------------------------------|------|
| 1 | RC15-1        |       |   |                |        |                                    | 4539486 | [Ring 15 chromosome: r(15). Identification by controlled denaturation]                 | Forabosco A, Dutrillaux B, Vassoler G, Lejeune J.                      | Ann Genet. 1972 Dec;15(4):267-70.                                                | 1972 |
| 1 | RC15-2        | 2 y   | F | de novo        |        | 46,XX,r(15)                        | 50276   | Ring chromosome 15:r(15). Identification by R banding                                  | Stoll C, Juif JG, Luckel JC, Lausecker C.                              | Humangenetik. 1975;27(3):259-62. doi: 10.1007/BF00278356.                        | 1975 |
| 1 | RC15-3        | 1.5 y | F |                |        | 46,XX,r(15)                        | 939571  | Ring chromosome 15 in child with a minor dysmorphism of phenotype                      | Rumenić L, Joksimovi i, Anaf M.                                        | Hum Genet. 1976 Jul 27;33(2):187-8. doi: 10.1007/BF00281895.                     | 1976 |
| 1 | RC15-4        |       |   |                |        |                                    | 600224  | [The r(15) syndrome (ring chromosome 15). Description of a case]                       | Ferrante E, Boscherini B, Bruni L, Vignetti P, Finocchi G.             | Minerva Pediatr. 1977 Nov 17;29(36):2163-8.                                      | 1977 |
| 1 | RC15-5        | 5 y   | F |                |        | 46,XX,r(15)(p11q26)[95/100]        | 732019  | Ring chromosome 15; 46,XX,r(15) (p11q26) in a girl                                     | Fujita H, Matsumoto H.                                                 | Jinru I dengaku Zasshi. 1978 Sep;23(3):233-7. doi: 10.1007/BF01872473.           | 1978 |
| 1 | RC15-6        | 2 y   | F | de novo        |        | 46,XX,r(15)                        | 649157  | Analysis of banding patterns and mosaic configurations in a case of ring chromosome 15 | Schmid M, Henrichs I, Nestler H, Knörr-Gärtner H, Teller WM, Krone W.  | Hum Genet. 1978 Apr 24;41(3):289-99. doi: 10.1007/BF00284763.                    | 1978 |
| 1 | RC15-7        |       |   |                |        |                                    | 625984  | [Ring chromosome 15 in a child (author's transl)]                                      | Scheibenreiter S, Frisch H.                                            | Wien Klin Wochenschr. 1978 Jan 6;90(1):22-5.                                     | 1978 |
| 1 | RC15-8 case 1 | 3 m   | F | de novo        |        | 46,XX,r(15)                        | 500090  | Ring chromosome 15 syndrome                                                            | Fryns JP, Timmermans J, Hondt FD, François B, Emmery L, van den Berghe | Hum Genet. 1979 Sep 2;51(1):43-8. doi: 10.1007/BF00278290.                       | 1979 |
| 1 | RC15-8 case 2 | 6.5 y | F | de novo        |        | 46,XX,r(15)                        | 500090  |                                                                                        |                                                                        |                                                                                  |      |
| 1 | RC15-9        | 2 y   | M |                | > 37 y | 46,XY,r(15)[41/45]/45,XY,-15[4/45] | 7449181 | Ring chromosome 15 in a male adult with radial defects. Evaluation of the phenotype    | Meinecke P, Koske-Westphal T.                                          | Clin Genet. 1980 Dec;18(6):428-33. doi: 10.1111/j.1399-0004.1980.tb01788.x.      | 1980 |
| 1 | RC15-10       | 4 m   | F | mat nl, pat nd |        | 46,XX,r(15)                        | 7405920 | Ring chromosome 15 and failure to thrive                                               | Kousseff BG.                                                           | Am J Dis Child. 1980 Aug;134(8):798-9. doi: 10.1001/archpedi.1980.0213020066022. | 1980 |

|   |               |        |   |                |                    |                                                                    |         |                                                                                                                                                 |                                                                                          |                                                                                        |      |
|---|---------------|--------|---|----------------|--------------------|--------------------------------------------------------------------|---------|-------------------------------------------------------------------------------------------------------------------------------------------------|------------------------------------------------------------------------------------------|----------------------------------------------------------------------------------------|------|
| 1 | RC15-11       | 1 y    | F | de novo        |                    | 46,XX,r(15)                                                        | 6156798 | Ring chromosome 15: phenotype, Ag-NOR analysis, secondary aneuploidy, and associated chromosome instability                                     | Ledbetter DH, Riccardi VM, Au WW, Wilson DP, Holmquist GP.                               | Cytogenet Cell Genet. 1980;27(2-3):111-22. doi: 10.1159/000131472.                     | 1980 |
| 1 | RC15-12       |        |   |                |                    |                                                                    | 6929984 | A ring 15 chromosome in a girl with minor abnormalities                                                                                         | Gardner RJ, Chewings WE, Holdaway MD.                                                    | N Z Med J. 1980 Mar 12;91(655):173-4.                                                  | 1980 |
| 1 | RC15-13       |        |   |                |                    |                                                                    | 7270144 | Ring chromosome 15 syndrome                                                                                                                     | Fryns JP, Jaeken J, Devlieger H, Debucquoy P, Eggermont E, Van den Berghe H.             | Acta Paediatr Belg. 1981 Jan-Mar;34(1):47-9.                                           | 1981 |
| 1 | RC15-14       | 3 y    | F | de novo        |                    | 46,XX,r(15)                                                        | 7228035 | Ring (15) chromosome                                                                                                                            | Yunis E, Leibovici M, Quintero L.                                                        | Hum Genet. 1981;57(2):207-9. doi:                                                      | 1981 |
| 1 | RC15-15       |        |   |                |                    |                                                                    | 7116681 | Primary gonadal hypoplasia and dysmorphic features in ring chromosome 15 syndrome                                                               | László J, Gaál M, Bösze P.                                                               | Clin Genet. 1982 May;21(5):351.                                                        | 1982 |
| 1 | RC15-16       | 33 y   | M | nd             |                    | 46,XY,r(15)[0.92]/46,XY[0.05]/45,XY,-15[0.02]                      | 7105474 | Ring chromosome 15: report of a case in an infertile man                                                                                        | Moreau N, Teyssier M.                                                                    | Clin Genet. 1982 Apr;21(4):272-9. doi: 10.1111/j.1399-0004.1982.tb00763.x              | 1982 |
| 1 | RC15-17       |        |   |                |                    |                                                                    | 7170952 | Ring chromosome 15                                                                                                                              | Kiss P, Osztovcics M.                                                                    | Acta Paediatr Acad Sci Hung.                                                           | 1982 |
| 1 | RC15-18       | 10.5 y | M | mat            |                    | 46,XY,r(15)                                                        | 6220608 | A boy with ring chromosome 15 derived from a t(15q;15q) Robertsonian translocation in the mother: cytogenetic and biochemical findings          | Neri G, Ricci R, Pelino A, Bova R, Tedeschi B, Serra A.                                  | Am J Med Genet. 1983 Feb;14(2):307-14. doi: 10.1002/ajmg.1320140211.                   | 1983 |
| 1 | RC15-19       | nb     | F | de novo        |                    | 46,XX,r(15)                                                        | 6468449 | Dysplastic features, growth retardation, malrotation of the gut, and fatal ventricular septal defect in a 4-month-old girl with ring chromosome | Otto J, Back E, Fürste HO, Abel M, Böhm N, Pringsheim W.                                 | Eur J Pediatr. 1984 Aug;142(3):229-31. doi: 10.1007/BF00442457.                        | 1984 |
| 1 | RC15-20       | 3.5 y  | M | de novo        |                    | 46,XY,r(15)[126]/45,XY,-15[3]/r-var[8]                             | 4040173 | Phenotypic delineation of ring chromosome 15 and Russell-Silver syndromes                                                                       | Wilson GN, Sauder SE, Bush M, Beitins IZ.                                                | J Med Genet. 1985 Jun;22(3):233-6. doi: 10.1136/jmg.22.3.233.                          | 1985 |
| 1 | RC15-21       | 7 m    | M | de novo        |                    | 46,XY,r(15)[126]/45,XY,-15[3]/r-var[8]                             | 3962666 | Severe growth failure associated with atrophic intestinal mucosa and ring chromosome 15                                                         | Kosztolányi G, Pap M.                                                                    | Acta Paediatr Scand. 1986 Mar;75(2):326-31. doi: 10.1111/j.1651-2227.1986.tb10209.x    | 1986 |
| 1 | RC15-22       |        |   |                |                    |                                                                    | 3487276 | Ring chromosome 15 syndrome. Further delineation of the adult phenotype                                                                         | Fryns JP, Kleczkowska A, Buttiens M, Jonckheere P, Brouckmans-Buttiens K, Kosztolányi G. | Ann Genet. 1986;29(1):45-8.                                                            | 1986 |
| 0 | RC15-23 pt2   |        |   |                |                    |                                                                    | 3674110 | Decreased cell viability of fibroblasts from two patients with a ring chromosome: an in vitro reflection of growth failure?                     | Fujimaki W, Baba K, Tataru K, Umezu R, Kusakawa S, Mashima Y.                            | Am J Med Genet. 1987 Sep;28(1):181-4. doi: 10.1002/ajmg.1320280125.                    | 1987 |
| 1 | RC15-24       | nb     | ? | mat            | d. 4 m aneurysms   | 46,XX,r(15)                                                        | 3596600 | Ring chromosome 15 in a mother and her children                                                                                                 | Fujimaki W, Baba K, Tataru K, Umezu R, Kusakawa S, Mashima Y.                            | Hum Genet. 1987 Jul;76(3):302. doi: 10.1007/BF00283630.                                | 1987 |
| 0 | RC15-24 mat   | 28 y   | F | mother         | > 33 y             | 46,XX,r(15)                                                        |         |                                                                                                                                                 |                                                                                          |                                                                                        |      |
| 1 | RC15-25 pt1   | nb     | F | de novo        |                    | 46,XX,r(15)                                                        | 3063822 | Psychological findings in three children with ring 15 chromosome                                                                                | Borghgraef M, Fryns JP, Van den Berghe H.                                                | J Ment Defic Res. 1988 Aug;32 ( Pt 4):337-47. doi: 10.1111/j.1365-2788.1988.tb01422.x. | 1988 |
| 1 | RC15-25 pt2   | 9.5 y  | F |                |                    | 46,XX,r(15)                                                        | 3063822 |                                                                                                                                                 |                                                                                          |                                                                                        |      |
| 1 | RC15-25 pt3   | 6.5 y  | F | de novo        |                    | 46,XX,r(15)                                                        | 3063822 |                                                                                                                                                 |                                                                                          |                                                                                        |      |
| 1 | RC15-26 pt1   | nb     | M | de novo        |                    | 46,XY,r(15)(p11q26)[19]/45,XY,-15[3]                               | 3278612 | Two patients with ring chromosome 15 syndrome                                                                                                   | Butler MG, Fogo AB, Fuchs DA, Collins FS, Dev VG, Phillips JA 3rd.                       | Am J Med Genet. 1988 Jan;29(1):149-54. doi: 10.1002/ajmg.1320290119.                   | 1988 |
| 1 | RC15-26 pt2   | 3.5 y  | F | de novo        |                    | 46,XX,r(15)(p11q26)[0.80]/45,XX,-15[0.2]                           | 3278612 |                                                                                                                                                 |                                                                                          |                                                                                        |      |
| 1 | RC15-27       | pn     | M | mat nl, pat nd | stillborn, 38 gwks | 46,XY,r(15)(p11q26)                                                | 2746621 | Ring chromosome 15 in a patient with features of Fryns' syndrome                                                                                | de Jong G, Rossouw RA, Retief AE.                                                        | J Med Genet. 1989 Jul;26(7):469-70. doi: 10.1136/jmg.26.7.469.                         | 1989 |
| 1 | RC15-28       | 12 y   | M | de novo        |                    | 46,XY,r(15)(p12q26.3)                                              | 2358298 | A case of ring chromosome 15 accompanied by almost normal intelligence                                                                          | Kitatani M, Takahashi H, Ozaki M, Okino E, Maruoka T.                                    | Hum Genet. 1990 Jun;85(1):138-9. doi: 10.1007/BF00276343.                              | 1990 |
| 3 | RC15-29       |        |   |                |                    |                                                                    | 2081000 | Ring chromosome 15: follow-up data on physical and psychological development                                                                    | Fryns JP, Borghgraef M, Kleczkowska A, Van Den Berghe H.                                 | Genet Couns. 1990;1(2):167-72.                                                         | 1990 |
| 1 | RC15-30       | 30 y   | F | nd             | > 60 y             | 46,XX,15qs+[0.38>0.60]/46,XX,r(15)[0.48>0.38],45,XX,-15[0.14>0.02] | 1746611 | Ring chromosome 15 and 15qs+ mosaic: clinical and cytogenetic behaviour spanning 29 years                                                       | Smith A, den Dulk G, Viersbach R, Michas J.                                              | Am J Med Genet. 1991 Sep 15;40(4):460-3. doi: 10.1002/ajmg.1320400417.                 | 1991 |
| 1 | RC15-31, PW66 | 12 y   | F |                |                    | 46,XX,r(16)                                                        | 1684085 | Molecular, cytogenetic, and clinical investigations of Prader-Willi syndrome patients                                                           | Robinson WP, Bottani A, Xie YG, Balakrishnan J, Binkert F, Mächler M,                    | Am J Hum Genet. 1991 Dec;49(6):1219-34.                                                | 1991 |
| 1 | RC15-32       | 2 y    |   | mat            |                    | 46,XY,r(15)(p12q26.3)                                              | 1576754 | Familial occurrence of ring chromosome 15                                                                                                       | Horigome Y, Kondo I, Kuwajima K, Suzuki T.                                               | Clin Genet. 1992 Apr;41(4):178-80. doi: 10.1111/j.1399-0004.1992.tb03659.x.            | 1992 |
| 0 | RC15-32 mat   | 43 y   | F |                | > 43 y             | 46,XX,r(15)(p12q26.3)                                              | 1576754 |                                                                                                                                                 |                                                                                          |                                                                                        |      |
| 1 | RC15-33       | 11 y   | F | de novo        |                    | 46,XX,r(15)(p12q26.3)                                              | 7506614 | Ring chromosome 15 involving deletion of the insulin-like growth factor 1 receptor gene in a patient with features of Silver-Russell syndrome   | Tamura T, Tohma T, Ohta T, Soejima H, Harada N, Abe K, Niikawa N.                        | Clin Dysmorphol. 1993 Apr;2(2):106-13.                                                 | 1993 |
| 1 | RC15-34       | nb     | M |                |                    | 46,XY,r(15)(p11.2q26.2)                                            | 7545237 | Good growth response to growth hormone treatment in the ring chromosome 15 syndrome                                                             | Nuutinen M, Kouvalainen K, Knip M.                                                       | J Med Genet. 1995 Jun;32(6):486-7. doi: 10.1136/jmg.32.6.486.                          | 1995 |

|   |                |             |   |                    |                     |          |                                                                                                                                                                                                                                 |                                                                                                                                                         |                                                                                                           |      |
|---|----------------|-------------|---|--------------------|---------------------|----------|---------------------------------------------------------------------------------------------------------------------------------------------------------------------------------------------------------------------------------|---------------------------------------------------------------------------------------------------------------------------------------------------------|-----------------------------------------------------------------------------------------------------------|------|
| 0 | RC15-35 case 1 |             |   |                    |                     | 7789178  | Hemizyosity at the insulin-like growth factor I receptor (IGF1R) locus and growth failure in the ring chromosome 15 syndrome                                                                                                    | Peoples R, Milatovich A, Francke U.                                                                                                                     | Cytogenet Cell Genet. 1995;70(3-4):228-34. doi: 10.1159/000134040.                                        | 1995 |
| 1 | RC15-35 case 2 | 4 y         | M | de novo            |                     | 7789178  |                                                                                                                                                                                                                                 |                                                                                                                                                         |                                                                                                           |      |
| 0 | RC15-35 case 3 |             |   |                    |                     | 7789178  |                                                                                                                                                                                                                                 |                                                                                                                                                         |                                                                                                           |      |
| 0 | RC15-35 case 4 |             |   |                    |                     | 7789178  |                                                                                                                                                                                                                                 |                                                                                                                                                         |                                                                                                           |      |
| 1 | RC15-35 case 5 | 3.5 y       | F | de novo            |                     | 7789178  |                                                                                                                                                                                                                                 |                                                                                                                                                         |                                                                                                           |      |
| 1 | RC15-36        | nb          | F | de novo            | > 24 y              | 8906535  | Ring chromosome 15 syndrome in an adult female                                                                                                                                                                                  | Matsuishi T, Yamada Y, Endo K, Sakai H, Fukushima Y.                                                                                                    | J Intellect Disabil Res. 1996 Oct;40(Pt 5):478-80.                                                        | 1996 |
| 1 | RC15-37 case A | 14 y        | M |                    |                     | 8779316  | Distinct 15q genotypes in Russell-Silver and ring 15 syndromes                                                                                                                                                                  | Rogan PK, Seip JR, Driscoll DJ, Papenhausen PR, Johnson VP, Raskin S, Woodward AL, Butler MG.                                                           | Am J Med Genet. 1996 Mar 1;62(1):10-5. doi: 10.1002/(SICI)1096-                                           | 1996 |
| 1 | RC15-37 case B | 10 y        | M |                    |                     | 8779316  |                                                                                                                                                                                                                                 |                                                                                                                                                         |                                                                                                           |      |
| 1 | RC15-37 case C | 8 y         | M |                    |                     | 8779316  |                                                                                                                                                                                                                                 |                                                                                                                                                         |                                                                                                           |      |
| 1 | RC15-37 case D | 3 y         | F |                    |                     | 8779316  |                                                                                                                                                                                                                                 |                                                                                                                                                         |                                                                                                           |      |
| 1 | RC15-37 case E | 9 m         | M |                    |                     | 8779316  |                                                                                                                                                                                                                                 |                                                                                                                                                         |                                                                                                           |      |
| 1 | RC15-38        | 5 y         | F | de novo            |                     | 10594514 | In vitro and in vivo responses to short-term recombinant human insulin-like growth factor-1 (IGF-I) in a severely growth-retarded girl with ring chromosome 15 and deletion of a single allele for the type 1 IGF receptor gene | de Lacerda L, Carvalho JA, Stannard B, Werner H, Boguszewski MC, Sandrini R, Malozowski SN, Leroith D, Underwood LE.                                    | Clin Endocrinol (Oxf). 1999 Nov;51(5):541-50. doi: 10.1046/j.1365-2265.1999.00799.x.                      | 1999 |
| 1 | RC15-39        | pn, 20 gwks | M | de novo            | top                 | 11746160 | Increased fetal nuchal fold leading to prenatal diagnosis of ring chromosome 15                                                                                                                                                 | Liu YH, Chang SD, Chen FP.                                                                                                                              | Prenat Diagn. 2001 Dec;21(12):1031-3. doi: 10.1002/pd.168.                                                | 2001 |
| 1 | RC15-40        | 2.5 y       | F |                    |                     | 14577679 | A girl with cutaneous hyperpigmentation, café au lait spots and ring chromosome 15 without significant deletion                                                                                                                 | Morava E, Bartsch O, Czako M, Frensel A, Kárteszi J, Kosztolányi GY.                                                                                    | Genet Couns. 2003;14(3):337-42.                                                                           | 2003 |
| 1 | RC15-41        | 5 y         | M | mat                |                     | 12872812 | Maternal transmission of a ring chromosome 15                                                                                                                                                                                   | Nikitina NV, Bushueva OA, Nikolaeva EB, Pavlov GV, Lurie IW.                                                                                            | Genet Couns. 2003;14(2):181-6.                                                                            | 2003 |
| 1 | RC15-42 pt1    | pn          | M | stillborn, 39 gwks |                     | 15384084 | Molecular cytogenetic characterization of ring chromosome 15 in three unrelated patients                                                                                                                                        | Tümer Z, Harboe TL, Blennow E, Kalscheuer VM, Tommerup N,                                                                                               | Am J Med Genet A. 2004 Nov 1;130A(4):340-4. doi:                                                          | 2004 |
| 1 | RC15-42 pt2    | 23 y        | M |                    | > 23 y              | 15384084 |                                                                                                                                                                                                                                 |                                                                                                                                                         |                                                                                                           |      |
| 1 | RC15-42 pt3    | 28 y        | M |                    | > 28 y              | 15384084 |                                                                                                                                                                                                                                 |                                                                                                                                                         |                                                                                                           |      |
| 1 | RC15-43 pt4    | 31 y        | F | de novo            | > 31 y              | 16267671 |                                                                                                                                                                                                                                 |                                                                                                                                                         |                                                                                                           |      |
| 1 | RC15-44        | pn, 18 gwks | F | de novo            | top, 22 gwks        | 17380471 | Molecular characterization of a ring chromosome 15 in a fetus with intra uterine growth retardation and diaphragmatic hernia                                                                                                    | Hatem E, Meriam BR, Walid D, Adenen M, Moez G, Ali S.                                                                                                   | Prenat Diagn. 2007 May;27(5):471-4. doi: 10.1002/pd.1707.                                                 | 2007 |
| 1 | RC15-45        | pn, 11 gwks | F | de novo            | top, 18 gwks        | 19455597 | Prenatal diagnosis of a fetus with ring chromosome 15 characterized by array-CGH                                                                                                                                                | Manolakos E, Vetro A, Kitmirides S, Papoulidis I, Kosyakova N, Mrasek K, Weise A, Agapitos E, Orru S, Peitsidis P, Boente Mdel C, Bazan C, Montanari D. | Prenat Diagn. 2009 Sep;29(9):884-8. doi: 10.1002/pd.2295.                                                 | 2009 |
| 1 | RC15-46 pt1    | 3 y         | F |                    |                     | 21995437 | Cutis tricolor parvimaclata in two patients with ring chromosome 15 syndrome                                                                                                                                                    | Boente Mdel C, Bazan C, Montanari D.                                                                                                                    | Pediatr Dermatol. 2011 Nov-Dec;28(6):670-3. doi: 10.1111/j.1525-1470.2011.01470.x. Epub 2011 Oct 13.      | 2011 |
| 1 | RC15-46 pt2    | 7 m         | F |                    |                     | 21995437 |                                                                                                                                                                                                                                 |                                                                                                                                                         |                                                                                                           |      |
| 1 | RC15-47        | 8 y         | M | de novo            |                     | 23042394 | [Combined spectral karyotyping and microarray-based comparative genomic hybridization for the diagnosis of a case with ring chromosome 15]                                                                                      | Pan M, Choy KW, Liao C, Lau TK.                                                                                                                         | Zhonghua Yi Xue Yi Chuan Xue Za Zhi. 2012 Oct;29(5):562-5. doi: 10.3760/cma.j.issn.1003-9406.2012.05.013. | 2012 |
| 1 | RC15-48        | 7 y         | F | de novo            | > 27 y              | 22958471 | Twenty-year cytogenetic and molecular follow-up of a patient with ring chromosome 15: a case report                                                                                                                             | Guilherme RS, Meloni Vde F, Takeno SS, Pellegrino R, Brunoni D, Kulikowski LD, Melaragno MI.                                                            | J Med Case Rep. 2012 Sep 7;6:283. doi: 10.1186/1752-1947-6-283.                                           | 2012 |
| 1 | RC15-49        | pn, 16 gwks | F | de novo            | top, 20 gwks        | 22482980 | Prenatal diagnosis of mosaic ring chromosome 15 with abnormal maternal serum Down syndrome screening and Dandy-Walker malformation                                                                                              | Tan SJ, Chen CH, Chen CP, Chen CW, Chen CY, Hwang KS.                                                                                                   | Taiwan J Obstet Gynecol. 2012 Mar;51(1):109-11. doi: 10.1016/j.tjog.2012.01.022.                          | 2012 |
| 1 | RC15-50        |             |   |                    |                     | 24551985 | Ring chromosome 15: expanding the phenotype                                                                                                                                                                                     | Eid MM, El-Bassyouni HT, Eid OM, Hamad SA, Elgerzawy A, Zaki MS, El-Britto IS, Regina Silva Herbst S,                                                   | Genet Couns. 2013;24(4):417-25.                                                                           | 2013 |
| 1 | RC15-51        | pn, 22 gwks | F | de novo            | d. at birth 36 gwks | 25389503 | Prenatal diagnosis of a fetus with ring chromosomal 15 by two- and three-dimensional ultrasonography                                                                                                                            | Tedesco GD, Drummond CL, Bussamra LC, Araujo Júnior E, Ruano R, Ruano SH, Aldrighi JM.                                                                  | Case Rep Obstet Gynecol. 2014;2014:495702. doi: 10.1155/2014/495702. Epub 2014 Oct 20.                    | 2014 |
| 1 | RC15-52        | 1.25 y      | F | de novo            |                     | 24991444 | Ophthalmic treatment and vision care of a patient with rare ring chromosome 15: a case report                                                                                                                                   | Puchalska-Niedbał L, Zajaczk S, Petriczko E, Kulik U.                                                                                                   | Case Rep Pediatr. 2014;2014:285132. doi: 10.1155/2014/285132. Epub 2014 Jun 3.                            | 2014 |

|   |             |               |   |         |                                                                                                                                               |          |                                                                                                                      |                                                                                                                                 |                                                                                                                |      |
|---|-------------|---------------|---|---------|-----------------------------------------------------------------------------------------------------------------------------------------------|----------|----------------------------------------------------------------------------------------------------------------------|---------------------------------------------------------------------------------------------------------------------------------|----------------------------------------------------------------------------------------------------------------|------|
| 1 | RC15-53     | 2 m           | M | de novo | 46,XY,r(15)(p11.2q26)                                                                                                                         | 29090019 | Molecular characterization and evaluation of complex rearrangements in a case of ring chromosome 15                  | Tewari S, Lubna N, Shah R, Al-Rikabi ABH, Shah K, Sheth J, Sheth F.                                                             | Mol Cytogenet. 2017 Oct 25;10:38. doi: 10.1186/s13039-017-0339-z. eCollection 2017.                            | 2017 |
| 1 | RC15-54 pt3 | 6 y           | F |         | 46,XX,r(15)(p10q26.2)                                                                                                                         | 28899882 | Chromosome 15 structural abnormalities: effect on IGF1R gene expression and function                                 | Cannarella R, Mattina T., Condorellw R et al.                                                                                   | Endocr Connect 2017 6(7):528-539                                                                               | 2017 |
| 1 | RC15-55     | child         | F | de novo | 46,XX,r(15)(p13q26.3)                                                                                                                         | 28604966 | [Detection of a patient with ring chromosome 15 by low-coverage massively parallel copy number variation sequencing] | Pan Q, Zhang L, Zhang F, Jin X, Hu Y, Zhu L, Cheng L, Zhang Q, Ning Y.                                                          | Zhonghua Yi Xue Yi Chuan Xue Za Zhi. 2017 Jun 10;34(3):406-410. doi: 10.3760/cma.j.issn.1003-9406.2017.03.021. | 2017 |
| 1 | RC15-56     | 1.25 y        | F | de novo | 46,XX,r(15)                                                                                                                                   | 30442194 | Ring chromosome 15 - cytogenetics and mapping arrays: a case report and review of the literature                     | Paz-Y-Miño C, Guevara-Aguirre J, Paz-Y-Miño A, Velarde F, Armendáriz-Castillo J, Yumiceba V, Hernández JM, García JL, Leone PE. | J Med Case Rep. 2018 Nov 16;12(1):340. doi: 10.1186/s13256-018-1879-5.                                         | 2018 |
| 1 | RC15-57     | 3 m           | F | de novo | 46,XX,r(15)                                                                                                                                   | 29658137 | Cutis tricolor parvimaclata in ring chromosome 15 syndrome: A case report                                            | Ribeiro Dias Barroso C, Silveira Gomes L, Abrantes Silvestre V, Yamada Utagawa C.                                               | Pediatr Dermatol. 2018 May;35(3):e204-e205. doi: 10.1111/pde.13497. Epub 2018 Apr 15.                          | 2018 |
| 1 | RC15-58     | 32            | M | mat     | > 32 y                                                                                                                                        | 29223476 | Fecundity in an infertile man with r(15) - a challenge to the current paradigm                                       | Kalantari H, Karimi H, Almadani SN, Fakhri M, Mokhtari P, Gourabi H, Mohseni Meybodi A.                                         | Reprod Biomed Online. 2018 Feb;36(2):210-218. doi: 10.1016/j.rbmo.2017.10.115. Epub 2017 Nov 22.               | 2018 |
| 0 | RC15-58 mat |               | F | mother  | > 67 y                                                                                                                                        | 29223476 |                                                                                                                      |                                                                                                                                 |                                                                                                                |      |
|   |             |               |   |         | 46,XY,r(15)(p13q26.3)mat[45]/ 45,XY,-15[3]/ 47,XY, + idic r(15)(p13q26.3)x2[1]/ 46,XY,idic r(15)(p13q26.3)[1]                                 |          |                                                                                                                      |                                                                                                                                 |                                                                                                                |      |
|   |             |               |   |         | 46,XX,r(15)(p13q26.3)[23]/45,XX,- 15[3]/ 48,XXX,r(15)(p13q26.3)[1]/ 47,XX, + idic r(15)(p13q26.3)x2[1]/ 47,XXX,r(15)(p13q26.3)[1]/ 46,XX,idic |          |                                                                                                                      |                                                                                                                                 |                                                                                                                |      |
| 1 | RC15-59     | adult (>20 y) | M |         | > 20 y                                                                                                                                        | 29063501 | The normality of sperm in an infertile man with ring chromosome 15: a case report                                    | Nishikawa K, Itoi F, Nagahara M, Jose M, Matsunaga A, Ueda J, Iwamoto T.                                                        | J Assist Reprod Genet. 2018 Feb;35(2):251-256. doi: 10.1007/s10815-017-1061-9. Epub 2017 Oct 23.               | 2018 |
| 1 | RC15-60     | 30 y          | F |         | > 30 y                                                                                                                                        | 33218427 | Clinical, cytogenetic and molecular analyses of a rare case with ring chromosome 15 and review of the literature     | Shao HY, Wang HL, Wu H, Liu XY, Miao ZY.                                                                                        | Taiwan J Obstet Gynecol. 2020 Nov;59(6):980-984. doi: 10.1016/j.tjog.2020.09.034.                              | 2020 |
| 1 | RC15-61     |               | F |         |                                                                                                                                               | 33751532 | [Molecular cytogenetic study of a case with ring chromosome 15]                                                      | Zhang J, Yang Y, Zhang J, Wang S, Yao F, Zhang Y, Jiang S.                                                                      | Zhonghua Yi Xue Yi Chuan Xue Za Zhi. 2021 Mar 10;38(3):238-241. doi: 10.3760/cma.j.cn511374-20200214-00080.    | 2021 |
|   |             |               |   |         | 46, XX, r(15)(p11.2q26.3)[92]/45, XX,- 15[9]/46, XX, dic r(15)(p11.2q26.3;p11.2q26.3)[4]                                                      |          |                                                                                                                      |                                                                                                                                 |                                                                                                                |      |
| 1 | RC15-62     | 7 m           | F |         |                                                                                                                                               | 34747577 | The phenotype and rhGH treatment response of ring Chromosome 15 Syndrome: Case report and literature review          | Chen M, Ke X, Liang H                                                                                                           | Mol Genet Genomic Med. 2021 Dec;9(12):e1842                                                                    | 2021 |

75 62

|   |        |       |   |         |        |          |                                                                                                |                                                                           |                                                                            |      |
|---|--------|-------|---|---------|--------|----------|------------------------------------------------------------------------------------------------|---------------------------------------------------------------------------|----------------------------------------------------------------------------|------|
| 1 | RC16-1 | 33 y  | F |         | > 33 y | 7327577  | Ring chromosome 16                                                                             | Neidengard L, Sparkes RS.                                                 | Hum Genet. 1981;59(2):175-7. doi: 10.1007/BF00293072.                      | 1981 |
| 1 | RC16-2 | 3.5 y | F | de novo |        | 2464927  | Developmental delay, short stature, and minor facial anomalies in a child with ring chromosome | Chodirker BN, Ray M, McAlpine PJ, Riordan D, Vust A, Pugh D, Chudley AE.  | Am J Med Genet. 1988 Sep;31(1):145-51. doi:                                | 1988 |
| 1 | RC16-3 | 4.5 y | F |         |        | 2195979  | Ring chromosome 16: a new case                                                                 | Vianello MG, Cottafava F, Bartoli D, Franzone G, Casazzava R, Gastaldi R. | Ann Genet. 1990;33(1):36-9.                                                | 1990 |
| 1 | RC16-4 | 5 y   | M | de novo |        | 9137886  | Delineation of a ring chromosome 16 by the FISH-technique: a case report with review           | Conte RA, Kleyman SM, Kharode C, Verma RS.                                | Clin Genet. 1997 Mar;51(3):196-9. doi: 10.1111/j.1399-0004.1997.tb02452.x. | 1997 |
| 1 | RC16-5 | 4 m   | F | de novo |        | 11807861 | Molecular characterization of a ring chromosome 16 from a patient with bilateral cataracts     | He W, Tuck-Muller CM, Martínez JE, Li S, Rowley ER, Wertelecki W.         | Am J Med Genet. 2002 Jan 1;107(1):12-7. doi: 10.1002/ajmg.10091.           | 2002 |

5 5

|   |        |             |   |         |     |         |                                               |                                                             |                                                                  |      |
|---|--------|-------------|---|---------|-----|---------|-----------------------------------------------|-------------------------------------------------------------|------------------------------------------------------------------|------|
| 1 | RC17-1 | pn, 16 gwks | F | de novo | top | 1150287 | Ring 17 chromosome detected by amniocentesis  | Weinberg AG, Bair JL, Harrod MJ.                            | Humangenetik. 1975 Jul 23;28(3):269-72. doi: 10.1007/BF00278557. | 1975 |
| 1 | RC17-2 | 6 y         | M |         |     | 121681  | Ring chromosome 17 in a mentally retarded boy | Qazi OH, Madahar C, Kanchanapoomi R, Girdharan R, Beller E. | Ann Genet. 1979;22(4):234-8.                                     | 1979 |

|   |                |       |   |         |             |                                                |                                                                                                                  |                                                                                                                                                      |                                                                                                                                           |                                                                                                                                                    |      |
|---|----------------|-------|---|---------|-------------|------------------------------------------------|------------------------------------------------------------------------------------------------------------------|------------------------------------------------------------------------------------------------------------------------------------------------------|-------------------------------------------------------------------------------------------------------------------------------------------|----------------------------------------------------------------------------------------------------------------------------------------------------|------|
| 1 | RC17-3         | 5 m   | M | de novo | 46,XY,r(17) | 7241549                                        | An infant with ring 17 chromosome and unusual dermatoglyphs: a new syndrome?                                     | Carpenter NJ, Leichtman LG, Stamper S, Say B.                                                                                                        | J Med Genet. 1981 Jun;18(3):234-6. doi: 10.1136/jmg.18.3.234.                                                                             | 1981                                                                                                                                               |      |
| 1 | RC17-4         | 4 y   | M | de novo | > 26 y      | 46,XY,r(17)(p13q25)                            | 7048927                                                                                                          | Brief clinical report: ring chromosome 17 in a mentally retarded young man - clinical, cytogenetic, and biochemical investigations                   | Chudley AE, Pabello PD, McAlpine PJ, Nickel BE, Shokeir MH.                                                                               | Am J Med Genet. 1982 Jun;12(2):219-25. doi: 10.1002/ajmg.1320120212.                                                                               | 1982 |
| 1 | RC17-5         | 1 m   | M | de novo |             | 46,XY,r(17)(p13.3q25.3)[92/100]                | 6834189                                                                                                          | Miller-Dieker syndrome: lissencephaly and monosomy 17p                                                                                               | Dobyns WB, Stratton RF, Parke JT, Greenberg F, Nussbaum RL, Ledbetter                                                                     | J Pediatr. 1983 Apr;102(4):552-8. doi: 10.1016/s0022-3476(83)80183-                                                                                | 1983 |
| 0 | RC17-6         |       |   |         |             | 6745939                                        | New chromosomal syndrome: Miller-Dieker syndrome and monosomy 17p13                                              | Stratton RF, Dobyns WB, Airhart SD, Ledbetter DH.                                                                                                    | Hum Genet. 1984;67(2):193-200. doi: 10.1007/BF00273000.                                                                                   | 1984                                                                                                                                               |      |
| 0 | RC17-7 MDS-1   |       |   |         |             | 3189330                                        | Molecular detection of microscopic and submicroscopic deletions associated with Miller-Dieker syndrome           | vanTuinen P, Dobyns WB, Rich DC, Summers KM, Robinson TJ, Nakamura Y, Ledbetter DH.                                                                  | Am J Hum Genet. 1988 Nov;43(5):587-96.                                                                                                    | 1988                                                                                                                                               |      |
| 1 | RC17-8         |       |   |         |             | 2694873                                        | [Ring chromosome 17 and recurring pneumopathy]                                                                   | Lambruschini Ferri N, Ortola Castells ME, Rosell Andreo J, Ballesta Martínez                                                                         | An Esp Pediatr. 1989 Nov;31(5):478-80.                                                                                                    | 1989                                                                                                                                               |      |
| 1 | RC17-9         | 1.5 m | F | de novo | d. 9 m      | 46,XX,r(17)                                    | 1711306                                                                                                          | Miller-Dieker syndrome with ring chromosome 17                                                                                                       | Sharief N, Craze J, Summers D, Butler L, Wood CB.                                                                                         | Arch Dis Child. 1991 Jun;66(6):710-2. doi: 10.1136/adc.66.6.710.                                                                                   | 1991 |
| 1 | RC17-10        |       |   |         |             | 1995042                                        | Flecked retina associated with ring 17 chromosome                                                                | Charles SJ, Moore AT, Davison BC, Dyson HM, Willatt L.                                                                                               | Br J Ophthalmol. 1991 Feb;75(2):125-7. doi: 10.1136/bjo.75.2.125.                                                                         | 1991                                                                                                                                               |      |
| 1 | RC17-11        | 9 y   | F |         |             | 46,XX,r(17)                                    | 1381884                                                                                                          | Ring chromosome 17. Case report and review of the literature                                                                                         | Teysier M, Charrin C, Corgiolu Theuil G, David L.                                                                                         | Ann Genet. 1992;35(2):75-8.                                                                                                                        | 1992 |
| 1 | RC17-12        |       |   |         |             | 8002828                                        | Flecked retina associated with café au lait spots, microcephaly, epilepsy, short stature, and ring 17 chromosome | Gass JD, Taney BS.                                                                                                                                   | Arch Ophthalmol. 1994 Jun;112(6):738-9. doi: 10.1001/archophth.1994.01090180036013.                                                       | 1994                                                                                                                                               |      |
| 1 | RC17-13        | 3 y   | F |         |             | 8986275                                        | Mosaic partial trisomy 17 due to a ring chromosome identified by fluorescence in situ                            | Morrison PJ, Smith NM, Martin KE, Young ID.                                                                                                          | Am J Med Genet. 1997 Jan 10;68(1):50-3.                                                                                                   | 1997                                                                                                                                               |      |
| 1 | RC17-14        | 4 m   | M | de novo |             | 46,XY,r(17)(p13.3q25.3)[43/50]/45,XY,-17(7/50) | 10519353                                                                                                         | Ring chromosome 17 syndrome with monosomy 17 mosaicism: case report and literature review                                                            | Endo A, Uesato T, Minato M, Takada M, Takahashi S, Harada K.                                                                              | Acta Paediatr. 1999 Sep;88(9):1040-3. doi: 10.1080/08035259950168595.                                                                              | 1999 |
| 1 | RC17-15 case 1 | 2 y   | M |         | > 28 y      | 46,XY,r(17)(p13q25)                            | 12974742                                                                                                         | Ring chromosome 17: phenotype variation by deletion size                                                                                             | Shashi V, White JR, Pettenati MJ, Root SK, Bell WL.                                                                                       | Clin Genet. 2003 Oct;64(4):361-5. doi: 10.1034/j.1399-0004.2003.00146.x.                                                                           | 2003 |
| 1 | RC17-15 case 1 | 14 y  | M |         |             | 46,XY,r(17)(p13q25)                            | 12974742                                                                                                         |                                                                                                                                                      |                                                                                                                                           |                                                                                                                                                    |      |
| 1 | RC17-16        | 4 y   | M |         |             | 46,XY,r(17)                                    | 17884758                                                                                                         | Ring chromosome 17 epilepsy may resemble that of ring chromosome 20 syndrome                                                                         | Ricard-Mousnier B, N'Guyen S, Dubas F, Pouplard F, Guichet A.                                                                             | Epileptic Disord. 2007 Sep;9(3):327-31. doi: 10.1684/epd.2007.0121. Epub 2007 Sep 20.                                                              | 2007 |
| 1 | RC17-17        | 4 m   | F | de novo |             | 46,XX,r(17)(p13q25)[83]/45,XX,-17[12]/r-var[5] | 17163520                                                                                                         | A girl with neurofibromatosis type 1, atypical autism and mosaic ring chromosome 17                                                                  | Havlovicova M, Novotna D, Kocarek E, Novotna K, Bendova S, Petrak B,                                                                      | Am J Med Genet A. 2007 Jan 1;143A(1):76-81. doi: 10.1002/ajmg.1320120212.                                                                          | 2007 |
| 1 | RC17-18        |       |   |         |             | 17996402                                       | Molecular cloning and analysis of breakpoints on ring chromosome 17 in a patient with autism                     | Vazna A, Havlovicova M, Sedlacek Z.                                                                                                                  | Gene. 2008 Jan 15;407(1-2):186-92. doi: 10.1016/j.gene.2007.10.009.                                                                       | 2008                                                                                                                                               |      |
| 1 | RC17-19        | 16 y  | M | de novo | > 23 y      | 46,XY,r(17)(p13.3q25)                          | 19197320                                                                                                         | Flecked retina associated with ring 17 chromosome                                                                                                    | Kumari R, Black G, Dore J, Lloyd IC.                                                                                                      | Eye (Lond). 2009 Nov;23(11):2134-5. doi: 10.1038/eye.2008.392. Epub 2009 Sep 7;6(3):256-62. doi: 10.1111/j.1399-0004.2009.01203.x. PMID: 19793054. | 2009 |
| 1 | RC17-20        | 4 y   | M |         |             | 46,XY,r(17)(p13q25)[27]/45,XY,-17[3]           | 19793054                                                                                                         | Mild ring 17 syndrome shares common phenotypic features irrespective of the chromosomal breakpoints location                                         | Surace C, Piazzolla S, Sirlito P, Digilio MC, Roberti MC, Lombardo A, D'Elia G, Tomaiuolo AC, Petrocchi S, Capolino R, El Hachem M, Claps | Clin Genet. 2009 Sep;76(3):256-62. doi: 10.1111/j.1399-0004.2009.01203.x. PMID: 19793054.                                                          | 2009 |
| 0 | RC17-21        |       |   |         |             | 24393457                                       | Telomere shortening and telomere position effect in mild ring 17 syndrome                                        | Surace C, Berardinelli F, Masotti A, Roberti MC, Da Sacco L, D'Elia G, Sirlito P, Digilio MC, Cusmai R, Grotta S, Petrocchi S, Hachem ME, Pisaneschi | Epigenetics Chromatin. 2014 Jan 7;7(1):1. doi: 10.1186/1756-8935-7-1.                                                                     | 2014                                                                                                                                               |      |
| 1 | RC17-22        | 9 y   | F |         |             | 46,XX,r(17)                                    | 25635406                                                                                                         | Ring 17 syndrome: first clinical report without intellectual disability                                                                              | de Palma L, De Carlo D, Lenzini E, Boniver C, Tarantino V, Bacci B, Vecchi                                                                | Epileptic Disord. 2015 Mar;17(1):84-7; quiz 88. doi: 10.1111/j.1399-0004.2014.01203.x. PMID: 25635406.                                             | 2015 |
| 1 | RC17-23        | 4 y   | F |         | > 31 y      | 46,XX,r(17)                                    | 29456482                                                                                                         | Ring Chromosome 17 Not Involving the Miller-Dieker Region: A Case with Drug-Resistant Epilepsy                                                       | Coppola A, Morrogh D, Farrell F, Balestrini S, Hernandez-Hernandez L, Krithika S, Sander JW, Waters JJ,                                   | Mol Syndromol. 2017 Dec;9(1):38-44. doi: 10.1159/000479949. Epub 2017 Sep 15.                                                                      | 2017 |

**21 23**

|   |        |      |   |    |                                                       |             |                                                                       |                                                                                          |                                                              |      |
|---|--------|------|---|----|-------------------------------------------------------|-------------|-----------------------------------------------------------------------|------------------------------------------------------------------------------------------|--------------------------------------------------------------|------|
| 0 | RC18-1 |      |   |    |                                                       | 14242103    | [17-18 RING-CHROMOSOMES AND CONGENITAL MALFORMATIONS IN A YOUNG GIRL] | DE GROUCHY J, LEVEQUE B, DEBAUCHEZ C, SALMON C, LAMY M, Palmer CG, Fareed N, Merritt AD. | Ann Genet. 1964;7:17-23.                                     | 1964 |
| 1 | RC18-2 | 10 y | M | na | BL: 46,XY,r(18)[121]/45,XY,-18[13]<br>46,XY,r(18)[18] | SF: 5619991 | Ring chromosome 18 in a patient with multiple anomalies               | Palmer CG, Fareed N, Merritt AD.                                                         | J Med Genet. 1967 Jun;4(2):117-23. doi: 10.1136/jmg.4.2.117. | 1967 |
| 1 | RC18-3 |      |   |    |                                                       | 5301753     | [An observation of ring chromosome 18 (18r)]                          | De Grouchy J, Herrault A, Cohen-Solal                                                    | Ann Genet. 1968 Mar;11(1):33-8.                              | 1968 |
| 1 | RC18-4 |      |   |    |                                                       | 5747161     | [Ring chromosome 18]                                                  | Hooft C, Haentjens P, Orye E,                                                            | Acta Paediatr Belg. 1968;22(2):69-                           | 1968 |

|   |                |         |   |         |                                |             |                                                                                                                                    |                                                                         |                                                                                   |      |
|---|----------------|---------|---|---------|--------------------------------|-------------|------------------------------------------------------------------------------------------------------------------------------------|-------------------------------------------------------------------------|-----------------------------------------------------------------------------------|------|
| 1 | RC18-5         | 14 y    | F |         | 46,XX,r(18)                    | 4171782     | IgA absence associated with a ring-18 chromosome                                                                                   | Finley SC, Finley WH, Noto TA, Uchida IA, Roddam RF.                    | Lancet. 1968 May 18;1(7551):1095-1096. doi: 10.1016/s0140-6736(68)91453-0.        | 1968 |
| 1 | RC18-6         | 11 y    | M |         | 46,XY,r(18)                    | 4173009     | IgA and ring-18 chromosome                                                                                                         | Richards BW, Hobbs JR.                                                  | Lancet. 1968 Jun 29;1(7557):1426-1427. doi: 10.1016/s0140-6736(68)92001-1.        | 1968 |
| 0 | RC18-7         |         |   |         |                                | 4173760     | IgA and ring-18 chromosome                                                                                                         | Warren RJ.                                                              | Lancet. 1968 Aug 10;2(7563):350. doi: 10.1016/s0140-6736(68)90557-6.              | 1968 |
| 1 | RC18-8         | 12 y    | F | mat     | 46,XX,r(18)                    | 4183928     | Ring chromosome 18 and gamma-M-globulin abnormality                                                                                | Jensen K, Christensen KR, Jacobsen P, Nielsen J, Friedrich U, Tsuboi T. | Lancet. 1969 Aug 30;2(7618):497-8. doi: 10.1016/s0140-6736(69)90206-2.            | 1969 |
| 0 | RC18-8 mat     | 48 y    |   |         | 46,XX,r(18)                    | 4183928     |                                                                                                                                    |                                                                         |                                                                                   |      |
| 1 | RC18-9         |         |   |         |                                | 5308385     | [A new observation of a ring chromosome 18]                                                                                        | Deminatti M, Dupuis C, Maillard E, Delmas-Marsalet Y, Bulteel MF.       | Ann Genet. 1969 Jun;12(2):126-9.                                                  | 1969 |
| 1 | RC18-10        | 10 m    | F |         | 46,XX,r(18)                    | 5365577     | Ring chromosome 18 (46, XX, 18r)                                                                                                   | Cenani A, Pfeiffer RA, Simon HA.                                        | Humangenetik. 1969;7(4):351-2. doi: 10.1007/BF00283558.                           | 1969 |
| 1 | RC18-11        |         |   |         |                                | 5495679     | [Ring chromosome 18]                                                                                                               | Ricci N, Dallapiccola B, Ventimiglia B, Preto G.                        | Acta Genet Med Gemellol (Roma). 1970 Jul;19(3):439-47.                            | 1970 |
| 1 | RC18-12        | 10 y    | M | de novo | 46,XY,r(18)                    | 5512218     | Ring chromosome 18 in a mentally retarded boy                                                                                      | Richards BW, Rundle AT, Zaremba J, Stewart A.                           | J Ment Defic Res. 1970 Jun;14(2):174-86. doi: 10.1111/j.1365-2788.1970.tb01112.x. | 1970 |
| 1 | RC18-13        |         |   |         |                                | 5534732     | Ring chromosome 18 in mother and daughter                                                                                          | Christensen KR, Friedrich U, Jacobsen P, Jensen K, Nielsen J, Tsuboi T. | J Ment Defic Res. 1970 Mar;14(1):49-67. doi: 10.1111/j.1365-2788.1970.tb01112.x.  | 1970 |
| 1 | RC18-14        | 6 y     | F |         | 46,XX,r(18)                    | 5478808     | [Ring-chromosome 18 and IgA deficiency in a 6-year-old girl (46,XX,18r)]                                                           | Murken JD, Salzer G, Kunze D.                                           | Z Kinderheilkd. 1970;109(1):1-10.                                                 | 1970 |
| 2 | RC18-15        |         |   |         |                                | 5313142     | [2 cases of ring 18 chromosome]                                                                                                    | Deminatti M, Debeugny P, Croquette-Bulteel MF, Delmas-Marsalet Y.       | Ann Genet. 1970 Sep;13(3):149-55.                                                 | 1970 |
| 1 | RC18-16        | 2 y     | F |         | 46,XX,r(18)                    | 5091271     | Intestinal nodular lymphoid hyperplasia, hypogammaglobulinemia, and hematologic abnormalities in a child with a ring 18 chromosome | Michaels DL, Go S, Humbert JR, Dubois RS, Stewart JM, Ellis EF.         | J Pediatr. 1971 Jul;79(1):80-8. doi: 10.1016/s0022-3476(71)80062-8.               | 1971 |
| 0 | RC18-17        |         |   |         |                                | 4645993     | [Ring chromosome 18. Clinical study and cytologic considerations]                                                                  | Giovannucci Uzielli ML, Carbone C, Calabri G.                           | Minerva Pediatr. 1972 Oct 20;24(36):1707-14.                                      | 1972 |
| 1 | RC18-18        | nb      | F | de novo | d. 7 wks                       | 46,XX,r(18) | Primary hypoparathyroidism associated with ring chromosome 18                                                                      | Olambiwonno NO, Ebbin AJ, Frasier SD.                                   | J Pediatr. 1972 May;80(5):833-5. doi: 10.1016/s0022-3476(72)80140-9.              | 1972 |
| 1 | RC18-19        | 10.75 y | F | de novo | 46,XX,+r(18)[87]/45,XX,-18[12] | 5025476     | Conenital hypothyroidism in association with a ring chromosome 18                                                                  | Winter JS, Ahluwalia K, Ray M.                                          | J Med Genet. 1972 Mar;9(1):122-6. doi: 10.1136/jmg.9.1.122.                       | 1972 |
| 1 | RC18-20        | 3 m     | F |         | 46,XX,r(18)                    | 4565746     | [Ring chromosome 18. 18p-/18q--deletion-syndrome]                                                                                  | Kunze J, Stephan E, Tolksdorf M.                                        | Humangenetik. 1972;15(4):289-318. doi: 10.1007/BF00281730.                        | 1972 |
| 1 | RC18-21        |         |   |         |                                | 1081367     | A case of ring 18 chromosome in a sibship with multiple spontaneous abortions                                                      | Coco R, Barreiro CZ, Penchaszadeh VB.                                   | Ann Genet. 1975 Jun;18(2):135-7.                                                  | 1975 |
| 1 | RC18-22        |         |   |         |                                | 1246241     | [Ring chromosome 18]                                                                                                               | Kunze J, Spranger J, Tolksdorf M.                                       | Monatsschr Kinderheilkd. 1976                                                     | 1976 |
| 1 | RC18-23        |         |   |         |                                | 555611      | [A child with a ring 18 chromosome : 46,XX,r(18) and a decreased enzymatic activity of erythrocyte peptidase A (author's transl)]  | Serville F, Guillard JM, Junien C, Gauville J.                          | Ann Pediatr (Paris). 1979 Dec;26(10):711-5.                                       | 1979 |
| 1 | RC18-24        |         |   |         |                                | 7418077     | [A mosaic of ring chromosome 18]                                                                                                   | Srsen S, Volna J, Miklerová M.                                          | Cesk Pediatr. 1980 Aug;35(8):419-22.                                              | 1980 |
| 1 | RC18-25        |         |   |         |                                | 6444875     | Selective IgA deficiency: clinical and immunological evaluation of 50 pediatric patients                                           | Burgio GR, Duse M, Monafó V, Ascione A, Nespoli L.                      | Eur J Pediatr. 1980 Mar;133(2):101-6. doi: 10.1007/BF00441577.                    | 1980 |
| 1 | RC18-26 case 1 | 16 y    | M |         | 46,XY,r(18)                    | 6549034     | Predisposition to autoimmune thyroiditis in ring chromosome 18 syndrome                                                            | Fukushima Y, Fukuda T, Kuroki Y, Niikawa N, Matsuura N, Yamada Y.       | Jinrui Idengaku Zasshi. 1984 Jun;29(2):127-32. doi: 10.1007/BF00441577.           | 1984 |
| 1 | RC18-26 case 2 | 1 y     | F |         | 46,XX,r(18)                    | 6549034     |                                                                                                                                    |                                                                         |                                                                                   |      |
| 1 | RC18-26 case 3 | 12 y    | M |         | 46,XY,r(18)/46,XY              | 6549034     |                                                                                                                                    |                                                                         |                                                                                   |      |
| 1 | RC18-26 case 4 | 1 y     | F |         | 46,XX,r(18)                    | 6549034     |                                                                                                                                    |                                                                         |                                                                                   |      |
| 1 | RC18-26 case 5 | 6 y     | M |         | 46,XY,r(18)/46,XY              | 6549034     |                                                                                                                                    |                                                                         |                                                                                   |      |
| 1 | RC18-27        |         |   |         |                                | 4034214     | [Mechanism of a genetically conditioned failure to thrive shown in a patient with ring chromosome 18]                              | Heinz-Erian P, Sigmund J, Frisch H, Kazda S, Bindra A, Rhomberg K.      | Pediatr Padol. 1985;20(3):231-41.                                                 | 1985 |
| 1 | RC18-28        |         |   |         |                                | 3760834     | [Transmission of an 18 ring chromosome in two generations in subjects of normal phenotype]                                         | Faugeras C, Barthe D.                                                   | J Genet Hum. 1986 Aug;34(3-4):313-20.                                             | 1986 |

|   |                |             |   |                |              |                                                           |          |                                                                                                                                                                                |                                                                                                                                                                                                                  |                                                                                                                       |      |
|---|----------------|-------------|---|----------------|--------------|-----------------------------------------------------------|----------|--------------------------------------------------------------------------------------------------------------------------------------------------------------------------------|------------------------------------------------------------------------------------------------------------------------------------------------------------------------------------------------------------------|-----------------------------------------------------------------------------------------------------------------------|------|
| 1 | RC18-29        | 6 m         | M | mat            | > 23 y (mat) | 46,XY,r(18)mat                                            | 3706404  | Ring chromosome 18 in a mother and son                                                                                                                                         | Donlan MA, Dolan CR.                                                                                                                                                                                             | Am J Med Genet. 1986 May;24(1):171-4. doi: 10.1002/ajmg.1320240121.                                                   | 1986 |
| 1 | RC18-30        |             |   |                |              |                                                           | 3601789  | [A case of a girl with a ring chromosome 18 in the karyotype]                                                                                                                  | Midro AT, Czerwińska-Ciechan K, Wiśniewski L, Sawicka A,                                                                                                                                                         | Pol Tyg Lek. 1987 Mar 2;42(9):260-3.                                                                                  | 1987 |
| 1 | RC18-31        | 4 y         | M |                |              | 46,XY,r(18)                                               | 3565953  | [Ring chromosome 18 46,XY,r(18)]                                                                                                                                               | Benito E, Serrano A, Moreno F, Espinosa J, Dávila MJ, Cardesa JJ, Galán Taalman RD, et al.                                                                                                                       | An Esp Pediatr. 1987 Feb;26(2):121-3.                                                                                 | 1987 |
| 1 | RC18-[1]       | 4 y         | F |                |              | 46,XX,r(18)/46,XX,add(18p)                                | 3652494  | Chromosome studies in IgA-deficient patients                                                                                                                                   |                                                                                                                                                                                                                  | Clin Genet. 1987; 32(2):81-7                                                                                          | 1987 |
| 1 | RC18-32        | 7 m         | F |                |              | 46,XX,r(18)                                               | 3367915  | [Van der Woude syndrome in combination with ring chromosome 18]                                                                                                                | Kalker U, Gabriel M, Jacobi G.                                                                                                                                                                                   | Monatsschr Kinderheilkd. 1988 Feb;136(2):95-8.                                                                        | 1988 |
| 1 | RC18-33        | 6 m         | F | de novo        |              | 46,XX,r(18)(p11.3q23)                                     | 3242534  | Ring 18 chromosome with mental retardation, hemidysmorphism, and mitochondrial encephalomyopathy                                                                               | Amit R, Gutman A, Udassin R, Barash V, Kohn G.                                                                                                                                                                   | Pediatr Neurol. 1988 Sep-Oct;4(5):301-4. doi: 10.1016/0887-8994(88)90070-7.                                           | 1988 |
| 1 | RC18-34        | 3.5 y       | M | de novo        |              | 46,XY,r(18)                                               | 3178273  | Growth hormone, suspected gonadotrophin deficiency, and ring 18 chromosome                                                                                                     | Abusrewil SS, McDermott A, Savage DC.                                                                                                                                                                            | Arch Dis Child. 1988 Sep;63(9):1090-1. doi: 10.1136/adc.63.9.1090.                                                    | 1988 |
| 1 | RC18-35        |             |   |                |              |                                                           | 1462429  | [Ring chromosome 18]                                                                                                                                                           | Andersen UM.                                                                                                                                                                                                     | Ugeskr Laeger. 1992 Nov 9;154(46):3250-1.                                                                             | 1992 |
| 1 | RC18-36        | pn, 15 gwks | F | de novo        | top          | 46,XX,r(18)(p11q12)/45,XX,-18                             | 1494547  | Prenatal diagnosis of monosomy 18 and ring chromosome 18 mosaicism                                                                                                             | Eiben B, Unger M, Stoltenberg G, Rutt G, Goebel R, Meyer A, Gamerainger U,                                                                                                                                       | Prenat Diagn. 1992 Nov;12(11):945-50. doi: 10.1002/pd.1970121114.                                                     | 1992 |
| 1 | RC18-37 pt1    | 2 y         | M |                |              | 46,XY,r(18)[0.50]/46,XY[0.50]                             | 1516230  | Autism and ring chromosome 18 mosaicism                                                                                                                                        | Fryns JP, Kleczkowska A.                                                                                                                                                                                         | Clin Genet. 1992 Jul;42(1):55. doi: 10.1111/j.1399-0004.1992.tb03139.x.                                               | 1992 |
| 1 | RC18-37 pt2    | 37 y        | F |                | > 37 y       | 46,XX[0.75]/46,XX,r(18)[0.25]                             | 1516230  |                                                                                                                                                                                |                                                                                                                                                                                                                  |                                                                                                                       |      |
| 1 | RC18-38        | nb          | M | mat            | > 20 y (mat) | 46,XY,r(18)mat                                            | 1524410  | Transmission of ring chromosome 18 46,XX/46,XX,r(18) mosaicism in a mother and ring chromosome 18 syndrome in her son                                                          | Fryns JP, Kleczkowska A, Smeets E, Van Den Berghe H.                                                                                                                                                             | Ann Genet. 1992;35(2):121-3.                                                                                          | 1992 |
| 1 | RC18-39        | nb          | F | mat            |              | 46,XX,r(18)                                               | 8301656  | Transmission of a ring chromosome 18 from a mother with 46,XX/47,XX,+r(18) mosaicism to her daughter, resulting in a 46,XX,r(18) karyotype                                     | Jenderny J, Caliebe A, Beyer C, Grote W.                                                                                                                                                                         | J Med Genet. 1993 Nov;30(11):964-5. doi: 10.1136/jmg.30.11.964.                                                       | 1993 |
| 0 | RC18-39 mat    | 28 y        | F |                | > 28 y       | 46,XX[98]/47,XX,r(18)[2]                                  | 8301656  |                                                                                                                                                                                |                                                                                                                                                                                                                  |                                                                                                                       |      |
| 1 | RC18-40 pt 5   | 17 y        | M |                |              | 46,XY,r(18)                                               | 7839807  | Epileptic seizures, arthrogyriposis, and migrational brain disorders: a syndrome?                                                                                              | Brodtkorb E, Torbergsten T, Nakken KO, Andersen K, Gimse R, Sjaastad O.                                                                                                                                          | Acta Neurol Scand. 1994 Oct;90(4):232-40. doi: 10.1111/j.1600-0404.1994.tb02713.x.                                    | 1994 |
| 1 | RC18-41        | 10 m        | M |                |              | 46,XY,r(18)                                               | 8157016  | Hypothalamic growth hormone deficiency in a patient with ring chromosome 18                                                                                                    | Meloni A, Boccone L, Angius L, Loche S, Falchi AM, Cao A.                                                                                                                                                        | Eur J Pediatr. 1994 Feb;153(2):110-2. doi: 10.1007/BF01959220.                                                        | 1994 |
| 1 | RC18-42        | 1 m         | M | mat nl, pat nd |              | 46,XY,r(18)                                               | 8157419  | Nasal pyriform aperture stenosis and the holoprosencephaly spectrum                                                                                                            | Tavin E, Stecker E, Marion R.                                                                                                                                                                                    | Int J Pediatr Otorhinolaryngol. 1994 Jan;28(2-3):199-204. doi: 10.1016/j.ijot.1994.01.004.                            | 1994 |
| 1 | RC18-43        | pn, 16 gwks | F | de novo        | top          | 46,XX,r(18)/45,XX,-18/47,XX,r(18),+mar                    | 8958334  | Ring chromosome 18 in a fetus with only facial anomalies                                                                                                                       | Los FJ, van den Berg C, Braat PG, Cha'ban FK, Kros JM, Van Opstal D.                                                                                                                                             | Am J Med Genet. 1996 Dec 11;66(2):216-20. doi: 10.1002/(SICI)1096-0004(199612)66:2<216::AID-AMJ6602160216>3.0.CO;2-1. | 1996 |
| 1 | RC18-44        | 5 y         | F | de novo        |              | 46,XX,r(18)(p11q23)                                       | 8942020  | Growth hormone neurosecretory dysfunction associated with ring chromosome 18                                                                                                   | Aritaki S, Takagi A, Someya H, Jun L.                                                                                                                                                                            | Acta Paediatr Jpn. 1996 Oct;38(5):544-8. doi: 10.1111/j.1440-2032.1996.tb01952.x.                                     | 1996 |
| 1 | RC18-45        | 3 y         | M | de novo        |              | 46,XY,r(18)(p11.2q21.33)                                  | 9453033  | Abnormal myelination in a patient with ring chromosome 18                                                                                                                      | Nakayama J, Hamano K, Shimakura Y, Iwasaki N, Nakahara C, Imoto N, Kobayashi K, Arinami T, Hamaguchi H.                                                                                                          | Neuropediatrics. 1997 Dec;28(6):335-7. doi: 10.1055/s-2007-973727.                                                    | 1997 |
| 1 | RC18-46        | nb          | F | de novo        | d. shortly   | 46,XX,r(18)(p11q12)                                       | 9354845  | Anencephaly with holoprosencephalic facies due to ring chromosome 18                                                                                                           | Bird LM, Pretorius DH, Mendoza AE, Jones MC.                                                                                                                                                                     | Clin Dysmorphol. 1997 Oct;6(4):351-8. doi: 10.1097/00019605-199710000-00009.                                          | 1997 |
| 1 | RC18-47        | pn          | F | de novo        | top          | 46,XX,r(18)[27]/45,XX,-18[13]                             | 9813427  | Prenatal diagnosis and fetopathological findings in a fetus with ring chromosome 18                                                                                            | Thies U, Bartels I, von Beust G, Bink K, Hansmann I, Rehder H, Suren A, Zoll B.                                                                                                                                  | Fetal Diagn Ther. 1998 Sep-Oct;13(5):315-20. doi: 10.1159/000005315.                                                  | 1998 |
| 1 | RC18-48        | nb          | F | de novo        |              | 46,XX,r(18)(p11.2q23)[89]/45,XX,-18[5]/46,XX,dic r(18)[6] | 9568951  | Agammaglobulinaemia in a girl with a mosaic of ring 18 chromosome                                                                                                              | Litzman J, Brysová V, Gailllyová R, Thon V, Pijácková A, Michalová K, Zemanová D, Dacou-Voutetakis C, Sertedaki A, Maniatis-Christidis M, Sarri C, Karadima G, Petersen MB, Xaidara A, Kanariou M, Nicolaidou P. | J Paediatr Child Health. 1998 Feb;34(1):92-4. doi: 10.1046/j.1440-2032.1998.34.1.92.x.                                | 1998 |
| 1 | RC18-49        | 4.25 y      | M | de novo        |              | 46,XY,r(18)                                               | 10051018 | Insulin dependent diabetes mellitus (IDDM) and autoimmune thyroiditis in a boy with a ring chromosome 18: additional evidence of autoimmunity or IDDM gene(s) on chromosome 18 |                                                                                                                                                                                                                  | J Med Genet. 1999 Feb;36(2):156-8.                                                                                    | 1999 |
| 1 | RC18-50        | adult       | F |                | > 25 y       | 46,XX,r(18)(p11.3q23)[32]/45,XX,-18[4]                    | 11754054 | First familial case of ring chromosome 18 and monosomy 18 mosaicism                                                                                                            | Yardin C, Esclaire F, Terro F, Baclet MC, Barthe D, Laroche C.                                                                                                                                                   | Am J Med Genet. 2001 Dec 1;104(3):257-9.                                                                              | 2001 |
| 1 | RC18-51 case 1 | 5 m         | F |                |              | 46,XX,r(18)                                               | 11424138 | Clinical and molecular-cytogenetic studies in seven patients with ring chromosome 18                                                                                           | Stankiewicz P, Brozek I, Hélias-Rodziewicz Z, Wierzbą J, Pilch J, Bocian E, Balcerska A, Wozniak A, Kardaś I,                                                                                                    | Am J Med Genet. 2001 Jul 1;101(3):226-39. doi: 10.1002/1096-8628(20010701)101:3<226::aid-                             | 2001 |
| 1 | RC18-51 case 2 | 3 m         | F |                |              | 46,XX,r(18)(p11.3q21.3)                                   | 11424138 |                                                                                                                                                                                |                                                                                                                                                                                                                  |                                                                                                                       |      |

|   |                       |             |   |         |                                                                                          |          |              |                                                                                                                                                                                                                                    |                                                                                                                                                                                                                                                                            |
|---|-----------------------|-------------|---|---------|------------------------------------------------------------------------------------------|----------|--------------|------------------------------------------------------------------------------------------------------------------------------------------------------------------------------------------------------------------------------------|----------------------------------------------------------------------------------------------------------------------------------------------------------------------------------------------------------------------------------------------------------------------------|
| 1 | RC18-51 case 3        | 10 y        | M |         | 46,XY,r(18)(p11.32q21.3)                                                                 | 11424138 |              |                                                                                                                                                                                                                                    |                                                                                                                                                                                                                                                                            |
| 1 | RC18-51 case 4        | 2 y         | M |         | 46,XY,r(18)(p11.1q22.3)                                                                  | 11424138 |              |                                                                                                                                                                                                                                    |                                                                                                                                                                                                                                                                            |
| 1 | RC18-51 case 5        | 3 m         | F |         | 46,XX,r(18)(p11.1q22.3)                                                                  | 11424138 |              |                                                                                                                                                                                                                                    |                                                                                                                                                                                                                                                                            |
| 0 | RC18-51 case 6        | nb          | F |         | 46,XX,add(18)(p11.2)[11]/47,XX,add(18),+r[5 ]                                            | 11424138 |              |                                                                                                                                                                                                                                    |                                                                                                                                                                                                                                                                            |
| 0 | RC18-51 case 7        | 10 y        | F |         | 46,XX,add(18)(p11.32)[60]/47,XX,add(18),+r[ ]                                            | 11424138 |              |                                                                                                                                                                                                                                    |                                                                                                                                                                                                                                                                            |
| 1 | RC18-52               | pn, 20 gwks |   |         | AF: 46,XY,r(18)(p11q23)[103]/45,XY,-18[13] UCB: 46,XX,r(18)[57]/45,XY,-18[12] CVS: 46,XY | 11438954 | top, 23 gwks | Complete karyotype discrepancy between placental and fetal cells in a case of ring chromosome 18                                                                                                                                   | Fischer W, Dermitzel A, Osmer R, Pruggmayer M. Prenat Diagn. 2001 Jun;21(6):481-3. doi: 10.1002/pd.99.                                                                                                                                                                     |
| 1 | RC18-53               | nb          | F |         | 46,XX,r(18)(p11.3q23)[88]/47,XX,r(18)(p11.3q23),+r(18)(p11.22q12.2)[112]                 | 12400074 |              | Meiotic origin of two ring chromosomes 18 in a girl with developmental delay                                                                                                                                                       | Baumer A, Giovannucci Uzielli ML, Guarducci S, Lapi E, Röthlisberger B, Miller K, Pabst B, Ritter H, Nürnberg P, Siebert R, Schmidtke J, Arslan-Kirchner                                                                                                                   |
| 1 | RC18-54               | nb          | F | de novo | 47,XX,r(18),+mar[80]/46,XX,mar[10]/46,XX,r(12574939)                                     |          |              | Chromosome 18 replaced by two ring chromosomes of chromosome 18 origin                                                                                                                                                             | Thomas JV, Mezzasalma DF, Teixeira AM, Campos LN, Luescher JL, Beserra Sripandikulchai R, Suphakunpinyo C, Jetsrisuparb C, Luengwatanawanich S.                                                                                                                            |
| 1 | RC18-55               | 1 y         | F |         | 46,XX,r(16)                                                                              | 17160222 |              | [Growth hormone deficiency, hypothyroidism and ring chromosome 18: case report]                                                                                                                                                    | Arq Bras Endocrinol Metabol. 2006 Oct;50(5):951-6. doi: 10.1007/s00439-002-0885-1.                                                                                                                                                                                         |
| 1 | RC18-56               |             | F |         | 46,XX,r(18)                                                                              | 16850691 |              | Thai girl with ring chromosome 18 (46XX, r18)                                                                                                                                                                                      | J Med Assoc Thai. 2006 Jun;89(6):878-81.                                                                                                                                                                                                                                   |
| 1 | RC18-57 case A        | pn, 14 gwks | M |         | 46,XY,r(18)[36]/45,XY,-18[7]                                                             | 17595336 | top, 15 gwks | Three unusual but cytogenetically similar cases with up to five different cell lines involving structural and numerical abnormalities of chromosome 18                                                                             | Carreira IM, Mascarenhas A, Matoso E, Couceiro AB, Ramos L, Dufke A, Mazauric M, Stressig R, Kosyakova N, Melo JB, Liehr T. J Histochem Cytochem. 2007 Nov;55(11):1123-8. doi: 10.1369/jhc.7A7244.2007. Epub 2007 Jun 26.                                                  |
| 1 | RC18-57 case B        | pn          | M |         | 46,XY,t(18)[0.90]/45,XY,-18[0.10]                                                        | 17595336 | top, 34 gwks |                                                                                                                                                                                                                                    |                                                                                                                                                                                                                                                                            |
| 1 | RC18-57 M2 twin C1/C2 | 6 m         | F |         | 46,XX,r(18)(p11.32q22.3)                                                                 | 17595336 |              |                                                                                                                                                                                                                                    |                                                                                                                                                                                                                                                                            |
| 1 | RC18-58               | 1.6 y       | M |         | 46,XY,r(18)                                                                              | 18935916 |              | Clinical course of a 20-month-old child diagnosed prenatally with mosaic ring chromosome 18 and monosomy 18                                                                                                                        | Mello AL, Crotwell PL, Flanagan JD, Woltanski AR, Keppen LD, Van Eerden P, Boyle JG, Stein Q.                                                                                                                                                                              |
| 1 | RC18-59               | 6.5 y       | F | de novo | 46,XX,r(18)(p11.3q23)[0.86]/45,XX,-18[0.07]/46,XX,dic r(18)[0.07]                        | 17668239 |              | An unexpected finding in a child with neurological problems: mosaic ring chromosome 18                                                                                                                                             | Koç A, Kan D, Karaer K, Ergün MA, Karaoğuz MY, Gücüyener K, Hinreiner                                                                                                                                                                                                      |
| 1 | RC18-60               | pn, 16 gwks | M |         | AF: 46,XY,r(18)[27]/45,XY,-18[5]/46,XY[5]                                                | 21056319 | cp           | Mosaic ring chromosome 18, ring chromosome 18 duplication/deletion and disomy 18: perinatal findings and molecular cytogenetic characterization by fluorescence in situ hybridization and array comparative genomic                | Chen CP, Kuo YT, Lin SP, Su YN, Chen YJ, Hsueh RY, Lin YH, Wu PC, Lee CC, Chen YT, Wang W. Eur J Pediatr. 2008 Jun;167(6):655-9. doi: 10.1007/s00431-007-0568-y.                                                                                                           |
| 1 | RC18-61               | 9 m         | F |         | 46,XX,r(18)(p11.2q23)[98]/46,XX,dic r(18)[2]                                             | 19860520 | > 25 y       | A case of ring chromosome 18 syndrome treated with a combined orthodontic-prosthetic                                                                                                                                               | Ono T, Okuma M, Hamada T, Motohashi N, Moriyama K.                                                                                                                                                                                                                         |
| 1 | RC18-62               | 22 y        | F |         | 46,XX,r(18)(p11.3q23)[14]/46,XX[36]                                                      | 22090726 | > 22 y       | Prenatal diagnosis in a mentally retarded woman with mosaic ring chromosome 18                                                                                                                                                     | Bagherizadeh E, Behjati F, Saberi SH, Shafeghati Y. Indian J Hum Genet. 2011 May;17(2):111-3. doi: 10.4103/0971-6866.86201.                                                                                                                                                |
| 1 | RC18-63               | 9 y         | F | de novo | 46,XX,r(18)(p11.3q23)[92]/45,XX,-18[7]/46,XX[1]                                          | 21333764 |              | De novo mosaic ring chromosome 18 in a child with mental retardation, epilepsy and immunological problems                                                                                                                          | Lo-Castro A, El-Malhany N, Galasso C, Verrotti A, Nardone AM, Postorivo D, Palmieri C, Curatolo P. Eur J Med Genet. 2011 May-Jun;54(3):329-32. doi: 10.1016/j.ejmg.2011.02.004. Epub 2011 Feb 17.                                                                          |
| 1 | RC18-64               | 3.5 y       | F |         | 46,XX,r(18)(p11.3q23)                                                                    | 22145491 | > 20 y       | Autoimmune polyendocrinopathy associated with ring chromosome 18                                                                                                                                                                   | Jain N, Reitnauer PJ, Rao KW, Aylsworth AS, Calikoglu AS. J Pediatr Endocrinol Metab. 2011;24(9-10):847-50. doi: 10.1515/jpem.2011.320.                                                                                                                                    |
| 1 | RC18-65               | 9 y         | M |         | 46,XY,r(18)[0.35]/46,XY[0.65]                                                            | 21848009 |              | Ring chromosome 18 in a child with febrile                                                                                                                                                                                         | Celep F, Sonmez FM, Kul S, Ucar F, Genet Couns. 2011;22(2):165-71.                                                                                                                                                                                                         |
| 0 | RC18-66               |             | M |         | 46,XY,r(18)(p11.3q23)[43]/47,XX,r(18),+ma r[7]                                           | 21484996 |              | Familial ring (18) mosaicism in a 23-year-old young adult with 46,XY,r(18) (:p11→q21:)/46,XY karyotype, intellectual disability, motor retardation and single maxillary incisor and in his phenotypically normal mother, karyotype | Balci S, Tümer C, Karaca C, Bartsch O Am J Med Genet A. 2011 May;155A(5):1129-35. doi: 10.1002/ajmg.a.33868. Epub 2011 Apr 11. PMID: 21484996.                                                                                                                             |
| 1 | RC18-67               | 4 m         | M |         | 46,XY,r(18)(p11.2q23)                                                                    | 22947348 |              | Hypothyroidism and levothyroxine-responsive liver dysfunction in a patient with ring chromosome 18 syndrome                                                                                                                        | Ohkubo K, Ihara K, Ohga S, Ishimura M, Hara T. Thyroid. 2012 Oct;22(10):1080-3. doi: 10.1089/thy.2011.0521. Epub 2012 Sep 4.                                                                                                                                               |
| 1 | RC18-68               | nb          | F |         | 46,XX,r(18)[5]/46,XX[105] CMA[0.26]                                                      | 22887345 |              | Tissue-limited ring chromosome 18 mosaicism as a cause of Pitt-Hopkins syndrome                                                                                                                                                    | Takenouchi T, Yagihashi T, Tsuchiya H, Torii C, Hayashi K, Kosaki R, Saitoh S, Takahashi T, Kosaki K. Am J Med Genet A. 2012 Oct;158A(10):2621-3. doi: 10.1002/ajmg.a.35230. Epub 2012 Aug 10.                                                                             |
| 1 | RC18-69               | 2 m         | F |         | 46,XX,r(18)                                                                              | 22290857 |              | Abnormal myelination in ring chromosome 18 syndrome                                                                                                                                                                                | Benini R, Saint-Martin C, Shevell MI, Bernard G. J Child Neurol. 2012 Aug;27(8):1042-2012 7. doi: 10.1177/0883073811430268. Epub 2012 Jan 30.                                                                                                                              |
| 1 | RC18-70               | 6 y         | M |         | 46,XY,r(18)(p11.2q21.33)                                                                 | 21669507 | d. 6 y       | Abnormal brain MRI signal in 18q-syndrome not due to dysmyelination                                                                                                                                                                | Tanaka R, Iwasaki N, Hayashi M, Nakayama J, Ohto T, Takahashi M, Numano T, Homma K, Hamano K, Caba L, Rusu C, Plăiașu 5th, Gug G, Grămescu M, Bujoran C, Ochiană D, Volosciuc M, Popescu R, Braha E. Brain Dev. 2012 Mar;34(3):234-7. doi: 10.1016/j.braindev.2011.05.008. |
| 1 | RC18-71               | 13.5 y      | F | de novo | 46,XX,r(18)(p11.32q23)[43]/47,XX,r(18),+ma r[7]                                          | 24052730 |              | Ring autosomes: some unexpected findings                                                                                                                                                                                           | Balkan J Med Genet. 2012 Dec;15(2):35-46. doi: 10.2478/bjmg-2013-0005.                                                                                                                                                                                                     |

|   |                |             |   |         |        |                                                |          |                                                                                                                                                   |                                                                                                                                                                                                    |                                                                                                                   |      |
|---|----------------|-------------|---|---------|--------|------------------------------------------------|----------|---------------------------------------------------------------------------------------------------------------------------------------------------|----------------------------------------------------------------------------------------------------------------------------------------------------------------------------------------------------|-------------------------------------------------------------------------------------------------------------------|------|
| 1 | RC18-72        | 2 y         | F | de novo |        | 46,XX,r(18)(p11.32q21.3)                       | 24052730 | Ring autosomes: some unexpected findings                                                                                                          |                                                                                                                                                                                                    |                                                                                                                   |      |
| 1 | RC18-73        | 2 m         | M | de novo |        | 46,XY,r(18)(p11.3q23)                          | 24052730 | Ring autosomes: some unexpected findings                                                                                                          |                                                                                                                                                                                                    |                                                                                                                   |      |
| 1 | RC18-74 pt 1   | 10 y        | M |         |        | 46,XY,r(18)                                    | 23876976 | Single-nucleotide polymorphism array-based characterization of ring chromosome 18                                                                 | Spreiz A, Guilherme RS, Castellan C, Green A, Rittinger O, Weliek B, Utermann B, Erdel M, Fauth C, Haberlandt E, Kim CA, Kulikowski LD, Meloni VA, Utermann G, Zschocke J, Melaragno MI, Kutzot D. | J Pediatr. 2013 Oct;163(4):1174-8.e3. doi: 10.1016/j.jpeds.2013.06.005. Epub 2013 Jul 19.                         | 2013 |
| 1 | RC18-74 pt 2   | 22 y        | F |         | > 22 y | 46,XX,r(18)                                    | 23876976 |                                                                                                                                                   |                                                                                                                                                                                                    |                                                                                                                   |      |
| 1 | RC18-74 pt 3   | 8 y         | F |         |        | 46,XX,r(18)                                    | 23876976 |                                                                                                                                                   |                                                                                                                                                                                                    |                                                                                                                   |      |
| 1 | RC18-74 pt 4   | 14          | F |         |        | 46,XX,r(18)                                    | 23876976 |                                                                                                                                                   |                                                                                                                                                                                                    |                                                                                                                   |      |
| 1 | RC18-74 pt 5   | 1.5 y       | F |         |        | 46,XX,r(18)                                    | 23876976 |                                                                                                                                                   |                                                                                                                                                                                                    |                                                                                                                   |      |
| 1 | RC18-74 pt 6   | 39 y        | F |         | > 39 y | 46,XX,r(18)                                    | 23876976 |                                                                                                                                                   |                                                                                                                                                                                                    |                                                                                                                   |      |
| 1 | RC18-74 pt 7   | 11 y        | M |         |        | 46,XY,r(18)                                    | 23876976 |                                                                                                                                                   |                                                                                                                                                                                                    |                                                                                                                   |      |
| 1 | RC18-74 pt 8   | 7 y         | F |         |        | 46,XX,r(18)                                    | 23876976 |                                                                                                                                                   |                                                                                                                                                                                                    |                                                                                                                   |      |
| 1 | RC18-74 pt 9   | 13.5 y      | F |         |        | 46,XX,r(18)                                    | 23876976 |                                                                                                                                                   |                                                                                                                                                                                                    |                                                                                                                   |      |
| 1 | RC18-75        | 2.5 y       | M | de novo |        | 46,XY,r(18)(p11.32q21.32)                      | 25635256 | Ring chromosome 18: a case report                                                                                                                 | Heydari S, Hassanzadeh F, Hassanzadeh Nazarabadi M.                                                                                                                                                | Int J Mol Cell Med. 2014 Fall;3(4):287-9.                                                                         | 2014 |
| 1 | RC18-76        | 14 y        | M |         |        | 46,XY,r(18)(p11q23)                            | 24909220 | A case of ophiasis type of alopecia areata in a patient with ring chromosome 18 syndrome                                                          | Kagimoto Y, Mizuashi M, Kikuchi K, Aiba S.                                                                                                                                                         | J Dermatol. 2014 Jun;41(6):559-60. doi: 10.1111/1346-8138.12512.                                                  | 2014 |
| 1 | RC18-77        | 23 y        | M | mat     | > 23 y | 46,XY,r(18)(p11q21)[75]/46,XY[25]              | 24677800 | Formation of a familial ring chromosome 18 investigated by SNP-array analysis                                                                     | Balci S, Zschocke J, Kutzot D, Ergün MA, Spreiz A.                                                                                                                                                 | Am J Med Genet A. 2014 Jul;164A(7):1854-6. doi: 10.1002/ajmg.a.36496. Epub 2014 Mar 26.                           | 2014 |
| 0 | RC18-77 mat    |             |   |         |        | 47,XX,r(18)(p11q21)[10]/46,XX[90]              | 24677800 |                                                                                                                                                   |                                                                                                                                                                                                    |                                                                                                                   |      |
| 1 | RC18-78        | 3 y         | M | de novo |        | 46,XY,r(18)(p11.2q23)[97]/45,XY,-18[3]         | 25668898 | Selective IgM deficiency in a boy with ring chromosome 18                                                                                         | Celmeli F, Turkkahraman D, Cetin Z, Mihci E, Yegin O.                                                                                                                                              | J Invest Allergol Clin Immunol. 2014;24(6):442-4.                                                                 | 2014 |
|   | RC18-79        | 5.5 y       | F | de novo |        | 46,XX,r(18)                                    | 25229966 | [Growth hormone deficiency in a girl with ring 18 chromosome syndrome]                                                                            | Zhang YN, Reheman P, Du HW, Wang LJ.                                                                                                                                                               | Zhongguo Dang Dai Er Ke Za Zhi. 2014 Sep;16(9):947-8.                                                             | 2014 |
| 1 | RC18-80 case 1 | pn, 18 gwks | F |         | top    | 46,XX,r(18)[27]/45,XX,-18[5]                   | 26224010 | Molecular characterization of ring chromosome 18 by low-coverage next generation sequencing                                                       | Ji X, Liang D, Sun R, Liu C, Ma D, Wang Y, Hu P, Xu Z.                                                                                                                                             | BMC Med Genet. 2015 Jul 30;16:57. doi: 10.1186/s12881-015-0206-x.                                                 | 2015 |
| 1 | RC18-80 case 2 | 8 m         | F | de novo |        | 46,XX,r(18)                                    | 26224010 |                                                                                                                                                   |                                                                                                                                                                                                    |                                                                                                                   |      |
| 0 | RC18-81        |             |   |         |        |                                                | 26468787 | Sphincterplasty for Velopharyngeal Insufficiency in the Child Without a Cleft-Palate: Etiologies and Speech Outcomes                              | Golinko MS, Mason K, Nett K, Riski JE, Williams JK.                                                                                                                                                | J Craniofac Surg. 2015 Oct;26(7):2067-71. doi: 10.1097/SCS.0000000000001967.                                      | 2015 |
| 0 | RC18-82        |             |   |         |        |                                                | 25339348 | Ring 18 molecular assessment and clinical consequences                                                                                            | Carter E, Heard P, Hasi M, Soileau B, Sebold C, Hale DE, Cody JD.                                                                                                                                  | Am J Med Genet A. 2015 Jan;167A(1):54-63. doi: 10.1002/ajmg.a.36822. Epub 2014 Oct 22.                            | 2015 |
| 1 | RC18-83        | nb          | F |         |        | 46,XX,r(18)(p11q22)                            | 27577543 | Patchy white matter hyperintensity in ring chromosome 18 syndrome                                                                                 | Anzai M, Arai-Ichinoi N, Takezawa Y, Endo W, Inui T, Sato R, Kikuchi A, Uematsu M, Kure S, Haginoya K.                                                                                             | Pediatr Int. 2016 Sep;58(9):919-22. doi: 10.1111/ped.13043. Epub 2016 Aug 31.                                     | 2016 |
| 1 | RC18-84        | 2 y         | F | de novo |        | 46,XX,r(18)                                    | 27448395 | Breakpoints and deleted genes identification of ring chromosome 18 in a Chinese girl by whole-genome low-coverage sequencing: a case report study | Yao H, Yang C, Huang X, Yang L, Zhao W, Yin D, Qin Y, Mu F, Liu L, Tian P, Liu Z, Yang Y.                                                                                                          | BMC Med Genet. 2016 Jul 22;17(1):49. doi: 10.1186/s12881-016-0307-1.                                              | 2016 |
| 1 | RC18-85        | nb          | M |         |        | 46,XY,r(18)                                    | 26893613 | Ring chromosome 18 in combination with 18q12.1 (DTNA) interstitial microdeletion in a patient with multiple congenital defects                    | Zlotina A, Nikulina T, Yany N, Moiseeva O, Pervunina T, Grekhov E, Kostareva A.                                                                                                                    | Mol Cytogenet. 2016 Feb 18;9:18. doi: 10.1186/s13039-016-0229-9. eCollection 2016.                                | 2016 |
| 1 | RC18-86 case 2 | 9 y         | M |         |        | 46,XY,r(18)                                    | 26947896 | Humoral deficiency in three paediatric patients with genetic diseases                                                                             | Campoverde KC, Gean E, Gibert MP et al.,                                                                                                                                                           | Allergol Immunopathol. 2016;44(3):257-62                                                                          | 2016 |
| 1 | RC18-87        | nb          | F |         | > 32 y | 46,XX,r(18)[14]/46,XX[4]/r-var[2]              | 29560252 | Rheumatoid arthritis in an adult patient with mosaic distal 18q-, 18p- and ring chromosome 18                                                     | Chau A, Ramesh KH, Jagannath AD, Arora S.                                                                                                                                                          | F1000Res. 2017 Nov 2;6:1940. doi: 10.12688/f1000research.11539.2. eCollection 2017.                               | 2017 |
| 1 | RC18-88        |             | M |         |        | 46,XY,r(18)[52]/45,XY-18[3]                    | 31598948 | [Molecular cytogenetic diagnosis of a case with ring chromosome 18 syndrome]                                                                      | Lyu Y, Wang X, Zhang K, Gao M, Ma J, Liu X, Gai Z, Liu Y.                                                                                                                                          | Zhonghua Yi Xue Yi Chuan Xue Za Zhi. 2019 Oct 10;36(10):1010-1014. doi: 10.3760/cma.j.issn.1003-9406.2019.10.015. | 2019 |
| 1 | RC18-89        | 3 y         | F | de novo |        | 46,XX,r(18)(p11.32q22.2)[0.93]/45,XX,-18[0.07] | 31788257 | Central and peripheral dysmyelination in a 3-year-old girl with ring chromosome 18                                                                | Lammert DB, Miedema D, Ochotorena J, Dosa N, Petropoulou K, Lebel RR, Sakonju A.                                                                                                                   | Clin Case Rep. 2019 Sep 27;7(11):2087-2091. doi: 10.1002/ccr3.2426. eCollection 2019 Nov.                         | 2019 |
| 1 | RC18-90        | 7 y         | F | de novo |        | 46,XX,r(18)[30]/46,XX,psu idic(18)(p11.2[25]   | 32972420 | Mosaic chromosome 18 anomaly delineated in a child with dysmorphism using a three-pronged cytogenetic techniques approach: a case report          | Sheth H, Trivedi S, Liehr T, Patel K, Jain D, Sheth J, Sheth F.                                                                                                                                    | BMC Med Genomics. 2020 Sep 24;13(1):141. doi: 10.1186/s12920-020-00796-9.                                         | 2020 |

|   |         |      |   |         |                           |                        |                                                                                                         |                                                                                           |                                                                                                 |                                                                                   |      |
|---|---------|------|---|---------|---------------------------|------------------------|---------------------------------------------------------------------------------------------------------|-------------------------------------------------------------------------------------------|-------------------------------------------------------------------------------------------------|-----------------------------------------------------------------------------------|------|
| 1 | RC18-91 | nb   | F | de novo | 46,XX,r(18)(p11.31q21.31) | 33224015               | A Case of Ring Chromosome 18 with Single Umbilical Artery Detected During Prenatal Period               | Eras N.                                                                                   | Mol Syndromol. 2020 Nov;11(4):217-222. doi: 10.1159/000509646. Epub 2020 Sep 10.                | 2020                                                                              |      |
| 1 | RC18-92 | 4 y  | M |         | 46,XY,r(18)               | 32209754               | Blaschkoid hypermelanosis in a patient with ring 18 chromosome                                          | Varas-Meis E, Delgado-Vicente S, Fernández-Canga P, Rodríguez Prieto MA.                  | Indian J Dermatol Venereol Leprol. 2020 May-Jun;86(3):316-318. doi: 10.4103/ijdlv.IJDLV_282_18. | 2020                                                                              |      |
| 1 | RC18-93 | 11 y | F | mat nl  | 46,XX,r(18)               | 33829328               | Mosaic ring chromosome 18 in a Chinese child with epilepsy: a case report and review of the literature. | Wang J, Xiao L, Wang J, Ding Z, Ni J, Long X.                                             | Neurol Sci. 2021 Dec;42(12):5231-5239                                                           | 2021                                                                              |      |
| 1 | RC18-94 | 20 y | M | > 20 y  | 46,XY,r(18)               | 34606568               | Anesthetic Management of a Patient With Ring 18 Syndrome                                                | Maekawa M, Yasuda M, Sasaki H                                                             | Anesth Prog. 2021 Oct 1;68(3):178-179                                                           | 2021                                                                              |      |
| 1 | RC18-95 | 27 y | F | de novo | > 27 y                    | 46,XX,r(18)(p11.32q22) | 34775554                                                                                                | A case report of Ring chromosome 18 with systemic Lupus Erythematosus and Crohn's disease | Rezaeizadeh T, Delshad E, Mansour Samaei N, Gholipour N                                         | Mol Biol Rep. 2022 Feb;49(2):1085-1088. doi: 10.1007/s11033-021-06933-6, Epub2021 | 2022 |

**110 95**

|   |               |             |   |         |                                                                                               |                                                |                                                                                              |                                                                                                                                                                                    |                                                                                                                                                   |      |
|---|---------------|-------------|---|---------|-----------------------------------------------------------------------------------------------|------------------------------------------------|----------------------------------------------------------------------------------------------|------------------------------------------------------------------------------------------------------------------------------------------------------------------------------------|---------------------------------------------------------------------------------------------------------------------------------------------------|------|
| 1 | RC19-1 Case 1 | 13 y        | F | de novo | 46,XX[0.78]/46,XX,r(19)[0.22]                                                                 | 5038363                                        | Ring formation of chromosomes nos. 19 and 20                                                 | Uchida IA, CC Lin                                                                                                                                                                  | Cytogenetics 1972;11(3):208-15                                                                                                                    | 1972 |
| 1 | RC19-2        | nb          | M | nd      | PB: 46,XY[45]/46,XY,r(19)[5], SF[4/50]/PB[8/50]                                               | 3233786                                        | Mosaicism for ring 19: a case report                                                         | Sybert VP, Bradley CM, Salk D                                                                                                                                                      | Clin Genet 34(6):382-5, 1988                                                                                                                      | 1988 |
| 1 | RC19-3        | pn, 17 gwks | F | de novo | stillborn, 21 gwks                                                                            | 2274494                                        | Ring 19 mosaicism detected during prenatal diagnosis                                         | Gillessen-Kaesbach G, Ngo NT.                                                                                                                                                      | Prenat Diagn. 1990 Oct;10(10):683-7. doi: 10.1002/pd.1970101009.                                                                                  | 1990 |
| 1 | RC19-4 case 1 | adult       | F | > 20 y  | PB: 46,XX,r(19),22p+[93]/45,XX,-19,22p+[7] SF: 46,XX,r(19)[86]/46,XX[7]/45,XX,-19[4]/r-var[3] | 8454286                                        | High-resolution cytogenetic characterization of telomeric associations in ring chromosome 19 | Sawyer JR, Rowe RA, Hased SJ, Cunniff C.                                                                                                                                           | Hum Genet. 1993 Mar;91(1):42-4. doi: 10.1007/BF00230220.                                                                                          | 1993 |
| 1 | RC19-5        | 1.2 y       | F | mat     | 46,XX,r(19)[119/121]/46,XX[1]/45,XX,-19[1] mat 46,XX[96]/46,XX,r(19)[4]                       | 8985487                                        | Familial ring (19) chromosome mosaicism: case report and review                              | Flejtner WL, Finlinson D, Root S, Nguyen W, Brothman AR, Viskochil D.                                                                                                              | Am J Med Genet. 1996 Dec 18;66(3):276-80. doi: 10.1002/(SICI)1096-8620(199612)66:3<276::AID-AJMG1096>3.0.CO;2-7. doi: 10.1016/j.ejmg.2005.04.009. | 1996 |
| 1 | RC19-6 case 1 | 1.5 y       | F | mat     | > 20 y (mat)                                                                                  | 46,XX,r(19), mat 46,XX,r(19)[0.20]/46,XX[0.80] | 16179226                                                                                     | High resolution microarray CGH and MLPA analysis for improved genotype/phenotype evaluation of two childhood genetic disorder cases: ring chromosome 19 and partial duplication 2q | Hermsen MA, Tijssen M, Acero IH, Meijer GA, Ylstra B, Toral JF.                                                                                   | 2005 |

**6 6**

|   |               |       |   |         |              |                                                                         |         |                                                                                                                                                            |                                                                                       |                                                                                      |
|---|---------------|-------|---|---------|--------------|-------------------------------------------------------------------------|---------|------------------------------------------------------------------------------------------------------------------------------------------------------------|---------------------------------------------------------------------------------------|--------------------------------------------------------------------------------------|
| 1 | RC20-[1]      | 10 y  | F | de novo | > 26 y       | 46,XX[0.78]/46,XX,r(20)[0.22]                                           | 5038363 | A ring-20 chromosome                                                                                                                                       | Atkins L, Miller WL, Salam M.                                                         | J Med Genet. 1972 Sep;9(3):377-80. doi: 10.1136/jmg.9.3.377.                         |
| 1 | RC20-1        | 4 m   | M |         |              | 46,XY,r(20)[47]/45,XY,-20[3]                                            | 4627939 |                                                                                                                                                            |                                                                                       |                                                                                      |
| 1 | RC20-2        |       |   |         |              |                                                                         | 305753  | [Ring-20 chromosome: a new syndrome]                                                                                                                       | Jalbert P, Jalbert H, Sele B, Tachker D, Bost M, Meynard R, Pison H.                  | Ann Genet. 1977 Dec;20(4):258-62. doi: 10.1136/jmg.14.4.281.                         |
| 1 | RC20-3        | 5 y   | F |         | > 21 y       | PB/BM: 46,XX,r(20)[0.90]/46,XX[0.09]                                    | 926142  | The r(20) syndrome                                                                                                                                         | Herva R, Saarinen I, Leikkonen L.                                                     | J Med Genet. 1977 Aug;14(4):281-3. doi: 10.1136/jmg.14.4.281.                        |
| 1 | RC20-4        | 1 y   | M | de novo |              | 46,XY,r(20)[21]/46,XY[3]                                                | 475436  | Ring 20 chromosome in a child with seizures, minor anomalies, and retardation                                                                              | Stewart JM, Cavanagh N, Hughes DT.                                                    | Arch Dis Child. 1979 Jun;54(6):477-9. doi: 10.1136/adc.54.6.477.                     |
| 1 | RC20-5        | 8 m   | F | de novo |              | 46,XX,r(20)                                                             | 2418815 | A case of ring 20 chromosome with cardiac and renal anomalies                                                                                              | Burnell RH, Stern LM, Sutherland GR.                                                  | Aust Paediatr J. 1985 Nov;21(4):285-1985 6. doi: 10.1111/j.1440-1754.1985.tb00167.x. |
| 1 | RC20-6        | nb    | M | de novo |              | 46,XY,r(20)(p13q13)                                                     | 3612710 | Ring 20 chromosome phenotype                                                                                                                               | Porfirio B, Valorani MG, Giannotti A, Sabetta G, Dallapiccola B.                      | J Med Genet. 1987 Jun;24(6):375-7. doi: 10.1136/jmg.24.6.375.                        |
| 1 | RC20-7        | 2 y   | M | mat     | > 38 y (mat) | 46,XY,r(20)[PB0.88,SF0.66]/46,XY                                        | 2777254 | Familial ring (20) chromosomal mosaicism                                                                                                                   | Back E, Voiculescu I, Brünger M, Wolff G.                                             | Hum Genet. 1989 Sep;83(2):148-54. doi: 10.1007/BF00286708.                           |
| 0 | RC20-7 sister | 2 y   | F | mat     |              | 46,XX,r(20)[PB0.67,SF0.22]/46,XX; mat: 46,XX,r(20)[PB0.31,SF0.34]/46,XX | 2777254 |                                                                                                                                                            |                                                                                       |                                                                                      |
| 1 | RC20-8        |       |   |         |              |                                                                         | 2757359 | A case of the ring 20 syndrome                                                                                                                             | Thomsen SG, Petersen MB, Andersen EA, ostergaard GZ, Lindenberg S.                    | Ann Genet. 1989;32(2):111-3. doi: 10.1136/jmg.14.4.281.                              |
| 1 | RC20-9        | 8.5 y | M | de novo |              | 46,XY,r(20)(p13q13.3)                                                   | 1605251 | Ring chromosome 20 and possible assignment of the structural gene encoding human carboxypeptidase-L to the distal segment of the long arm of chromosome 20 | Halal F, Chitayat D, Parikh H, Rosenblatt B, Tranchemontagne J, Vekemans M, Potier M. | Am J Med Genet. 1992 Jun 1;43(3):576-9. doi: 10.1002/ajmg.1320430314.                |
| 1 | RC20-10       | 5 m   | M | de novo |              | 46,XY,r(20)                                                             | 8403451 | Ring chromosome 20 with loss of telomeric sequences detected by multicolour PRINS                                                                          | Brandt CA, Kierkegaard O, Hindkjaer J, Jensen PK, Pedersen S, Therkelsen AJ.          | Clin Genet. 1993 Jul;44(1):26-31. doi: 10.1111/j.1399-0004.1993.tb03837.x.           |

|   |                |       |   |         |              |                                                                     |          |                                                                                                                                      |                                                                            |                                                                                         |      |
|---|----------------|-------|---|---------|--------------|---------------------------------------------------------------------|----------|--------------------------------------------------------------------------------------------------------------------------------------|----------------------------------------------------------------------------|-----------------------------------------------------------------------------------------|------|
| 1 | RC20-11        | 7 y   | F | de novo |              | 46,XX/46,XX,r(20)(p13q13)                                           | 8132117  | Ring chromosome 20 mosaicism in a girl with complex partial seizures                                                                 | Holopainen I, Penttinen M, Lakkala T, Aärimaa T.                           | Dev Med Child Neurol. 1994 Jan;36(1):70-3. doi: 10.1111/j.1469-8749.1994.tb11768.x.     | 1994 |
| 1 | RC20-12        | 3.3 y | M | de novo |              | 46,XY/46,XY,r(20)(p13q13.33)                                        | 7635104  | Nonphotosensitive video game-induced partial seizures                                                                                | Takahashi Y, Shigematsu H, Kubota H, Inoue Y, Fujiwara T, Yagi K, Seino M. | Epilepsia. 1995 Aug;36(8):837-41. doi: 10.1111/j.1528-1157.1995.tb01623.x.              | 1995 |
| 1 | RC20-13 pt 1   | 8 y   | F |         |              | 46,XX,r(20)(p13q13.33)[4]/46,XX[16]                                 | 9217679  | Ring chromosome 20 and nonconvulsive status epilepticus. A new epileptic syndrome                                                    | Inoue Y, Fujiwara T, Matsuda K, Kubota H, Tanaka M, Yagi K, Yamamori K,    | Brain. 1997 Jun;120 ( Pt 6):939-53. doi: 10.1093/brain/120.6.939.                       | 1997 |
| 1 | RC20-13 pt 2   | 3.3 y | M |         |              | 46,XY,r(20)(p13q13.33)[16]/46,XY[14]                                | 9217679  |                                                                                                                                      |                                                                            |                                                                                         |      |
| 1 | RC20-13 pt 3   | 14 y  | F |         | > 21 y       | 46,XX,r(20)(p13q13.33)[5]/46,XX[15]                                 | 9217679  |                                                                                                                                      |                                                                            |                                                                                         |      |
| 1 | RC20-13 pt 4   | 7 y   | F |         | > 28 y       | 46,XX,r(20)(p13q13.33)[8]/46,XX[12]                                 | 9217679  |                                                                                                                                      |                                                                            |                                                                                         |      |
| 1 | RC20-13 pt 5   | 7 y   | F |         | > 31 y       | 46,XX,r(20)(p13q13.33)[13]/46,XX[36]                                | 9217679  |                                                                                                                                      |                                                                            |                                                                                         |      |
| 1 | RC20-13 pt 6   | 11 y  | M |         | > 25 y       | 46,XY,r(20)(p13q13.33)[3]/46,XY[27]                                 | 9217679  |                                                                                                                                      |                                                                            |                                                                                         |      |
| 1 | RC20-14        |       |   |         |              |                                                                     | 9935297  | [A new epileptic syndrome: ring chromosome 20--interhemispheric peak delay of spikes]                                                | Kamuro K, Yoshimi S, Morikawa T.                                           | No To Hattatsu. 1998 Sep;30(5):431-2.                                                   | 1998 |
| 1 | RC20-15        | 3 y   | F |         | > 24 y       | 46,XX,r(20)(p13q13.3)[0.87]/46,XX[0.13]                             | 9682935  | A study of ring 20 chromosome karyotype with epilepsy                                                                                | Yamadera H, Kobayashi K, Sugai K, Suda H, Kaneko S.                        | Psychiatry Clin Neurosci. 1998 Feb;52(1):63-8. doi: 10.1111/j.1440-1819.1998.tb00974.x. | 1998 |
| 1 | RC20-15.5 pt 1 | 5 y   | M | mat     | > 44 y (mat) | 46,XY,r(20)[0.83]/46,XX[0.17];<br>mat 46,XX,r(20)[0.12]/46,XX[0.88] | 9738673  | chromosome 20 ring: a chromosomal disorder associate particular electroclinical pattern.                                             | Canevini MP, Sgro V, Zuffardi O, Canger R,                                 | Epilepsia 1998, 39:942-951.                                                             | 1998 |
| 1 | RC20-15.5 pt 3 | 21 y  | M |         | > 21 y       | 46,XY,r(20)[0.13]/46,XY[0.67]                                       | 9738673  |                                                                                                                                      |                                                                            |                                                                                         |      |
| 3 | RC20-16        |       |   |         |              |                                                                     | 10937160 | Non-convulsive status in the ring chromosome 20 syndrome: a video illustration of 3 cases                                            | Petit J, Roubertie A, Inoue Y, Genton P.                                   | Epileptic Disord. 1999 Dec;1(4):237-41.                                                 | 1999 |
| 2 | RC20-17        |       |   |         |              |                                                                     | 10743013 | [Ring chromosome 20: an identifiable epileptic syndrome]                                                                             | Roubertie A, Petit J, Genton P.                                            | Rev Neurol (Paris). 2000 Feb;156(2):149-53.                                             | 2000 |
| 1 | RC20-18 pt1    | 11 y  | F |         |              | 46,XX,r(20)[0.68]                                                   | 11571346 | Ring chromosome 20 epilepsy syndrome in children: electroclinical features                                                           | Augustijn PB, Parra J, Wouters CH, Joosten P, Lindhout D, van Emde Boas    | Neurology. 2001 Sep 25;57(6):1108-11. doi: 10.1212/wnl.57.6.1108.                       | 2001 |
| 1 | RC20-18 pt2    | 3 y   | F |         |              | 46,XX,r(20)[0.12]                                                   | 11571346 |                                                                                                                                      |                                                                            |                                                                                         |      |
| 1 | RC20-18 pt3    | 11 y  | M |         |              | 46,XY,r(20)[0.14]                                                   | 11571346 |                                                                                                                                      |                                                                            |                                                                                         |      |
| 1 | RC20-18 pt4    | 8 y   | F |         |              | 46,XX,r(20)[0.28]                                                   | 11571346 |                                                                                                                                      |                                                                            |                                                                                         |      |
| 1 | RC20-19        |       |   |         |              |                                                                     | 11310277 | [Ring chromosome 20: an epileptic channel disorder?]                                                                                 | Serrano-Castro PJ, Aguilar-Castillo MJ, Olivares-Romero J, Jiménez-Machado | Rev Neurol. 2001 Feb 1-15;32(3):237-41.                                                 | 2001 |
| 1 | RC20-20        | 2 y   | M | de novo |              | 46,XY,r(20)(p13q13.3)                                               | 11879375 | Ring 20 chromosome syndrome with epilepsy and dysmorphic features: a case report                                                     | García DM, Ortiz R, Gómez A, Barriuso E.                                   | Epilepsia. 2001 Dec;42(12):1607-10. doi: 10.1046/j.1528-                                | 2001 |
| 1 | RC20-21        | 3 m   | F |         |              | 46,XX,r(20)                                                         | 12546436 | Intractable epilepsy with ring chromosome 20 syndrome treated with vagal nerve stimulation: case report and review of the literature | Chawla J, Sucholeiki R, Jones C, Silver K.                                 | J Child Neurol. 2002 Oct;17(10):778-80. doi: 10.1177/08830738020170101805.              | 2002 |
| 1 | RC20-22        | 9 y   | M | de novo |              | 46,XY,r(20)(p13q13.3)[0.90]/r-var[0.10]                             | 12244405 | Epilepsy and ring chromosome 20: case report                                                                                         | Gomes Mda M, Lucca I, Bezerra SA, Llerena J Jr, Moreira DM.                | Arq Neuropsiquiatr. 2002 Sep;60(3-4):631-5. doi: 10.1590/s0004-                         | 2002 |
| 0 | RC20-23        |       |   |         |              |                                                                     | 11914429 | Ring chromosome 20 epilepsy syndrome in children: electroclinical features                                                           | Serrano-Castro PJ.                                                         | Neurology. 2002 Mar 26;58(6):987- author reply 987. doi: 10.1212/wnl.58.6.987.          | 2002 |
| 1 | RC20-24        |       |   |         |              |                                                                     | 14593631 | [Ring chromosome 20, hypersensitivity to valproate and hyperammonemic encephalopathy]                                                | Ortiz-Sáenz de Santa María MR, Barriuso-Pérez E, Soto-Alvarez MI,          | Rev Neurol. 2003 Oct 16-31;37(8):733-5.                                                 | 2003 |
| 0 | RC20-25        |       |   |         |              |                                                                     | 15249613 | PET evidence for a role of the basal ganglia in patients with ring chromosome 20 epilepsy                                            | Biraben A, Semah F, Ribeiro MJ, Douaud G, Remy P, Depaulis A.              | Neurology. 2004 Jul 13;63(1):73-7. doi: 10.1212/01.wnl.0000132840.40838.13.             | 2004 |
| 1 | RC20-26        |       |   |         |              |                                                                     | 15131740 | [Ring chromosome 20: a distinctive syndrome identifiable by electroclinical diagnosis]                                               | Gonzalez-Delgado M, Salas J, Hernando I, Calleja S, Hernandez C.           | Neurologia. 2004 May;19(4):215-9.                                                       | 2004 |
| 1 | RC20-27        | 8 y   | M |         |              | 46,XY,r(20)(p13q13.3)[2]/46,XY[28]                                  | 14966172 | Ictal magnetoencephalographic study in a patient with ring 20 syndrome                                                               | Tanaka N, Kamada K, Takeuchi F.                                            | J Neurol Neurosurg Psychiatry. 2004 Mar;75(3):488-90. doi:                              | 2004 |
| 1 | RC20-28        |       |   |         |              |                                                                     | 16164241 | [Continuous midazolam infusion for refractory nonconvulsive status epilepticus in children]                                          | Nobutoki T, Sugai K, Fukumizu M, Hanaoka S, Sasaki M.                      | No To Hattatsu. 2005 Sep;37(5):369-73.                                                  | 2005 |
| 0 | RC20-29        |       |   |         |              |                                                                     | 16097967 | Regarding: 'Mosaicism and seizure onset in ring chromosome 20 syndrome'                                                              | Serrano-Castro PJ, Aguilar Castillo MJ.                                    | Acta Neurol Scand. 2005 Sep;112(3):202; author reply 203.                               | 2005 |
| 1 | RC20-30 pt 1   | 12 y  | F |         | > 25 y       | 46,XX,r(20)(p13q13)[0.20]/46,XX[0.80]                               | 16128150 | Ring chromosome 20 with nonconvulsive status epilepticus: electroclinical correlation of a rare epileptic syndrome                   | Locharernkul C, Ebner A, Promchainant C.                                   | Clin EEG Neurosci. 2005 Jul;36(3):151-60. doi: 10.1177/155005940503600305.              | 2005 |
| 1 | RC20-30 pt 2   | 15 y  | F |         | > 37 y       | 46,XX,r(20)(p13q13)[0.20]/46,XX[0.80]                               | 16128150 |                                                                                                                                      |                                                                            |                                                                                         |      |

|   |                  |       |   |                                 |                                                        |                                         |                                                                                                                                 |                                                                                                                                                                                                        |                                                                                                           |                                                                         |      |
|---|------------------|-------|---|---------------------------------|--------------------------------------------------------|-----------------------------------------|---------------------------------------------------------------------------------------------------------------------------------|--------------------------------------------------------------------------------------------------------------------------------------------------------------------------------------------------------|-----------------------------------------------------------------------------------------------------------|-------------------------------------------------------------------------|------|
| 1 | RC20-31          | 1.5 y | M | de novo                         | 46,XY,r(20)[200]                                       | 15892377                                | Ring chromosome 20 syndrome with intractable epilepsy                                                                           | Alpman A, Serdaroglu G, Cogulu O, Tekgul H, Gokben S, Ozkinay F.                                                                                                                                       | Dev Med Child Neurol. 2005 May;47(5):343-6. doi: 10.1017/s0012162205000642.                               | 2005                                                                    |      |
| 1 | RC20-32          | 17 y  | F | > 36 y                          | 46,XX,r(20)[0.13]/45,XX,-20[0.03]/46,XX[0.84]          | 15691292                                | Mosaicism and phenotype in ring chromosome 20 syndrome                                                                          | Nishiwaki T, Hirano M, Kumazawa M, Ueno S.                                                                                                                                                             | Acta Neurol Scand. 2005 Mar;111(3):205-8. doi: 10.1002/ajmg.a.31332.                                      | 2005                                                                    |      |
| 1 | RC20-33          | 5 y   | F | > 26 y                          | 46,XX/46,XX,r(20)(p13q13.3)                            | 16835934                                | Mosaic ring 20 with no detectable deletion by FISH analysis: Characteristic seizure disorder and literature review              | Zou YS, Van Dyke DL, Thorland EC, Chhabra HS, Michels VV, Keefe JG, Lega MA, Feely MA, Uphoff TS, Jalal de Falco FA, Olivieri P, de Falco A, Concolino D, Battaglia F, Verardi R, Grande G, Stabile M. | Am J Med Genet A. 2006 Aug 1;140(15):1696-706. doi: 10.1002/ajmg.a.31332.                                 | 2006                                                                    |      |
| 1 | RC20-34          | 21 y  | F | > 46 y                          | 46,XX,r(20)[0.50]/46,XX[0.25]/r-var[0.25]              | 16806995                                | Electroclinical evolution in ring chromosome 20 epilepsy syndrome: a case with severe phenotypic features followed for 25 years | Concolino D, Battaglia F, Verardi R, Grande G, Stabile M.                                                                                                                                              | Seizure. 2006 Sep;15(6):449-53. doi: 10.1016/j.seizure.2006.03.004. Epub 2006 Jun 27.                     | 2006                                                                    |      |
| 1 | RC20-35 case 1   | 6 y   | M |                                 | 46,XY,r(20)[0.43]                                      | 16529619                                | Early pattern of epilepsy in the ring chromosome 20 syndrome                                                                    | Ville D, Kaminska A, Bahi-Buisson N, Biraben A, Plouin P, Telvi L, Dulac O,                                                                                                                            | Epilepsia. 2006 Mar;47(3):543-9. doi: 10.1111/j.1528-                                                     | 2006                                                                    |      |
| 1 | RC20-35 case 2   | 5 y   | M | > 24 y                          | 46,XY,r(20)[0.77]                                      | 16529619                                |                                                                                                                                 |                                                                                                                                                                                                        |                                                                                                           |                                                                         |      |
| 1 | RC20-35 case 3   | 12 Y  | F |                                 | 46,XX,r(20)[0.40]                                      | 16529619                                |                                                                                                                                 |                                                                                                                                                                                                        |                                                                                                           |                                                                         |      |
| 1 | RC20-35 case 4   | 5 y   | M |                                 | 46,XY,r(20)[0.80]                                      | 16529619                                |                                                                                                                                 |                                                                                                                                                                                                        |                                                                                                           |                                                                         |      |
| 1 | RC20-35 case 5   | 8 y   | M |                                 | 46,XY,r(20)[0.22]                                      | 16529619                                |                                                                                                                                 |                                                                                                                                                                                                        |                                                                                                           |                                                                         |      |
| 1 | RC20-35 neonatal | nb    | M |                                 | 46,XY,r(20)                                            | 16529619                                |                                                                                                                                 |                                                                                                                                                                                                        |                                                                                                           |                                                                         |      |
| 1 | RC20-36          | 5 y   | M |                                 | 46,XY,r(20)[0.80]/46,XY[0.20]                          | 16359603                                | Epilepsy responds to vagus nerve stimulation in ring chromosome 20 syndrome                                                     | Parr JR, Pang K, Mollett A, Zaiwalla Z, Selway R, McCormick D, Jayawant S.                                                                                                                             | Dev Med Child Neurol. 2006 Jan;48(1):80; author reply 80. doi: 10.1684/epd.2008.0212.                     | 2006                                                                    |      |
| 1 | RC20-37          | 2 y   | F |                                 | 46,XX,r(20)(p13q13.3)[14]/46,XX[6]                     | 17851150                                | Ring chromosome 20 syndrome without deletions of the subtelomeric and CHRNA4-KCNQ2 genes                                        | Elghezal H, Hannachi H, Mougou S, Kammoun H, Triki C, Saad A.                                                                                                                                          | Eur J Med Genet. 2007 Nov-Dec;50(6):441-5. doi: 10.1016/j.eplepsyres.2006.09.006.                         | 2007                                                                    |      |
| 1 | RC20-38          | 24 y  | F | de novo                         | > 42 y                                                 | 46,XX,r(20)(p13q13.3)[0.10]/46,XX[0.90] | 17079116                                                                                                                        | More severe epilepsy and cognitive impairment in the offspring of a mother with mosaicism for the ring 20 chromosome                                                                                   | Herrgård E, Mononen T, Mervaala E, Kuusela L, Aikiä M, Stenbäck U, Pääkkönen L, Airaksinen RL, Kälviäinen | Epilepsia. 2007 Jan;73(1):122-8. doi: 10.1016/j.eplepsyres.2006.09.006. | 2007 |
| 0 | RC20-38 daughter | 7 y   | F | mat                             | 46,XX,r(20)(p13q13.3)[0.40]/46,XX[0.60]                | 17079116                                |                                                                                                                                 |                                                                                                                                                                                                        |                                                                                                           |                                                                         |      |
| 0 | RC20-38 son      | 5 y   | M | mat                             | 46,XY,r(20)[0.40]/46,XY[0.60]                          | 17079116                                |                                                                                                                                 |                                                                                                                                                                                                        |                                                                                                           |                                                                         |      |
| 1 | RC20-39          | 3 y   | M | d. 13 y cardiovascular collapse | 46,XY,r(20)                                            | 19017565                                | Refractory and lethal status epilepticus in a patient with ring chromosome 20 syndrome                                          | Jacobs J, Bernard G, Andermann E, Dubeau F, Andermann F.                                                                                                                                               | Epileptic Disord. 2008 Dec;10(4):254-9. doi: 10.1684/epd.2008.0212.                                       | 2008                                                                    |      |
| 1 | RC20-40 pt 1     | 7.5 y | F |                                 | 46,XX,r(20)(p13q13.3)                                  | 19583784                                | Ring chromosome 20 syndrome: a link between epilepsy onset and neuropsychological impairment in three children                  | Vignoli A, Canevini MP, Darra F, La Selva L, Fiorini E, Piazzini A, Lazzarotto F, Zucca C, Dalla Bernardina B.                                                                                         | Epilepsia. 2009 Nov;50(11):2420-7. doi: 10.1111/j.1528-1167.2009.02176.x. Epub 2009 Jul                   | 2009                                                                    |      |
| 1 | RC20-40 pt 2     | 9.5 y | F |                                 | 46,XX,r(20)[53]/46,XX[47]                              | 19583784                                |                                                                                                                                 |                                                                                                                                                                                                        |                                                                                                           |                                                                         |      |
| 1 | RC20-40 pt 3     | 4 y   | F | > 20 y                          | 46,XX,r(20)[26]/46,XX[74]                              | 19583784                                |                                                                                                                                 |                                                                                                                                                                                                        |                                                                                                           |                                                                         |      |
| 5 | RC20-41          |       |   |                                 |                                                        | 20927024                                | Exploring dopaminergic activity in ring chromosome 20 syndrome: a SPECT study                                                   | Del Sole A, Chiesa V, Lucignani G, Vignoli A, Giordano L, Lecchi M,                                                                                                                                    | Q J Nucl Med Mol Imaging. 2010 Oct;54(5):564-9.                                                           | 2010                                                                    |      |
| 1 | RC20-42 case BV  | 12 y  | F |                                 | 46,XX,r(20)[0.42]                                      | 20939888                                | Genetic investigations on 8 patients affected by ring 20 chromosome syndrome                                                    | Giardino D, Vignoli A, Ballarati L, Recalcati MP, Russo S, Camporeale N, Marchi M, Finelli P, Accorsi P,                                                                                               | BMC Med Genet. 2010 Oct 12;11:146. doi: 10.1186/1471-2350-11-146.                                         | 2010                                                                    |      |
| 1 | RC20-42 case PE  | 14 y  | F |                                 | 46,XX,r(20)[0.34]                                      | 20939888                                |                                                                                                                                 |                                                                                                                                                                                                        |                                                                                                           |                                                                         |      |
| 1 | RC20-42 case MM  | pn    | F | CTB                             | 46,XX,r(20)[0.30]                                      | 20939888                                |                                                                                                                                 |                                                                                                                                                                                                        |                                                                                                           |                                                                         |      |
| 1 | RC20-43          | 5 y   | F |                                 | PB: 46,XX,r(20)[0.34], SF: 46,XX,r(20)(p13q13.3)[0.08] | 22000318                                | New association between ring chromosome 20 syndrome and hypomelanosis of Ito                                                    | Cappanera S, Passamonti C, Zamponi N.                                                                                                                                                                  | Pediatr Neurol. 2011 Nov;45(5):341-3. doi: 10.1016/j.pediatrneurol.2011.08.006.                           | 2011                                                                    |      |
| 1 | RC20-44          | 13 y  | F |                                 | 46,XX,r(20)[0.77]                                      | 21397468                                | [Polymorphic expression of epilepsy and cognitive impairment in ring chromosome 20 syndrome]                                    | Villéga F, Ngayap H, Espil-Taris C, Husson M, Rooryck-Thambo C, Arveiler B, Lacombe D, Pédespan JM.                                                                                                    | Arch Pediatr. 2011 Apr;18(4):394-6. doi: 10.1016/j.arcped.2010.12.025.                                    | 2011                                                                    |      |
| 0 | RC20-45          |       |   |                                 |                                                        | 20972251                                | Molecular analysis of ring chromosome 20 syndrome reveals two distinct groups of patients                                       | Conlin LK, Kramer W, Hutchinson AL, Li X, Riethman H, Hakonarson H, Mulley JC, Scheffer IE, Berkovic SF, Hosain SA, Cignini P, Dugo N, Giorlandino C, Gauci R, Spata A, Capriglione S, Cafà EV.        | J Med Genet. 2011 Jan;48(1):1-9. doi: 10.1136/jmg.2010.080382. Epub 2010 Oct 23.                          | 2011                                                                    |      |
| 1 | RC20-46          | pn    | F | top                             | Twin: 46,XY and 46,XX,r(20)[44]/45,XX,-20[6]           | 23272278                                | Prenatal diagnosis of a fetus with a ring chromosome 20 characterized by array-CGH                                              | Cignini P, Dugo N, Giorlandino C, Gauci R, Spata A, Capriglione S, Cafà EV.                                                                                                                            | J Prenat Med. 2012 Oct;6(4):72-3.                                                                         | 2012                                                                    |      |
| 1 | RC20-47          | adult | F | > 20 y                          | 46,XX,r(20)                                            | 23157113                                | [A case of epilepsy with ring chromosome 20 syndrome]                                                                           | Tanaka A, Ohtake M, Yoshimi T, Suzuki T, Abe I, Iwasaki H, Sue H, Kaito K.                                                                                                                             | Rinsho Byori. 2012 Sep;60(9):847-52.                                                                      | 2012                                                                    |      |
| 1 | RC20-48          | 9 y   | F |                                 | 46,XX,r(20)[53]/46,XX[47]                              | 22738216                                | Ictal involvement of the nigrostriatal system in subtle seizures of ring chromosome 20 epilepsy                                 | Meletti S, Vignoli A, Benuzzi F, Avanzini P, Ruggieri A, Pugnaghi M, Nichelli P,                                                                                                                       | Epilepsia. 2012 Aug;53(8):e156-60. doi: 10.1111/j.1528-                                                   | 2012                                                                    |      |
| 1 | RC20-49          | 9 y   | F |                                 | 46,XX,r(20)[12]/46,XX[38]                              | 22591830                                | Gelastic seizures in ring chromosome 20 syndrome: a case report with video illustration                                         | Dimova P, Boneva I, Todorova A, Minotti L, Kahane P.                                                                                                                                                   | Epileptic Disord. 2012 Jun;14(2):181-6. doi: 10.1684/epd.2012.0508.                                       | 2012                                                                    |      |
| 1 | RC20-50          | 9 y   | M |                                 | 46,XY,r(20)[15]/46,XY[35]                              | 21858587                                | Cognitive impairment and abnormal behaviour related to ring chromosome 20 aberration                                            | Gahr M, Kerling F, Ludolph A, Plener P.                                                                                                                                                                | J Autism Dev Disord. 2012 Jun;42(6):1146-8. doi: 10.1007/s10803-011-1346-2.                               | 2012                                                                    |      |

|   |                |       |   |         |                                                 |          |                                                                                                                                          |                                                                                                                                                                                                                                                                                 |                                                                                                       |      |
|---|----------------|-------|---|---------|-------------------------------------------------|----------|------------------------------------------------------------------------------------------------------------------------------------------|---------------------------------------------------------------------------------------------------------------------------------------------------------------------------------------------------------------------------------------------------------------------------------|-------------------------------------------------------------------------------------------------------|------|
| 1 | RC20-51 pt1    | 4 y   | F |         | 46,XX,r(20)[25]                                 | 22424860 | Ring chromosome 20 syndrome: electroclinical description of six patients and review of the literature                                    | Elens I, Vanrykel K, De Waele L, Jansen K, Segeren M, Van Paesschen W, Ceulemans B, Boel M, Frijns JP, Buyse                                                                                                                                                                    | Epilepsy Behav. 2012 Apr;23(4):409-2012<br>doi: 10.1016/j.yebeh.2012.02.008. Epub                     | 2012 |
| 1 | RC20-51 pt2    | 6 y   | M |         | 46,XY,r(20)[0.40]                               | 22424860 |                                                                                                                                          |                                                                                                                                                                                                                                                                                 |                                                                                                       |      |
| 1 | RC20-51 pt3    | 6 y   | M | > 53 y  | 46,XY,r(20)[0.16]                               | 22424860 |                                                                                                                                          |                                                                                                                                                                                                                                                                                 |                                                                                                       |      |
| 1 | RC20-51 pt4    | 16 y  | F | > 66 y  | 46,XX,r(20)[0.18]/45,X,-20[0.04]                | 22424860 |                                                                                                                                          |                                                                                                                                                                                                                                                                                 |                                                                                                       |      |
| 1 | RC20-51 pt5    | 13 y  | M | > 22 y  | 36,XY,r(20)[0.13]                               | 22424860 |                                                                                                                                          |                                                                                                                                                                                                                                                                                 |                                                                                                       |      |
| 1 | RC20-51 pt6    | 5 y   | M |         | 46,XY,r(20)                                     | 22424860 |                                                                                                                                          |                                                                                                                                                                                                                                                                                 |                                                                                                       |      |
| 1 | RC20-52        | 17 y  | F |         | 46,XX,r(20)                                     | 22246017 | Frontal motor seizure following non-convulsive status epilepticus in ring chromosome 20                                                  | Kamoun FF, Ellouz EJ, Hsairi IG, Triki CC.                                                                                                                                                                                                                                      | Neurosciences (Riyadh). 2012 Jan;17(1):74-7.                                                          | 2012 |
| 1 | RC20-53 case 1 | 5 y   | M |         | 46,XY,r(20)[0.25]/46,XY[0.75]                   | 22000954 | The evolving electroclinical syndrome of "epilepsy with ring chromosome 20"                                                              | Radhakrishnan A, Menon RN, Hariharan S, Radhakrishnan K.                                                                                                                                                                                                                        | Seizure. 2012 Mar;21(2):92-7. doi: 10.1016/j.seizure.2011.09.009.                                     | 2012 |
| 1 | RC20-53 case 2 | 2.5 y | M |         | 46,XY,r(20)[0.06]/46,XY[0.94]                   | 22000954 |                                                                                                                                          |                                                                                                                                                                                                                                                                                 |                                                                                                       |      |
| 1 | RC20-53 case 3 | 10 y  | M | > 20 y  | 46,XY,r(20)[0.40]/46,XY[0.60]                   | 22000954 |                                                                                                                                          |                                                                                                                                                                                                                                                                                 |                                                                                                       |      |
| 0 | RC20-54        |       |   |         |                                                 | 24330998 | [Ring chromosome 20 syndrome]                                                                                                            | Chen CH, Wu HS.                                                                                                                                                                                                                                                                 | Zhonghua Er Ke Za Zhi. 2013 Sep;51(9):710-2.                                                          | 2013 |
| 1 | RC20-55        | 6 y   | F |         | 46,XX,r(20)[p13q13.3][11]/46,XX[9]              | 23916860 | Ring chromosome 20: a pediatric potassium channelopathy responsive to treatment with ezogabine                                           | Walleigh DJ, Legido A, Valencia I.                                                                                                                                                                                                                                              | Pediatr Neurol. 2013 Nov;49(5):368-2013<br>doi: 10.1016/j.pediatrneurol.2013.06.005. Epub 2013 Aug 2. | 2013 |
| 1 | RC20-56 no.1   | 2.5 y | F |         | 46,XX,r(20)[0.29]                               | 23731915 | Sleep in ring chromosome 20 syndrome: a peculiar electroencephalographic pattern                                                         | Zambrelli E, Vignoli A, Nobili L, Didato G, Mastrangelo M, Turner K, Canevini                                                                                                                                                                                                   | Funct Neurol. 2013 Jan-Mar;28(1):47-53.                                                               | 2013 |
| 1 | RC20-56 no.2   | 6 y   | F |         | 46,XX,r(20)[0.33]                               | 23731915 |                                                                                                                                          |                                                                                                                                                                                                                                                                                 |                                                                                                       |      |
| 1 | RC20-56 no.3   | 9 y   | F |         | 46,XX,r(20)[0.53]                               | 23731915 |                                                                                                                                          |                                                                                                                                                                                                                                                                                 |                                                                                                       |      |
| 1 | RC20-56 no.4   | 21 y  | M | > 34 Y  | 46,XY,r(20)[0.13]                               | 23731915 |                                                                                                                                          |                                                                                                                                                                                                                                                                                 |                                                                                                       |      |
| 1 | RC20-56 no.5   | 5 y   | M | > 30 y  | 46,XY,r(20)[0.83]                               | 23731915 |                                                                                                                                          |                                                                                                                                                                                                                                                                                 |                                                                                                       |      |
| 1 | RC20-56 no.6   | 11 y  | F | > 59 y  | 46,XX,r(20)[0.12]                               | 23731915 |                                                                                                                                          |                                                                                                                                                                                                                                                                                 |                                                                                                       |      |
| 1 | RC20-57        | 5 y   | F |         | 46,XX,r(20)[p13q13.3][22]/46,XX[28]             | 23188914 | Two siblings with similar phenotypes: one of them had ring 20 chromosome                                                                 | Tezer FI, Aktas D, Alikasifoglu M, Saygi S.                                                                                                                                                                                                                                     | Clin EEG Neurosci. 2013 Jan;44(1):58-61. doi: 10.1177/1550059412451700. Epub 2012 Nov 27.             | 2013 |
| 1 | RC20-58        |       |   |         |                                                 | 25391199 | Rare epileptic syndrome of ring chromosome 20 with epileptic encephalopathy: a case report                                               | Wechapinan T, Sri-Udomkajorn S, Suwannachote S.                                                                                                                                                                                                                                 | J Med Assoc Thai. 2014 Jun;97 Suppl 6:S239-42.                                                        | 2014 |
| 1 | RC20-59        | 14 y  | M |         | 46,XY[23]/46,XY,r(20)[p13q13.3][25]             | 24819941 | [Electroclinical characteristics of a patient with ring chromosome 20 syndrome]                                                          | Vega-Zelaya L, Alonso-Cerezo C, Quesada JF, Sola RG, Pastor J.                                                                                                                                                                                                                  | Rev Neurol. 2014 May 16;58(10):450-4.                                                                 | 2014 |
| 0 | RC20-60        |       |   |         |                                                 | 24483620 | Epilepsy-related brain networks in ring chromosome 20 syndrome: an EEG-fMRI study                                                        | Vaudano AE, Ruggieri A, Vignoli A, Avanzini P, Benuzzi F, Gessaroli G, Nichelli PF, Darra F, Cantalupo G, Avanzini P, Vaudano AE, Vignoli A, Ruggieri A, Benuzzi F, Darra F, Mastrangelo M, Dalla Bernardina B, Arévalo-Sáenz A, Torres CV, Pastor J, Alonso-Cerezo C, Sola RG. | Epilepsia. 2014 Mar;55(3):403-13. doi: 10.1111/epi.12539. Epub 2014 Jan 31.                           | 2014 |
| 0 | RC20-61        |       |   |         |                                                 | 23968845 | Low frequency mu-like activity characterizes cortical rhythms in epilepsy due to ring chromosome 20                                      | Avanzini P, Vaudano AE, Vignoli A, Ruggieri A, Benuzzi F, Darra F, Mastrangelo M, Dalla Bernardina B, Arévalo-Sáenz A, Torres CV, Pastor J, Alonso-Cerezo C, Sola RG.                                                                                                           | Clin Neurophysiol. 2014 Feb;125(2):239-49. doi: 10.1016/j.clinph.2013.07.009. Epub                    | 2014 |
| 1 | RC20-62        | 6 y   | F | > 43 y  | 46,XX,r(20)                                     | 26062827 | [Stimulation of the centromedian nucleus in refractory epilepsy associated to ring chromosome 20]                                        | Arévalo-Sáenz A, Torres CV, Pastor J, Alonso-Cerezo C, Sola RG.                                                                                                                                                                                                                 | Rev Neurol. 2015 Jun 16;60(12):548-2015<br>52.                                                        | 2015 |
| 0 | RC20-63        |       |   |         |                                                 | 27816898 | Epilepsy in ring chromosome 20 syndrome                                                                                                  | Vignoli A, Bisulli F, Darra F, Mastrangelo M, Barba C, Giordano L, Turner K, Zambrelli E, Chiesa V, Bova S, Fiocchi I, Peron A, Naldi I, Milito G, Freire de Moura M, Flores-Guevara R, Gueguen B, Biraben A, Renault F.                                                        | Epilepsy Res. 2016 Dec;128:83-93. doi: 10.1016/j.eplepsyres.2016.10.004. Epub 2016 Oct 24.            | 2016 |
| 0 | RC20-64        |       |   |         |                                                 | 27009934 | Long-term EEG in patients with the ring chromosome 20 epilepsy syndrome                                                                  | Freire de Moura M, Flores-Guevara R, Gueguen B, Biraben A, Renault F.                                                                                                                                                                                                           | Epilepsia. 2016 May;57(5):e94-6. doi: 10.1111/epi.13352. Epub 2016 Mar 24.                            | 2016 |
| 1 | RC20-65        | 7 y   | F |         | 46,XX,r(20)[p13q13.3][23]/45,XX,-20[1]/46,XX[6] | 26980640 | Refractory and severe status epilepticus in a patient with ring chromosome 20 syndrome                                                   | Hirano Y, Oguni H, Nagata S.                                                                                                                                                                                                                                                    | Brain Dev. 2016 Sep;38(8):746-9. doi:                                                                 | 2016 |
| 1 | RC20-66        | 9 y   | F |         | 46,XX,r(20)[p13q13.3][23/169]                   | 27066580 | Co-occurrence of 16p13.11 microdeletion and ring chromosome 20 syndrome                                                                  | Rodan LH, Zak M, Stavropoulos J, Joseph-George AM, Minassian BA.                                                                                                                                                                                                                | Neurol Genet. 2016 Jan 14;2(1):e43. doi:                                                              | 2016 |
| 1 | RC20-67        | 17 y  | F | > 25 y  | 46,XX,r(20) mos                                 | 26240087 | Significant Improvements of EEG and Clinical Findings With Oral Lacosamide in a Patient With Ring Chromosome 20                          | Onder H, Tezer FI.                                                                                                                                                                                                                                                              | Clin EEG Neurosci. 2016 Oct;47(4):330-332. doi: 10.1177/1550059415593428. Epub 2015 Aug 2.            | 2016 |
| 1 | RC20-68        | 10 m  | M | de novo | 46,XY,r(20)[p13q13.3]                           | 28482393 | [A patient with ring chromosome 20 syndrome and AGTR2 polymorphisms]                                                                     | Yi Z, Pan H, Li L.                                                                                                                                                                                                                                                              | Zhonghua Er Ke Za Zhi. 2017 May 4;55(5):388-389. doi:                                                 | 2017 |
| 1 | RC20-69        | 10 y  | F | > 35 y  | 46,XX,r(20)[p13q13][0.30]/46,XX[0.70]           | 28181065 | Phenotypical heterogeneity of morpheic seizures in ring chromosome 20 syndrome: a videopolysomnographic evidence.                        | Giuliano L, Fatuzzo D, Mainieri G, Sofia V, Zappia M                                                                                                                                                                                                                            | Neurol Sci. 2017 May;38(5):925-926. doi: 10.1007/s10072-017-2838-4. Epub 2017 Feb 8. PMID:            | 2017 |
| 1 | RC20-70        | 6 y   | F |         | 46,XX,r(20)[0.20]                               | 30455928 | Lithium improved behavioral and epileptic symptoms in an adolescent with ring chromosome 20 and bipolar disorder not otherwise specified | Inal A, Chaumette B, Soleimani M, Guerrot AM, Goldenberg A, Lebas A, Gerardin P, Ferrafiat V.                                                                                                                                                                                   | Clin Case Rep. 2018 Oct 12;6(11):2234-2239. doi: 10.1002/ccr3.1796. eCollection 2018 Nov.             | 2018 |

|            |                |       |   |         |                  |                                                                         |          |                                                                                                                                    |                                                                                                                                                 |                                                                                                        |      |
|------------|----------------|-------|---|---------|------------------|-------------------------------------------------------------------------|----------|------------------------------------------------------------------------------------------------------------------------------------|-------------------------------------------------------------------------------------------------------------------------------------------------|--------------------------------------------------------------------------------------------------------|------|
| 1          | RC20-71 pt 1   | 6 y   | F |         |                  | 46,XX,r(20)[0.84]                                                       | 29414555 | Specificity of electroclinical features in the diagnosis of ring chromosome 20                                                     | Gago-Veiga AB, Toledano R, García-Morales I, Pérez-Jiménez MA, Bernar J,                                                                        | Epilepsy Behav. 2018 Mar;80:215-220. doi:                                                              | 2018 |
| 1          | RC20-71 pt 2   | 2 y   | F |         |                  | 46,XX,r(20)[0.70]                                                       | 29414555 |                                                                                                                                    |                                                                                                                                                 |                                                                                                        |      |
| 1          | RC20-71 pt 3   | 12 y  | F |         | > 30 y           | 46,XX,r(20)[0.22]                                                       | 29414555 |                                                                                                                                    |                                                                                                                                                 |                                                                                                        |      |
| 1          | RC20-71 pt 4   | 13 y  | F |         | > 27 y           | 46,XX,r(20)[0.30]                                                       | 29414555 |                                                                                                                                    |                                                                                                                                                 |                                                                                                        |      |
| 1          | RC20-71 pt 5   | 9 y   | F |         |                  | 46,XX,r(20)[0.46]                                                       | 29414555 |                                                                                                                                    |                                                                                                                                                 |                                                                                                        |      |
| 1          | RC20-71 pt 6   | 4 y   | M |         |                  | 46,XY,r(20)[0.44]                                                       | 29414555 |                                                                                                                                    |                                                                                                                                                 |                                                                                                        |      |
| 1          | RC20-72        | 2 y   | F | mat     | > 20 y (mat)     | 46,XX,r(20)[0.50], mat 46,XX,r(20)[0.12]                                | 30385235 | A further case of familial ring chromosome 20 mosaicism - molecular characterization of the ring and review of the literature      | Unterberger I, Dobesberger J, Schober H, Krabichler B, Lamina C, Schatz U, Zschocke J, Luef G, Kotzot D, Fauth C, Patil AA, Vinayan KP, Roy AG. | Eur J Med Genet. 2019 Nov;62(11):103564. doi: 10.1016/j.ejmg.2018.10.016. Epub Oct;23(5):718-722. doi: | 2019 |
| 1          | RC20-73 case 1 | 6 m   | M |         |                  | 46,XY[0.88]/46,XY,r(20)[0.12]                                           | 33623285 | Epilepsy in Ring Chromosome 20 Syndrome Might Have Variable Clinical Features                                                      | Unterberger I, Dobesberger J, Schober H, Krabichler B, Lamina C, Schatz U, Zschocke J, Luef G, Kotzot D, Fauth C, Patil AA, Vinayan KP, Roy AG. | Ann Indian Acad Neurol. 2020 Sep-Oct;23(5):718-722. doi:                                               | 2020 |
| 1          | RC20-73 case 2 | 6 m   | F |         |                  | 46,XX,r(20)                                                             | 33623285 |                                                                                                                                    |                                                                                                                                                 |                                                                                                        |      |
| 1          | RC20-74 case 1 | 11 y  | F |         |                  | 46,XX,r(20)                                                             | 32301722 | Praxis-induced reflex seizures in two Japanese cases with ring chromosome 20 syndrome                                              | Yamagishi H, Goto M, Osaka H, Kuwajima M, Muramatsu K, Yamagata                                                                                 | Epileptic Disord. 2020 Apr 1;22(2):214-218. doi:                                                       | 2020 |
| 1          | RC20-74 case 2 | 6 y   | M |         |                  | 46,XY,r(20)                                                             | 32301722 |                                                                                                                                    |                                                                                                                                                 |                                                                                                        |      |
| 1          | RC20-75        | 7 y   | M |         |                  | 46,XY,r(20)[p13q13.3][4]/46,XY[26]                                      | 32247529 | Improvement of epilepsy with lacosamide in a patient with ring chromosome 20 syndrome                                              | Tayama T, Mori T, Goji A, Toda Y, Kagami S.                                                                                                     | Brain Dev. 2020 Jun;42(6):473-476. doi:                                                                | 2020 |
| 1          | RC20-76        | nb    | F | de novo |                  | 46,XX,r(20)                                                             | 32082653 | Candidate Genes Associated with Delayed Neuropsychomotor Development and Seizures in a Patient with Ring Chromosome 20             | Corrêa T, Venâncio AC, Galera MF, Riegel M.                                                                                                     | Case Rep Genet. 2020 Jan 21;2020:5957415. doi: 10.1155/2020/5957415. eCollection                       | 2020 |
| 1          | RC20-77        | 10 y  | F |         | > 21 y           | 46,XX,t(1;12)(q21;q11),r(20)[14/25]                                     | 35002161 | A Case of Drug-resistant Epilepsy Associated with Ring Chromosome 20                                                               | Balabhadra A, Parekh M, Patil A                                                                                                                 | Ann Indian Acad Neurol. 2021 Sep-Oct;24(5):805-807                                                     | 2021 |
| 1          | RC20-TECH pt 1 | 9 y   | M |         | > 34 y           | 46,XY,r(20)                                                             | 33207017 | Transcriptome analysis of a ring chromosome 20 patient cohort                                                                      | Myers KA, Bennett MF, Hildebrand MS, Coleman MJ, Zhou G, Hollingsworth G, Cairns A, Riney K, Berkovic SF, Bahlo                                 | Epilepsia. 2021 Jan;62(1):e22-e28. doi: 10.1111/epi.16766. Epub 2020 Nov 18.                           | 2021 |
| 1          | RC20-TECH pt 2 | 6 y   | F |         |                  | 46,XX,r(20)[0.73]                                                       | 33207017 |                                                                                                                                    |                                                                                                                                                 |                                                                                                        |      |
| 1          | RC20-78        | 7 y   | M |         |                  | 46,XY,r(20)[0.62]                                                       | 35196643 | Intravenous methylprednisolone is a potential add on therapy for Ring chromosome 20 syndrome                                       | Kishore VK, Viswanathan LG, Asranna A, Kenchiah R, Chowdary M R, Sinha S.                                                                       | Seizure. 2022 Feb 5;96:118-120.                                                                        | 2022 |
| <b>118</b> | <b>80</b>      |       |   |         |                  |                                                                         |          |                                                                                                                                    |                                                                                                                                                 |                                                                                                        |      |
| 1          | RC21-1         | 10 y  | F |         |                  | 46,XX,r(21)                                                             | 1242523  | [A dysplasia-epilepsy syndrome in a patient with ring chromosome 21]                                                               | Kunze J, Doose H, Tolkdorf M.                                                                                                                   | Neuropadiatrie. 1975 Nov;6(4):398-402. doi: 10.1055/s-0028-1091680.                                    | 1975 |
| 1          | RC21-2         |       |   |         |                  |                                                                         | 1154140  | Clinical and cytogenetic aspects of the 21 deletion syndrome                                                                       | Gericke GS, Steyn MF, Retief AE, Thom JC, Van Niekerk WA.                                                                                       | S Afr Med J. 1975 Jun 7;49(24):959-64.                                                                 | 1975 |
| 1          | RC21-3         |       |   |         |                  | 46,XY,r(21)                                                             | 1004994  | [Ring chromosome 21. A new case]                                                                                                   | Larget-Piet L, Berthelot J, Guittet J, Hamon A, Larget-Piet A, Rouchy R.                                                                        | Pediatrie. 1976 Sep;31(6):539-49.                                                                      | 1976 |
| 1          | RC21-4         |       |   |         |                  |                                                                         | 955958   | [Ring chromosome 21]                                                                                                               | Neuhäuser G.                                                                                                                                    | Hippokratès. 1976 Aug;47(3):246-7.                                                                     | 1976 |
| 1          | RC21-5         |       |   |         |                  |                                                                         | 278545   | Missing X chromosome and ring chromosome 21 in a case of acute myelomonocytic leukemia                                             | Olinici CD, Marinca E, Macavei I, Dobay O.                                                                                                      | Arch Geschwulstforsch. 1978;48(3):202-4.                                                               | 1978 |
| 1          | RC21-6         | nb    | M | de novo |                  | PB/BM/SF: 46,XY,r(21)/45,XY,-21                                         | 7332027  | Analysis of banding patterns in a case of ring chromosome 21                                                                       | Richer CL, Fitch N, Sitahal S, Murer-Orlando M, Jean P.                                                                                         | Am J Med Genet. 1981;10(4):323-31. doi: 10.1002/ajmg.1320100404.                                       | 1981 |
| 1          | RC21-7         | 2.5 y | M |         |                  |                                                                         | 7037042  | Acute megakaryoblastic leukaemia associated with intrinsic platelet dysfunction and constitution ring 21 chromosome in a young boy | Pui CH, Williams DL, Scarborough V, Jackson CW, Price R, Murphy S.                                                                              | Br J Haematol. 1982 Feb;50(2):191-200. doi: 10.1111/j.1365-2141.1982.tb01909.x.                        | 1982 |
| 1          | RC21-8 pt 1/2  | pn    | M | mat     | CP, > 28 y (mat) | 46,XY,r(21)                                                             | 6228144  | Ring chromosome 21 in phenotypically apparently normal persons: report of two families from Switzerland and Italy                  | Schmid W, Tenconi R, Baccichetti C, Caufin D, Schinzel A.                                                                                       | Am J Med Genet. 1983 Nov;16(3):323-9. doi: 10.1002/ajmg.1320160305.                                    | 1983 |
| 1          | RC21-8 pt 3/4  | nb    | F | mat     | > 38 y (mat)     | 46,XX[0.97]/47,XX,+r(21)[p11q22.3][0.03] mat: 46,XX,r(21)[p11q22.3][48] | 6228144  |                                                                                                                                    |                                                                                                                                                 |                                                                                                        |      |
| 1          | RC21-9         |       |   |         |                  |                                                                         | 6680430  | [Description of a case of ring chromosome 21 and pericentric inversion of Y chromosome]                                            | Ponzio G, Carozzi F, Dragone E, Spada A, Brignone S, De Marchi M, Carbonara                                                                     | Pathologica. 1983;75 Suppl:276-9.                                                                      | 1983 |
| 1          | RC21-10        | 25 y  | F |         |                  | 46,XX,r(21)                                                             | 6745921  | Ring chromosome 21 in a healthy woman with three spontaneous abortions                                                             | Rhomberg K.                                                                                                                                     | Hum Genet. 1984;67(1):120. doi: 10.1007/BF00270571.                                                    | 1984 |
| 1          | RC21-11        | pn    | M | de novo | cp               | 46,XY,r(p13q22.3)/45,XY,-21                                             | 6510909  | Prenatal detection of an unstable ring 21 chromosome                                                                               | Stetten G, Sroka B, Corson VL, Boehm CD.                                                                                                        | Hum Genet. 1984;68(4):310-3. doi: 10.1007/BF00292590.                                                  | 1984 |
| 1          | RC21-12        | nb    | F |         |                  | 46,XX,r(21)/45,XX,-21                                                   | 6335374  | Ring chromosome 21. Observation in a female infant                                                                                 | Carlo Stella N, Barberi I, Corrado F, Triolo O.                                                                                                 | Ann Genet. 1984;27(4):249-51.                                                                          | 1984 |
| 1          | RC21-13        |       |   |         |                  |                                                                         | 6331791  | Ring chromosome 21 in a normal female                                                                                              | Kleczkowska A, Fryns JP.                                                                                                                        | Ann Genet. 1984;27(2):126-8.                                                                           | 1984 |
| 0          | RC21-13 (FU)   |       |   |         |                  |                                                                         | 3499841  | Ring chromosome 21 in the mother and 21/21 translocation in the fetus: karyotype: 45,XX,-21,-21,+t(21;21)(p11;q11)                 | Fryns JP, Kleczkowska A.                                                                                                                        | Ann Genet. 1987;30(2):109-10.                                                                          | 1987 |

|   |                |             |   |         |                                                                                                              |         |                                                                                                                                                  |                                                                                                               |                                                                                      |      |
|---|----------------|-------------|---|---------|--------------------------------------------------------------------------------------------------------------|---------|--------------------------------------------------------------------------------------------------------------------------------------------------|---------------------------------------------------------------------------------------------------------------|--------------------------------------------------------------------------------------|------|
| 1 | RC21-14 case 1 | nb          | M |         | 46,XY,r(21)/45,XY,-21                                                                                        | 6714262 | Three new cases of partial monosomy 21 resulting from one ring 21 chromosome and two unbalanced reciprocal translocations                        | Philip N, Baeteman MA, Mattei MG, Mattei JF.                                                                  | Eur J Pediatr. 1984 Apr;142(1):61-4. doi: 10.1007/BF00442594.                        | 1984 |
| 1 | RC21-15        | 27 y        | M |         | 46,XY,r(21)(p11q22.3)                                                                                        | 4075565 | Ring chromosome 21 in a phenotypically normal but infertile man                                                                                  | Huret JL, Leonard C, Kanoui V.                                                                                | Clin Genet. 1985 Dec;28(6):541-5. doi: 10.1111/j.1399-0004.1985.tb00423.x.           | 1985 |
| 1 | RC21-16        | pn          | M | de novo | CTB AF/SF: 46,XY,r(21)(p13q22)/45,XY,-21/r-var                                                               | 3160292 | Ring chromosome 21: characterization of DNA sequences at sites of breakage and reunion                                                           | Kazazian HH Jr, Antonarakis SE, Wong C, Trusko SP, Stetten G, Oliver M, Potter MJ, Gusella JF, Watkins PC.    | Ann N Y Acad Sci. 1985;450:33-42. doi: 10.1111/j.1749-6632.1985.tb21481.x.           | 1985 |
| 1 | RC21-17        | nb          | F | de novo | 46,XX,r(21)(p11.2q22.3)[0.77]/45,XX,-21[0.23]                                                                | 3564968 | Ring chromosome 21 and SOD activity of blood cells                                                                                               | Aoki T, Yoshimitsu K, Itodagawa M, Okazaki H, Sugimoto T, Kobayashi Y.                                        | Acta Paediatr Scand. 1986 Nov;75(6):1055-8. doi: 10.1111/j.1651-2227.1986.tb10343.x. | 1986 |
| 1 | RC21-18        |             |   |         |                                                                                                              | 3733078 | Ring chromosome 21 in healthy persons: different consequences in females and in males                                                            | Dallapiccola B, De Filippis V, Notarangelo A, Perla G, Zelante L.                                             | Hum Genet. 1986 Jul;79(3):218-20. doi: 10.1007/BF00401230.                           | 1986 |
| 1 | RC21-19        | 8 m         | M |         | 46,XY,r(21)(p13q22.3)[44]/45,XY,-21[4]/r-var[2]                                                              | 3815879 | Ring 21 chromosome: the mild end of the phenotypic spectrum                                                                                      | Gardner RJ, Monk NA, Clarkson JE, Allen GJ.                                                                   | Clin Genet. 1986 Dec;30(6):466-70. doi: 10.1111/j.1399-0004.1986.tb01912.x.          | 1986 |
| 0 | RC21-20        |             |   |         |                                                                                                              | 3621668 | Holoprosencephaly associated with ring chromosome 21                                                                                             | Hoovers JM, Jansweijer MC.                                                                                    | Clin Genet. 1987 Sep;32(3):207. doi: 10.1111/j.1399-0004.1987.tb03357.x.             | 1987 |
| 1 | RC21-21        | 13 y        | M |         | 46,XY,r(21)c                                                                                                 | 3474055 | Acute lymphoblastic leukemia in a child with constitutional ring chromosome 21                                                                   | Falchi AM, Orofino MG, Nucaro AL, De Virgiliis S, Cao A.                                                      | Cancer Genet Cytogenet. 1987 Aug;27(2):219-24. doi: 10.1016/0165-4608(87)90003-3.    | 1987 |
| 1 | RC21-22        | 15 y        | M | mat     | > 20 y (mat) 46,XY,r(21), mat: 46,XX,r(21)(p11q22.3)                                                         | 2887318 | Familial transmission of a ring chromosome 21                                                                                                    | Hertz JM.                                                                                                     | Clin Genet. 1987 Jul;32(1):35-9. doi: 10.1111/j.1399-0004.1987.tb03320.x.            | 1987 |
| 1 | RC21-23        | 3 m         | M | de novo | 46,XY,r(21)                                                                                                  | 3568433 | A male infant with holoprosencephaly, associated with ring chromosome 21                                                                         | Aronson DC, Jansweijer MC, Hoovers JM, Barth PG.                                                              | Clin Genet. 1987 Jan;31(1):48-52. doi: 10.1111/j.1399-0004.1987.tb02766.x.           | 1987 |
| 1 | RC21-24        |             |   |         |                                                                                                              | 2960262 | Tandem duplication chromosome 21 in the offspring of a ring chromosome 21 carrier                                                                | Miller K, Reimer A, Schulze B.                                                                                | Ann Genet. 1987;30(3):180-2.                                                         | 1987 |
| 1 | RC21-25        | 3.5 y       | M | de novo | PB: 45,XY,-21, SF: 46,XY,r(21)[0.80]/45,XY,-21[0.20]                                                         | 3236369 | Apparent monosomy 21 owing to a ring 21 chromosome: parental origin revealed by DNA analysis                                                     | Dalgleish R, Duckett DP, Woodhouse M, Shannon RS, Young ID.                                                   | J Med Genet. 1988 Dec;25(12):851-4. doi: 10.1136/jmg.25.12.851.                      | 1988 |
| 0 | RC21-26        |             |   |         |                                                                                                              | 2648387 | Molecular mechanism in the formation of a human ring chromosome 21                                                                               | Wong C, Kazazian HH Jr, Stetten G, Earnshaw WC, Van Keuren ML, Antonarakis SE.                                | Proc Natl Acad Sci U S A. 1989 Mar;86(6):1914-8. doi: 10.1073/pnas.86.6.1914.        | 1989 |
| 1 | RC21-27        |             |   |         |                                                                                                              | 2741714 | Ring chromosome 21                                                                                                                               | Zergollern L, Muzinic D, Raic Z.                                                                              | Acta Med Jugosl. 1989;43(2):147-56.                                                  | 1989 |
| 1 | RC21-28        | 6 m         | M | mat     | > 20 y (mat) 46,XY,r(21)(p13q22.3) mat: 46,XX,r(21)(p13q22.3)                                                | 2253944 | Maternal transmission of ring chromosome 21                                                                                                      | Kennerknecht I, Barbi G, Vogel W.                                                                             | Hum Genet. 1990 Nov;86(1):99-101. doi: 10.1007/BF00205185.                           | 1990 |
| 1 | RC21-29        | nb          | F | mat     | > 20 y (mat) 46,XX,r(21)(p11.2q22.3)                                                                         | 2369070 | Ring chromosome 21 transmitted from mother to daughter: its stability in a lymphoblastoid cell line                                              | Ikeuchi T, Yamamoto K, Qiao F, Hayakawa K, Migita T, Nishikawa Y.                                             | Ann Genet. 1990;33(1):32-5.                                                          | 1990 |
| 0 | RC21-30        |             |   |         |                                                                                                              | 1346075 | Mechanisms of ring chromosome formation in 11 cases of human ring chromosome 21                                                                  | McGinniss MJ, Kazazian HH Jr, Stetten G, Petersen MB, Boman H, Engel E, Greenberg F, Hertz JM, Johnson A,     | Am J Hum Genet. 1992 Jan;50(1):15-28.                                                | 1992 |
| 1 | RC21-31        | 6 m         | F | mat     | > 21 y IV1: 46,XX,r(21) III3 (mat): 46,XX,r(21), II-4 (gmat):                                                | 1308361 | Stable ring chromosome 21: molecular and clinical definition of the lesion                                                                       | Falik-Borenstein TC, Pribyl TM, Pulst SM, Van Dyke DL, Weiss L, Chu ML,                                       | Am J Med Genet. 1992 Jan 1;42(1):22-8. doi:                                          | 1992 |
| 1 | RC21-32        | 1 y         | F |         | 46,XX,der(18)t(18;21)(q23;q21.1),r(21)(p13q22.3)[0.52]/45,XX,der(18),-21[0.48]                               | 8362906 | Unbalanced translocation, t(18;21), detected by fluorescence in situ hybridization (FISH) in a child with 18q- syndrome and a ring chromosome 21 | McGinniss MJ, Rosenberg C, Stetten G, Schinzel AA, Binkert F, Petersen MB, Kearns WG, Kazazian HH Jr, Pearson | Am J Med Genet. 1993 Jul 1;46(6):647-51. doi: 10.1002/ajmg.1320460609.               | 1993 |
| 1 | RC21-33 case 1 | 1 m         | F | de novo | 46,XX,r(21)                                                                                                  | 7966190 | "Compensatory" uniparental disomy of chromosome 21 in two cases                                                                                  | Bartsch O, Petersen MB, Stuhlmann I, Mau G, Frantzen M, Schwinger E, Melkild A.                               | J Med Genet. 1994 Jul;31(7):534-40. doi: 10.1136/jmg.31.7.534.                       | 1994 |
| 1 | RC21-34        |             |   |         |                                                                                                              | 7507604 | [Ring chromosome 21 as a cause of developmental disorder. A case report from the practice of child psychiatry]                                   |                                                                                                               | Tidsskr Nor Laegeforen. 1994 Jan 10;114(1):36-8.                                     | 1994 |
| 1 | RC21-35        | 14 y        | M |         | 46,XY,r(21)/45,XY,-21                                                                                        | 7847798 | Lens dislocation and optic nerve hypoplasia in ring chromosome 21 mosaicism                                                                      | Meire FM, Fryns JP.                                                                                           | Ann Genet. 1994;37(3):150-2.                                                         | 1994 |
| 1 | RC21-36        | 6 m         | M | de novo | 46,XY,r(21)                                                                                                  | 8591669 | Characterization of a ring chromosome 21 by FISH-technique                                                                                       | Conte RA, Luke S, Verma RS.                                                                                   | Clin Genet. 1995 Oct;48(4):188-91. doi: 10.1111/j.1399-0004.1995.tb04086.x.          | 1995 |
| 1 | RC21-37        | pn, 16 gwks | F | mat     | CP, > 29 y (mat) twin A: 46,XY, twin B: 46,XX,r(21)(p13q22)[0.77]/45,XX,-21[0.23]; mat: 46,XX,r(21)(p13;q22) | 7784385 | Prenatal diagnosis of familial ring 21 chromosome                                                                                                | Melnik AR, Ahmed I, Taylor JC.                                                                                | Prenat Diagn. 1995 Mar;15(3):269-73. doi: 10.1002/pd.1970150310.                     | 1995 |
| 1 | RC21-38        | 3.5 y       | M |         | 46,XY,r(21)(p11q22)                                                                                          | 9370908 | Hypogammaglobulinaemia in a patient with ring chromosome 21                                                                                      | Ohga S, Nakao F, Narazaki O, Fusazaki N, Aoki T, Kamesaki K, Hara T.                                          | Arch Dis Child. 1997 Sep;77(3):252-4. doi: 10.1136/adc.77.3.252.                     | 1997 |

|   |                |             |   |               |                   |                                                                                               |                                                                                     |                                                                                                                                                                                                                           |                                                                                                                                                                                                           |
|---|----------------|-------------|---|---------------|-------------------|-----------------------------------------------------------------------------------------------|-------------------------------------------------------------------------------------|---------------------------------------------------------------------------------------------------------------------------------------------------------------------------------------------------------------------------|-----------------------------------------------------------------------------------------------------------------------------------------------------------------------------------------------------------|
| 1 | RC21-39 CGM-14 | ?           | M |               | 46,XY,r(21)       | 10507727                                                                                      | Molecular characterisation of partial chromosome 21 aneuploidies by fluorescent PCR | Valero R, Marfany G, Gil-Benso R, Ibáñez MA, López-Pajares I, Prieto F,                                                                                                                                                   | J Med Genet. 1999 Sep;36(9):694-9. 1999                                                                                                                                                                   |
| 1 | RC21-40        | 29 y        | F | mat, familial | > 29 y (mat)      | II3/II5: 46XY,r(21)<br>II7: 46,XX,t(21q21q)                                                   | 11384641                                                                            | Familial gonadotropin-releasing hormone resistance and hypogonadotropic hypogonadism in a family with multiple affected individuals                                                                                       | Layman LC, McDonough PG, Cohen DP, Maddox M, Tho SP, Reindollar RH. Fertil Steril. 2001 Jun;75(6):1148-55. doi: 10.1016/s0015-0282(01)01782-4. 2001                                                       |
| 1 | RC21-41        | 31 y        | F |               | > 31 y            | BM/PB: 46,XX,r(21)c<br>BM:<br>46,XX,r1[7]/47,idem,+r2[7]/47,idem,+8[9]<br>/47~48,diem,+r2[15] | 11165321                                                                            | Amplification of the AML1(CBFA2) gene on ring chromosomes in a patient with acute myeloid leukemia and a constitutional ring chromosome 21                                                                                | Streubel B, Valent P, Lechner K, Fonatsch C. Cancer Genet Cytogenet. 2001 Jan 1;124(1):42-6. doi: 10.1016/s0165-4608(00)00318-6. 2001                                                                     |
| 1 | RC21-42        | 12 y        | M | mat           | > 20 y (mat)      | 46,XY,r(21)[96]/45,XY,-21[4]<br>mat: 46,XX,der(21)                                            | 12116206                                                                            | Ring chromosome 21 in a boy and a derivative chromosome 21 in the mother: implication for ring chromosome formation                                                                                                       | Muroya K, Yamamoto K, Fukushima Y, Ogata T. Am J Med Genet. 2002 Jul 15;110(4):332-7. doi: 10.1002/ajmg.10466. 2002                                                                                       |
| 1 | RC21-43        | nb          | F | de novo       |                   | 46,XX,r(21)[p11.2q22.3][0.86]/45,XX,-21[0.14]                                                 | 14673898                                                                            | Dystonia in a patient with ring chromosome 21                                                                                                                                                                             | Hou CE, Schlaggar BL, Racette BA. Mov Disord. 2003 Dec;18(12):1547-9. doi: 10.1002/mds.10621. 2003                                                                                                        |
| 1 | RC21-44        | nb          | F | de novo       |                   | AC/PB: 46,XX,1ps,r921)[p11.2q22.3][48/50]                                                     | 12838556                                                                            | Ring 21 chromosome and a satellited 1p in the same patient: novel origin for an ectopic NOR                                                                                                                               | Ki A, Rauen KA, Black LD, Kostiner DR, Sandberg PL, Pinkel D, Albertson DG. Am J Med Genet A. 2003 Jul 30;120A(3):365-9. doi: 2003                                                                        |
| 1 | RC21-45        | 9 m         | M | de novo       |                   | 46,XY,r(21)                                                                                   | 15372526                                                                            | Dilated ascending aorta in a child with ring chromosome 21 syndrome                                                                                                                                                       | Rope AF, Hinton RB, Spicer RL, Blough-Pfau R, Saal HM. Am J Med Genet A. 2004 Oct 1;130A(2):191-5. doi: 10.1002/ajmg.a.30143. 2004                                                                        |
| 1 | RC21-46        |             |   |               |                   |                                                                                               | 15033121                                                                            | [Chromosome 21 ring (r21) and epilepsy]                                                                                                                                                                                   | Pardal Fernández JM, Jerez García P, Carrascosa Romero MC, Marco Giner J. An Pediatr (Barc). 2004 Apr;60(4):379-81. doi: 2004                                                                             |
| 1 | RC21-47        | 2 y         | M | de novo       |                   | 46,XY,r(21)[91]/46,XY,r(21;21)[5]/45,XY,-21[4]                                                | 16331572                                                                            | [Cytogenetic analysis and phenotype location analysis on the karyotype of a ring chromosome                                                                                                                               | Zhu XY, Zhao R, Ye ZC, Peng YG, Tan YQ. Zhonghua Yi Xue Yi Chuan Xue Za Zhi. 2005 Dec;22(6):682-3. 2005                                                                                                   |
| 1 | RC21-48        | nb          | F | de novo       |                   | 46,XX,r(21)                                                                                   | 16155419                                                                            | Duplication of the Down syndrome critical region does not predict facial phenotype in a baby with a ring chromosome 21                                                                                                    | Crombez EA, Dipple KM, Schimmenti LA, Rao N. Clin Dysmorphol. 2005 Oct;14(4):183-7. doi: 10.1097/00019605-200510000-00003. 2005                                                                           |
| 1 | RC21-49        | 14 y        | M |               |                   | 46,XY,r(21)                                                                                   | 18970914                                                                            | Videoendoscopic rehabilitation of iatrogenous Stensen-duct-acquired atresia in a patient with ring chromosome 21 syndrome and drooling                                                                                    | Capaccio P, Clemente IA, Marchisio P, Selicorni A, Esposito S, Pignataro L. J Pediatr Surg. 2008 Nov;43(11):e17-20. doi: 10.1016/j.jpedsurg.2008.06.042. 2008                                             |
| 1 | RC21-50        | 31 y        | F | mat           | > 31 y            | 46,XX,r(21)[0.94]/45,XX,-21[0.04]<br>mat: 46,XX,r(21)[0.98]/45,XX,-21[0.02]                   | 18371955                                                                            | Ring chromosome 21 and reproductive pattern: a familial case and review of the literature                                                                                                                                 | Bertini V, Valetto A, Uccelli A, Tarantino E, Simi P. Fertil Steril. 2008 Nov;90(5):2004.e1-5. doi: 10.1016/j.fertnstert.2008.01.087. Epub 2008 Apr 18. 2008                                              |
| 1 | RC21-51        | 3 m         | M |               |                   | 46,XY,der(21;21)[q10;q10][141]/46,XY,r(21)(p11q22)[15]                                        | 19778489                                                                            | Rare chromosomal complement of trisomy 21 in a boy conceived by IVF and cryopreservation                                                                                                                                  | Quiroga R, Roselló M, Martínez F, Ferrer-Bolufer I, Monfort S, Ultra S, Hernandez MC, Orellana C. Reprod Biomed Online. 2009 Sep;19(3):415-7. doi: 10.1016/s1472-6483(10)60177-0. 2009                    |
| 1 | RC21-52        | > 20 y      | M |               | > 20 y            | 46,XY,r(21)[95]/45,XY,-21[3]/46,XY[2]                                                         | 19135661                                                                            | Sperm chromosome analysis of an infertile patient with a 95% mosaic r(21) karyotype and normal phenotype                                                                                                                  | Hammoud I, Gomes DM, Bergere M, Wainer R, Selva J, Vialard F. Fertil Steril. 2009 Mar;91(3):930.e13-5. doi: 10.1016/j.fertnstert.2008.12.005. Epub 2009 Jan 10. 2009                                      |
| 1 | RC21-53        | 7 m         | M | de novo       |                   | 46,XY,r(21)                                                                                   | 19864007                                                                            | ITGB2 mutation combined with deleted ring 21 chromosome in a child with leukocyte adhesion deficiency                                                                                                                     | Fiorini M, Piovani G, Schumacher RF, Magri C, Bertini V, Mazzolari E, Notarangelo L, Notarangelo LD, Barlati. J Allergy Clin Immunol. 2009 Dec;124(6):1356-8. doi: 10.1016/j.jaci.2009.07.058. 2009       |
| 1 | RC21-54        | 3 y         | F |               | > 30 y            | 46,XX,r(21)[p11q22.3]                                                                         | 25385124                                                                            | An adult female patient with ring chromosome 21: behavioural phenotype and results of high-resolution molecular characterisation                                                                                          | Verhoeven WM, Van Bon B, Egger JJ, Hoischen A, Doelman JC. Acta Neuropsychiatr. 2010 Aug;22(4):188-94. doi: 10.1111/j.1601-5215.2010.00455.x. 2010                                                        |
| 1 | RC21-55        | pn, 21 gwks | M | pat           | CTB               | 46,XY,r(21)[p11.2q22][34]/45,XY,-21[4]/46,XY[14] pat:<br>46,XY,r(21)[1]/46,XY[99]             | 20509162                                                                            | A fetus with ring chromosome 21 characterized by aCGH shows no clinical findings after birth                                                                                                                              | Papoulidis I, Manolakos E, Siomou E, Kefalas K, Thomaidis L, Liehr T, Vetro A, Athanasiadis A, Zuffardi O, Petersen. Prenat Diagn. 2010 Jun;30(6):586-8. doi: 10.1002/pd.2524. 2010                       |
| 1 | RC21-56        | pn, 15 gwks | F | mat           | CTB, > 40 y (mat) | 46,XX,r(21)[p11.2q22.3<br>mat: 46,XX,r(21)[p11.2q22.3][15]/46,XX[35]                          | 23074672                                                                            | Inheritance of a Ring Chromosome 21 in a Couple Undergoing In Vitro Fertilization (IVF): A Case Report                                                                                                                    | Mazzaschi RL, Love DR, Hayes I, George A. Case Rep Genet. 2011;2011:158086. doi: 10.1155/2011/158086. Epub 2011 Jul 31. 2011                                                                              |
| 1 | RC21-57        | 3 y         | M |               |                   | 46,XY,r(21)[p13q22.3][17]/45,XY,-21[3]                                                        | 21595005                                                                            | Ring 21 chromosome presenting with epilepsy and intellectual disability: clinical report and review of the literature                                                                                                     | Specchio N, Carotenuto A, Trivisano M, Cappelletti S, Digilio C, Capolino R, Di Capua M, Fusco L, Vigevano F. Am J Med Genet A. 2011 Apr;155A(4):911-4. doi: 10.1002/ajmg.a.33899. Epub 2011 Mar 15. 2011 |
| 1 | RC21-58        |             |   |               |                   |                                                                                               | 23178995                                                                            | Agminated lentiginosis in a patient with ring chromosome 21                                                                                                                                                               | 23178995 Eur J Dermatol. 2012 Nov-Dec;22(6):801-3. doi: 10.1684/ejd.2012.1866. 2012                                                                                                                       |
| 1 | RC21-59        | pn, 22 gwks | M | de novo       | top               | 46,XY,r(21)[88]/45,XY,-21[9]/46,XY,idelic r(21)[3]                                            | 22482972                                                                            | Mosaic ring chromosome 21, monosomy 21, and isodicentric ring chromosome 21: prenatal diagnosis, molecular cytogenetic characterization, and association with 2-Mb deletion of 21q21.1-q21.2 and 5-Mb deletion of 21q22.3 | Chen CP, Lin YH, Chou SY, Su YN, Chern SR, Chen YT, Town DD, Chen WL, Wang W. Taiwan J Obstet Gynecol. 2012 Mar;51(1):71-6. doi: 10.1016/j.tjog.2012.01.014. 2012                                         |

|   |                |             |   |         |          |                                                                                         |          |                                                                                                                                   |                                                                                                                                                                                                                             |                                                                                                      |      |
|---|----------------|-------------|---|---------|----------|-----------------------------------------------------------------------------------------|----------|-----------------------------------------------------------------------------------------------------------------------------------|-----------------------------------------------------------------------------------------------------------------------------------------------------------------------------------------------------------------------------|------------------------------------------------------------------------------------------------------|------|
| 1 | RC21-60 case 1 | 1 y         | F | de novo |          | 46,XX,r(21)[97]/45,XX,-21[3]                                                            | 22398511 | Unique genomic structure and distinct mitotic behavior of ring chromosome 21 in two unrelated cases                               | Zhang HZ, Xu F, Seashore M, Li P.                                                                                                                                                                                           | Cytogenet Genome Res. 2012;136(3):180-7. doi: 10.1159/000336978. Epub 2012 Mar 7.                    | 2012 |
| 1 | RC21-60 case 2 | 1 y         | M | de novo |          | 46,XY,r(21)[87]/45,XY,-21[13]                                                           | 22398511 |                                                                                                                                   |                                                                                                                                                                                                                             |                                                                                                      |      |
| 1 | RC21-61        | 1 y         | M | de novo |          | 46,XY,r(21)                                                                             | 22209335 | Ring chromosome 21 in the differential diagnosis of waddling gait                                                                 | Arslan M, Yiş U, Vurucu S, Tunca Y, Unay B, Akin R.                                                                                                                                                                         | Brain Dev. 2012 Oct;34(9):792-5. doi: 10.1016/j.braindev.2011.12.003. Epub 2011 Dec 29.              | 2012 |
| 1 | RC21-62        | 3 y         | M | de novo |          | 47,XY,+21[0.28]/47,XY,+r(21)[0.04]/46,XY[0.68]                                          | 23000017 | Mosaicism for trisomy 21 and ring (21) in a male born to normal parents: a case report                                            | Samarth RM, Gandhi P, Pandey H, Maudar KK.                                                                                                                                                                                  | Gene. 2012 Dec 10;511(1):109-12. doi: 10.1016/j.gene.2012.09.035. Epub 2012 Sep 20.                  | 2012 |
| 1 | RC21-[1]       | 2 m         | M | de novo | d. 3 m   | 46,XY,r(21)                                                                             | 24052730 | Ring autosomes: some unexpected findings                                                                                          | Caba L, Rusu C, Plăiaşu 5th, Gug G, Grămescu M, Bujoran C, Ochiană D, Voloşciuc M, Popescu R, Braha E.                                                                                                                      | Balkan J Med Genet. 2012 Dec;15(2):35-46. doi: 10.2478/bjmg-2013-0005.                               | 2012 |
| 0 | RC21-63        |             |   |         |          |                                                                                         | 23545316 | Ring chromosome 21 presenting with sacrococcygeal teratoma: prenatal diagnosis, molecular cytogenetic characterization and        | Chen CP, Cheng PJ, Chang SD, Lee YX, Shih JC, Chern SR, Wu PS, Su JW, Chen YT, Hsieh AH, Chen TH, Chen LF, Wang Burgess T, Downie L, Pertile MD, Francis D, Glass M, Nouri S, Psczola R.                                    | Gene. 2013 Jun 10;522(1):111-6. doi: 10.1016/j.gene.2013.03.064. Epub 2013 Mar 29.                   | 2013 |
| 1 | RC21-64        | nb          | F |         | d. 4.5 m | 46,XX,r(21)[p11q22][42]/45,XX,-21[8]                                                    | 24649383 | Monosomy 21 seen in live born is unlikely to represent true monosomy 21: a case report and review of the literature               |                                                                                                                                                                                                                             | Case Rep Genet. 2014;2014:965401. doi: 10.1155/2014/965401. Epub 2014 Feb 4.                         | 2014 |
| 1 | RC21-65        | 30 y        | F |         | > 30 y   | 46,XX,r(21)[166]/46,XX,der(21)[60]/45,XX,-21[20]                                        | 25449084 | [Analysis of a infertile female with ring 21 chromosome using combined techniques]                                                | Wang H, Wang Y, Wu L, Xie L.                                                                                                                                                                                                | Zhonghua Yi Xue Yi Chuan Xue Za Zhi. 2014 Dec;31(6):761-4. doi: 10.1111/and.12232. Epub 2014 Jan 28. | 2014 |
| 1 | RC21-66        | 33 y        | M |         |          | 46,XY,r(21)[p13q22.3][44]/46,XY,dic r(21)[4]/45,XY,-21[52], FISH: r(21)[0.75]/-21[0.25] | 24471893 | Ring chromosome 21 and monosomy 21 mosaicism in a patient with azoospermia                                                        | Cetin Z, Altioğ-Clark O, Sevuk M, Berker Karauzum S.                                                                                                                                                                        | Andrologia. 2015 Feb;47(1):112-5. doi: 10.1111/and.12232. Epub 2014 Jan 28.                          | 2015 |
| 1 | RC21-67        | 4 y         | F |         |          | PB: 46,XX,r(21)[p11.2q22.3]c, BM: 46,XX,r(21)c[11]/47,idem,+r(21)[3]                    | 26947932 | RUNX1 amplification in AML with myelodysplasia-related changes and ring 21 chromosomes                                            | Burillo-Sanz S, Vargas MT, Morales-Camacho RM, Caballero-Velázquez T, Sánchez J, García-Lozano JR, Pérez de Norman M, Wainstein B, Anazodo A, Turner A, Ma C, Payne K, Tangye SG, Lafabregue E, Chaby G, Vabres P, Carmi E. | Hematol Oncol. 2017 Dec;35(4):894-899. doi: 10.1002/hon.2287. Epub 2016 Mar 7.                       | 2017 |
| 1 | RC21-68        | 5 y         | F |         |          | 46,XX,r(21)[q11.2q22.3]/45,XX,-21, FISH r(21)[0.35]/-21[0.65]                           | 29656336 | Combined Immunodeficiency with Ring Chromosome 21                                                                                 | Norman M, Wainstein B, Anazodo A, Turner A, Ma C, Payne K, Tangye SG, Lafabregue E, Chaby G, Vabres P, Carmi E.                                                                                                             | J Clin Immunol. 2018 Apr;38(3):251-256. doi: 10.1007/s10875-018-0493-9. Epub 2018 Mar 7.             | 2018 |
| 1 | RC21-69        | 2 y         | M |         |          | 46,XY,r(21)                                                                             | 30922549 | [Alopecia, deformed ear and mental retardation associated with terminal 21q deletion]                                             |                                                                                                                                                                                                                             | Ann Dermatol Venereol. 2019 Sep;146(8-9):563-570. doi: 10.1007/s10875-018-0493-9. Epub 2019 Jun 14.  | 2019 |
| 1 | RC21-70        | 18 y        | F | de novo | > 18 y   | 46,XX,der(21)t(21;21)[92]/45,XX,der(21),-21                                             | 31195399 | Unexpected Coexistence of a Derivative t(21;21) and Complementary Mosaic r(21) in a Female with Multiple Miscarriages             | Onur Cura D, Bora E, Ozkalayci H, Kirbiyik O, Kutbay YB, Ercal D, Cankaya T.                                                                                                                                                | Cytogenet Genome Res. 2019;158(2):83-87. doi: 10.1159/000500986. Epub 2019 Jun 14.                   | 2019 |
| 1 | RC21-71        | 12 y        | F |         |          | 46,XX,r(21)[0.60]/45,XX,-21[0.40]                                                       | 30800047 | Thrombocytopenia and Predisposition to Acute Myeloid Leukemia due to Mosaic Ring 21 with Loss of RUNX1: Cytogenetic and Molecular | Vormittag-Nocito E, Ni H, Schmidt ML, Lindgren V.                                                                                                                                                                           | Mol Syndromol. 2019 Jan;9(6):306-311. doi: 10.1159/000494645. Epub 2018 Nov 9.                       | 2019 |
| 1 | RC21-72        | 10.5 y      | M |         |          | 46,XY,r(21)                                                                             | 32663882 | A Revisited Diagnosis of Collagen VI Related Muscular Dystrophy in a Patient with a Novel COL6A2 Variant and 21q22.3 Deletion     | Simsek-Kiper PO, Oguz S, Ergen FB, Utine GE, Alikasifoglu M, Haliloglu G.                                                                                                                                                   | Neuropediatrics. 2020 Dec;51(6):445-449. doi: 10.1055/s-0040-1714125. Epub 2020 Jul 14.              | 2020 |
| 1 | RC21-73        | pn, 18 gwks | F | de novo | top      | 46,XX,r(21)[p11.2q22.3]                                                                 | 33494993 | Prenatal diagnosis and molecular cytogenetic characterization of a pure ring chromosome 21 with a 4.657-Mb 21q22.3 deletion       | Chen CP, Wang LK, Chern SR, Wu PS, Chen SW, Wu FT, Chen YY, Town DD, Wang W.                                                                                                                                                | Taiwan J Obstet Gynecol. 2021 Jan;60(1):157-160. doi: 10.1016/j.tjog.2020.11.024.                    | 2021 |

72 74

|   |             |       |   |         |        |                                                          |         |                                                                     |                                                    |                                                                                         |      |
|---|-------------|-------|---|---------|--------|----------------------------------------------------------|---------|---------------------------------------------------------------------|----------------------------------------------------|-----------------------------------------------------------------------------------------|------|
| 1 | RC22-1      | 5.5 y | F | de novo |        | Twin: 46,XX,r(22)                                        | 4697858 | Monozygotic twins with ring chromosome 22                           | Lindenbaum RH, Bobrow M, Barber L.                 | J Med Genet. 1973 Mar;10(1):85-9. doi: 10.1136/jmg.10.1.85.                             | 1973 |
| 1 | RC22-2      | 5 y   | F |         | > 38 y | 46,XX,r(22)                                              | 1214291 | A profoundly mentally handicapped woman with a ring chromosome 22   | Veall RM, Rundle AT, Chitham RC, Saldana-Garcia P. | J Ment Defic Res. 1975 Sep-Dec;19(3-4):225-43. doi: 10.1111/j.1365-2788.1975.tb01275.x. | 1975 |
| 1 | RC22-3      | 18 y  | F |         | > 18 y | 46,XX,r(22)                                              | 940150  | A note on a patient with a ring-22 chromosome identified by banding | Stewart A, Richards BW.                            | J Ment Defic Res. 1976 Jun;20(2):95-8. doi: 10.1111/j.1365-2788.1976.tb00933.x.         | 1976 |
| 1 | RC22-4 pt1  | 3 y   | F | de novo |        | PB: 46,XX,r(22)[100/100/47, 1968/71/76], SF: r(22)[0.91] | 912941  | Phenotypic correlations in patients with ring chromosome 22         | Hunter AG, Ray M, Wang HS, Thompson DR.            | Clin Genet. 1977 Oct;12(4):239-49. doi: 10.1111/j.1399-0004.1977.tb00933.x.             | 1977 |
| 1 | RC22-4 pt2  | 36 y  | F |         | > 41 y | PB/SF: 46,XX,r(22)[15/15; 16/30]                         | 912941  |                                                                     |                                                    |                                                                                         |      |
| 1 | RC22-5 pt 1 | 4 y   | F | de novo |        | 46,XX,r(22)                                              | 519902  | Phenotypic variation in two patients with a ring chromosome 22      | Funderburk SJ, Sparkes RS, Klisak I.               | Clin Genet. 1979 Nov;16(5):305-10. doi: 10.1111/j.1399-0004.1979.tb01007.x.             | 1979 |
| 1 | RC22-5 pt 2 | 1 m   | F |         |        | 46,XX,r(22)                                              | 519902  |                                                                     |                                                    |                                                                                         |      |

|   |               |       |   |         |              |                                                                            |          |                                                                                                                                                                        |                                                                                                                                              |                                                                                              |
|---|---------------|-------|---|---------|--------------|----------------------------------------------------------------------------|----------|------------------------------------------------------------------------------------------------------------------------------------------------------------------------|----------------------------------------------------------------------------------------------------------------------------------------------|----------------------------------------------------------------------------------------------|
| 1 | RC22-6        | 2 m   | M | mat     | > 21 y (mat) | 46,XY,r(22)/45,XY,-22<br>mat:<br>46,XX,r(22)/45,XY,t(15;22)(p11;q11)/46,XX | 437787   | Ring chromosome 22 in a mentally retarded child and mosaic 45,XX,-15,-22,+t(15;22)(p11;q11)/46,XX,r(22)/46,XX karyotype in the mother                                  | Fryns JP, Van den Berghe H.                                                                                                                  | Hum Genet. 1979 Mar 12;47(2):213-1979<br>6. doi: 10.1007/BF00273205.                         |
| 0 | RC22-7        |       |   |         |              |                                                                            | 7150788  | [Ring chromosome 22: r(22)]                                                                                                                                            | Teysier M, Moreau N.                                                                                                                         | Bull Assoc Anat (Nancy). 1982 1982                                                           |
| 1 | RC22-8        | 28 y  | M |         | > 28 y       | 46,XY,r(22)                                                                | 3966887  | Methylphenidate therapy for aggression in a man with ring 22 chromosome. Report and literature review                                                                  | Reeve A, Shulman SA, Zimmerman AW, Cassidy SB.                                                                                               | Arch Neurol. 1985 Jan;42(1):69-72. 1985<br>doi:<br>10.1001/archneur.1985.04060010075019.     |
| 1 | RC22-9        | 1.5 y | M |         | d. 27 y      | 46,XY,r(22)(p12q13.3)                                                      | 3712397  | Multifocal meningiomas in a patient with a constitutional ring chromosome 22                                                                                           | Arinami T, Kondo I, Hamaguchi H, Nakajima S.                                                                                                 | J Med Genet. 1986 Apr;23(2):178-1986<br>80. doi: 10.1136/jmg.23.2.178.                       |
| 1 | RC22-10       | 9 y   | M | de novo |              | 46,XY,r(22)(p11q13)[24]/46,XY,dic r(3)/46,XY,del(22)(p12)(q13)[40]         | 2872982  | Deleted ring chromosome 22 in a mentally retarded boy                                                                                                                  | Gustavson KH, Arancibia W, Eriksson U, Svennerholm L.                                                                                        | Clin Genet. 1986 Apr;29(4):337-41. 1986<br>doi: 10.1111/j.1399-0004.1986.tb01264.x.          |
| 1 | RC22-11 pt PM | 11 y  | M |         |              | 46,XY,r(21)                                                                | 3652494  | Chromosome studies in IgA-deficient patients                                                                                                                           | Taalman RD, Weemaes CM, Hustinx TW, Scheres JM, Clement JM, Stoelenga Pizzi E, de la Pierre L, Gargantini G, Andreoli A, Rogari P, Bonora G, | Clin Genet. 1987 Aug;32(2):81-7. 1987<br>doi: 10.1111/j.1399-0004.1987.tb01264.x.            |
| 1 | RC22-12       |       |   |         |              |                                                                            | 3627062  | [Ring chromosome 22. Description of a clinical case]                                                                                                                   | Lassen C, Mettrey R, Berthier M, Bonneau D, Gremmo G, Hoppeler A.                                                                            | Ann Pediatr (Paris). 1987 1987<br>Jun;34(6):451-2.                                           |
| 1 | RC22-13       |       |   |         |              |                                                                            | 3619316  | [Ring chromosome 22 associated with right polycystic kidney and a left junction syndrome]                                                                              |                                                                                                                                              |                                                                                              |
| 1 | RC22-14       | 5 y   | M |         | > 40 y       | PB/SF: 46,XY,r(22)                                                         | 3100017  | Neurofibromatosis in a man with a ring 22: in situ hybridization studies                                                                                               | Duncan AM, Partington MW, Soudek D.                                                                                                          | Cancer Genet Cytogenet. 1987 1987<br>Mar;25(1):169-74. doi:<br>10.1016/0165-4608(87)90173-7. |
| 1 | RC22-15       | 3 y   | F | de novo |              | 46,XX,r(22)(p11.2q13.3)                                                    | 3180509  | Ring chromosome 22 46,XX,r(22)(p11.2---q13.3) presenting with leukemoid reaction                                                                                       | Watanabe H, Yamanaka T.                                                                                                                      | Clin Genet. 1988 Sep;34(3):206-7. 1988<br>doi: 10.1111/j.1399-0004.1988.tb02865.x.           |
| 1 | RC22-16       | 2 y   | F | de novo |              | 46,XX,r(22)(p13q13.3)                                                      | 2455825  | Determination of the breakpoints and the parental origin of a ring 22 chromosome: an analysis by high-resolution banding technique, quinacrine and silver stainings    | Naritomi K, Hirayama K.                                                                                                                      | Jinrui Idengaku Zasshi. 1988 1988<br>Mar;33(1):67-73. doi:<br>10.1007/BF01891242.            |
| 1 | RC22-17       | nb    | M |         |              | 46,XY,r(22)(p13q13.3)                                                      | 2260575  | Ring chromosome 22 karyotype in a patient with Opitz (BBBG) syndrome                                                                                                   | Christodoulou J, Bankier A, Loughnan P.                                                                                                      | Am J Med Genet. 1990 1990<br>Nov;37(3):422-4. doi:<br>10.1002/ajmg.1320370324.               |
| 1 | RC22-18       | 3 y   | F |         |              | 46,XX,r(20)                                                                | 1721941  | Ring chromosome 22: a case report                                                                                                                                      | Severien C, Felix S, Bartholomé K.                                                                                                           | Klin Padiatr. 1991 Nov-Dec;203(6):467-9. doi: 10.1055/s-2007-1025476.                        |
| 1 | RC22-19       |       |   |         |              |                                                                            | 1772175  | [Ring chromosome 22. Description of a new case (1)]                                                                                                                    | Gil Benso R, López Ginés C, Gregori Romero M, Galán Sánchez F, Pellin Tommerup N, Warburg M, Gieselmann V, Hansen BR, Koch J, Petersen GB,   | An Esp Pediatr. 1991 Jul;35(1):62-4. 1991                                                    |
| 1 | RC22-20       | 3 y   | M | pat     | > 25 y       | PB/SF: mos 46,XX,r(22)                                                     | 1424240  | Ring chromosome 22 and neurofibromatosis                                                                                                                               | Petrella R, Levine S, Wilmot PL, Ashar KD, Casamassima AC, Shapiro LR.                                                                       | Clin Genet. 1992 Oct;42(4):171-7. 1992<br>doi: 10.1111/j.1399-0004.1992.tb00902.x.           |
| 1 | RC22-21       | 15 y  | M |         |              | 46,XY,r(22)(p11q13)                                                        | 8213904  | Multiple meningiomas in a patient with constitutional ring chromosome 22                                                                                               | Woods CG, Bankier A, Curry J, et al                                                                                                          | Am J Med Genet. 1993 Aug 15;47(2):184-6. doi:<br>10.1002/ajmg.1320370324.                    |
| 1 | RC22-21.5     | 3 y   | M | de novo |              | 46,XY,r(22)                                                                | 7815438  | Asymmetry and skin pigmentary anomalies in chromosome mosaicism                                                                                                        |                                                                                                                                              | J Med Genet 1994, 31:694-701 1994                                                            |
| 1 | RC22-22       | 1 y   | F |         |              | 46,XX,r(22)                                                                | 8558556  | Metachromatic leucodystrophy (MLD) in a patient with a constitutional ring chromosome 22                                                                               | Coulter-Mackie MB, Rip J, Ludman MD, Beis J, Cole DE.                                                                                        | J Med Genet. 1995 Oct;32(10):787-1995<br>91. doi: 10.1136/jmg.32.10.787.                     |
| 1 | RC22-23       | 21 y  | M |         | > 21 y       | 46,XY,r(22)                                                                | 8930062  | Ring chromosome 22 and mood disorders                                                                                                                                  | Sovner R, Stone A, Fox C.                                                                                                                    | J Intellect Disabil Res. 1996 Feb;40 ( Pt 1):82-6. doi: 10.1111/j.1365-2788.1996.tb00607.x.  |
| 1 | RC22-24       | 4 y   | F |         | > 38 y       | 46,XX,r(22)/45,XX,-22                                                      | 9225971  | Mutational analysis and expression studies of the neurofibromatosis type 2 (NF2) gene in a patient with a ring chromosome 22 and NF2                                   | Kehrer-Sawatzki H, Udart M, Krone W, Baden R, Fahsold R, Thomas G, Schmucker B, Assum G.                                                     | Hum Genet. 1997 Jul;100(1):67-74. 1997<br>doi: 10.1007/s004390050467.                        |
| 1 | RC22-25       | 4 y   | F |         |              | 46,XX,r(22)                                                                | 9217983  | March 1997-4 year old girl with ring chromosome 22 and brain tumor                                                                                                     | Rubio A.                                                                                                                                     | Brain Pathol. 1997 Jul;7(3):1027-8. 1997<br>doi: 10.1111/j.1750-3639.1997.tb00902.x.         |
| 1 | RC22-26       |       |   |         |              |                                                                            | 10487083 | Ring chromosome 22 resulting in partial monosomy in a mentally retarded boy                                                                                            | Gibbons B, Tan SY, Tam PY.                                                                                                                   | Singapore Med J. 1999 1999<br>Apr;40(4):273-5.                                               |
| 1 | RC22-27       | nb    | F | de novo |              | 46,XX,r(22)(p12q13)[46]/46,XX,dic r[4]                                     | 10204853 | Ring 22 duplication/deletion mosaicism: clinical, cytogenetic, and molecular characterisation                                                                          | Frizzley JK, Stephan MJ, Lamb AN, Jonas PP, Hinson RM, Moffitt DR, MacLean JE, Teshima IE, Sztamari P,                                       | J Med Genet. 1999 Mar;36(3):237-1999<br>41.                                                  |
| 1 | RC22-28       | 6 m   | M |         |              | 46,XY,r(22)                                                                | 10706359 | Ring chromosome 22 and autism: report and                                                                                                                              | De Mas P, Chassaing N, Chaix Y, Vincent MC, Julia S, Bourrouillou G, Calvas P, Bieth E.                                                      | Am J Med Genet. 2000 Feb 2000                                                                |
| 1 | RC22-29       | 7 y   | M | de novo |              | 46,XY,r(22)                                                                | 11950869 | Molecular characterisation of a ring chromosome 22 in a patient with severe language delay: a contribution to the refinement of the subtelomeric 22q deletion syndrome |                                                                                                                                              | J Med Genet. 2002 Apr;39(4):e17. 2002<br>doi: 10.1136/jmg.39.4.e17.                          |

|   |               |             |   |                |              |                                                                                 |          |                                                                                                                                                                                            |                                                                                                                                                                                |                                                                                           |      |
|---|---------------|-------------|---|----------------|--------------|---------------------------------------------------------------------------------|----------|--------------------------------------------------------------------------------------------------------------------------------------------------------------------------------------------|--------------------------------------------------------------------------------------------------------------------------------------------------------------------------------|-------------------------------------------------------------------------------------------|------|
| 1 | RC22-30 subj1 | 5.5 y       | M | de novo        |              | 46,XY,r(22)(p11.2q13)                                                           | 12752574 | Five new subjects with ring chromosome 22                                                                                                                                                  | Ishmael HA, Cataldi D, Begleiter ML, Pasztor LM, Dasouki MJ, Butler MG.                                                                                                        | Clin Genet. 2003 May;63(5):410-4. doi: 10.1034/j.1399-0004.2003.00064.x.                  | 2003 |
| 1 | RC22-30 subj2 | 35 y        | M |                | > 35 y       | 46,XY,r(22)(p11.2q13)                                                           | 12752574 |                                                                                                                                                                                            |                                                                                                                                                                                |                                                                                           |      |
| 1 | RC22-30 subj3 | 7 y         | F |                |              | 46,XX,r(22)                                                                     | 12752574 |                                                                                                                                                                                            |                                                                                                                                                                                |                                                                                           |      |
| 1 | RC22-30 subj4 | 8 y         | M |                |              | 46,XY,r(22)                                                                     | 12752574 |                                                                                                                                                                                            |                                                                                                                                                                                |                                                                                           |      |
| 1 | RC22-30 subj5 | 16 y        | M |                |              | 46,XY,r(22)(p12q13)                                                             | 12752574 |                                                                                                                                                                                            |                                                                                                                                                                                |                                                                                           |      |
| 1 | RC22-31       | pn          | F | de novo        | top          | 46,XX,r(22)(p13q13.31)                                                          | 12533811 | Prenatal diagnosis of mosaic ring chromosome 22 associated with cardiovascular abnormalities and intrauterine growth restriction                                                           | Chen CP, Chern SR, Chang TY, Lee CC, Chen LF, Tzen CY, Wang W, Lin CJ, Yang BP, Yang LS.                                                                                       | Prenat Diagn. 2003 Jan;23(1):40-3. doi: 10.1002/pd.517.                                   | 2003 |
| 1 | RC22-32       | 3 y         | M | de novo        |              | 46,XY,r(22)                                                                     | 15372517 | Characterization of the phenotype and definition of the deletion in a new patient with ring chromosome 22                                                                                  | Battini R, Battaglia A, Bertini V, Cioni G, Parrini B, Rapalini E, Simi P, Tinelli F, Valetto A.                                                                               | Am J Med Genet A. 2004 Oct 1;130A(2):196-9. doi: 10.1002/ajmg.a.30276.                    | 2004 |
| 1 | RC22-33       | pn, 16 gwks | M | de novo        | top          | 46,XX,r(22)                                                                     | 15305353 | A case of ring chromosome 22 with deletion of the 22q13.3 region associated with agenesis of the corpus callosum, fornix and septum pellucidum                                             | Delcán J, Orera M, Linares R, Saavedra D, Palomar A.                                                                                                                           | Prenat Diagn. 2004 Aug;24(8):635-7. doi: 10.1002/pd.955.                                  | 2004 |
| 0 | RC22-34       |             |   |                |              |                                                                                 | 16059935 | Molecular and phenotypic characterization of ring chromosome 22                                                                                                                            | Jeffries AR, Curran S, Elmslie F, Sharma A, Wenger S, Hummel M, Powell J.                                                                                                      | Am J Med Genet A. 2005 Aug 30;137(2):139-47. doi: 10.1002/ajmg.a.30276.                   | 2005 |
| 1 | RC22-35       | pn, 12 gwks | F | mat            | top, 22 gwks | 46,XX,der(22)r(22)(p11.2q11.2)inv(22)(q11.2q11.3) mat:46,XX,inv(22)(q11.2q13.3) | 17099929 | Prenatal diagnosis of an unexpected interstitial 22q11.2 deletion causing truncus arteriosus and thymic hypoplasia in a ring 22 chromosome derived from a maternally inherited paracentric | McClarren J, Donnerfeld AE, Ravnán JB.                                                                                                                                         | Prenat Diagn. 2006 Dec;26(13):1212-5. doi: 10.1002/pd.1590.                               | 2006 |
| 0 | RC22-36       |             |   |                |              |                                                                                 | 18664089 | A case with a ring chromosome 22                                                                                                                                                           | Koç A, Karaer K, Ergün MA, Yirmibeş-Karaoğuz M, Kan D, Cansu A, Perçin F.                                                                                                      | Turk J Pediatr. 2008 Mar-Apr;50(2):193-6.                                                 | 2008 |
| 1 | RC22-37       | pn          | F | de novo        | top          | 46,XX,r(22)(p11q13.2)[63]/45,XX,-22[3]/46,XX,idelic r[2]                        | 20149051 | Prenatal diagnosis of mosaic ring 22 duplication/deletion with terminal 22q13 deletion due to abnormal first trimester screening and choroid plexus cyst detected on ultrasound            | Koç A, Arisoy O, Pala E, Erdem M, Kaymak AO, Erkal O, Karaoğuz MY.                                                                                                             | J Obstet Gynaecol Res. 2009 Oct;35(5):978-82. doi: 10.1111/j.1447-0756.2009.01040.x.      | 2009 |
| 1 | RC22-38       | 2 y         | F |                |              | 46,XX,r(22)                                                                     | 19772601 | Pathogenesis of vestibular schwannoma in ring chromosome 22                                                                                                                                | Denayer E, Brems H, de Cock P, Evans GD, Van Calenberg F, Bowers N, Sciot R, Debiec-Rychter M, Vermeesch JV, Mantzouratou A, Mania A, Apergi M, Laver S, Serhal P, Delhanty J. | BMC Med Genet. 2009 Sep 22;10:97. doi: 10.1186/1471-2350-10-97.                           | 2009 |
| 0 | RC22-39       |             |   |                |              |                                                                                 | 19166580 | Meiotic and mitotic behaviour of a ring/deleted chromosome 22 in human embryos determined by preimplantation genetic diagnosis for a maternal carrier                                      | Laver S, Serhal P, Delhanty J.                                                                                                                                                 | Mol Cytogenet. 2009 Jan 23;2:3. doi: 10.1186/1755-8166-2-3.                               | 2009 |
| 1 | RC22-40       | 31 y        | M |                | > 31 y       | 46,XY,r(22)[93]/45,XY,-22[7]                                                    | 20709628 | Azoospermia in a man with a constitutional ring 22 chromosome                                                                                                                              | Zuccarello D, Dallapiccola B, Novelli A, Foresta C.                                                                                                                            | Eur J Med Genet. 2010 Nov-Dec;53(6):389-91. doi: 10.1007/s10046-010-0971-6866.69372.      | 2010 |
| 1 | RC22-41       | 3 y         | F | de novo        |              | 46,XX,r(22)(p11.2q13)                                                           | 21031059 | Phenotypic correlations in a patient with ring chromosome 22                                                                                                                               | Demirhan O, Tunç E.                                                                                                                                                            | Indian J Hum Genet. 2010 May;16(2):97-9. doi: 10.4103/0971-6866.69372.                    | 2010 |
| 1 | RC22-42 pt11  | 9 y         | M |                |              | 46,XY,r(22)                                                                     | 20186804 | 22q13.3 deletion syndrome: clinical and molecular analysis using array CGH                                                                                                                 | Dhar SU, del Gaudio D, German JR, Peters SU, Ou Z, Bader PI, Berg JS, Blazo M, Brown CW, Graham BH, Grebe TA, Lalani S, Irons M, Sparagana                                     | Am J Med Genet A. 2010 Mar;152A(3):573-81. doi: 10.1002/ajmg.a.33253.                     | 2010 |
| 1 | RC22-42 pt12  | 5 y         | M |                |              | 46,XY,r(22)                                                                     | 20186804 |                                                                                                                                                                                            |                                                                                                                                                                                |                                                                                           |      |
| 1 | RC22-43       | 1.5 y       | F | mat nl, pat nd |              | 46,XX,r(22)(p11.2q12.3)                                                         | 19940762 | Progressive edema leading to pleural effusions in a female with a ring chromosome 22 leading to a 22q13 deletion                                                                           | McGaughan J, Hadwen T, Clark R.                                                                                                                                                | Clin Dysmorphol. 2010 Jan;19(1):28-9. doi: 10.1097/MCD.0b013e3283301f58.                  | 2010 |
| 1 | RC22-44       | 28 y        | M |                | > 28 y       | 46,XY,r(22)(p12q13.3)                                                           | 21843971 | Azoospermia and paternal autosomal ring chromosomes: case report and literature review                                                                                                     | Rajesh H, Freckmann ML, Chapman M.                                                                                                                                             | Reprod Biomed Online. 2011 Oct;23(4):466-70. doi: 10.1016/j.rbmo.2011.08.003.             | 2011 |
| 1 | RC22-45       | pn, 22 gwks | F | de novo        | top          | 46,XX,r(22)(p11q13.2)[63]/45,XX,-22[3]/46,XX,idelic r[2]                        | 21271667 | Prenatal diagnosis and molecular characterization of two constitutional rings derived from one chromosome 22                                                                               | Gadjji M, Krabchi K, Langis P, Aboura A, Périgny M, Côté S, Ferland M, Drouin R.                                                                                               | Am J Med Genet A. 2011 Feb;155A(2):430-3. doi: 10.1002/ajmg.a.33654.                      | 2011 |
| 1 | RC22-46       | 5 y         | M | de novo        |              | 46,XY,r(22)                                                                     | 24052724 | Ring chromosome 22: a review of the literature and first report from India                                                                                                                 | Mahajan S, Kaur A, Singh J.                                                                                                                                                    | Balkan J Med Genet. 2012 Jun;15(1):55-9. doi: 10.2478/v10034-012-0009-8.                  | 2012 |
| 1 | RC22-47       | 5 y         | M | de novo        |              | 46,XY,r(22)(p11q13)                                                             | 21175598 | Ring chromosome 22 and neurofibromatosis type II: proof of two-hit model for the loss of the NF2 gene in the development of meningioma                                                     | Zirn B, Arning L, Bartels I, Shoukier M, Hoffjan S, Neubauer B, Hahn A.                                                                                                        | Clin Genet. 2012 Jan;81(1):82-7. doi: 10.1111/j.1399-0004.2010.01598.x. Epub 2010 Dec 22. | 2012 |
| 1 | RC22-48       | 29 y        | M |                | > 29 y       | 46,XY,r(22)(p11q25)                                                             | 23405794 | [Ring 22 chromosome syndrome induced azoospermia: a case report and literature review]                                                                                                     | Sha YW, Ding L, Song YQ, Ge YS, Zeng H, Li P.                                                                                                                                  | Zhonghua Nan Ke Xue. 2012 Dec;18(12):1111-4.                                              | 2012 |
| 1 | RC22-49       |             |   |                |              |                                                                                 | 23927807 | [Ring chromosome 22 in a case]                                                                                                                                                             | Pan L, Sun YL, Xu CM.                                                                                                                                                          | Zhonghua Er Ke Za Zhi. 2013 Apr;51(4):308-9.                                              | 2013 |

|   |                |             |   |         |        |                                            |          |                                                                                                                                                                                      |                                                                                                                                                  |                                                                                                |      |
|---|----------------|-------------|---|---------|--------|--------------------------------------------|----------|--------------------------------------------------------------------------------------------------------------------------------------------------------------------------------------|--------------------------------------------------------------------------------------------------------------------------------------------------|------------------------------------------------------------------------------------------------|------|
| 1 | RC22-50 pt1    | 5 y         | M | de novo |        | 46,XY,r(22)(p11.2q13.3)                    | 23635516 | Molecular and phenotypic characterization of ring chromosome 22 in two unrelated patients                                                                                            | Hannachi H, Mougou S, Benabdallah I, Soayh N, Kahloul N, Gaddour N, Le Lor'h M, Sanlaville D, El Ghezal H,                                       | Cytogenet Genome Res. 2013;140(1):1-11. doi: 10.1159/000350785. Epub 2013 Apr                  | 2013 |
| 1 | RC22-50 pt2    | 5 y         | F | de novo |        | 46,XX,r(22)(p11.2q13.3)                    | 23635516 | Prenatal diagnosis of complete ring chromosome 22 without phenotypical abnormalities                                                                                                 | Liou B, Su CF, Luo CH, Tsai HJ.                                                                                                                  | Taiwan J Obstet Gynecol. 2014 Sep;53(3):406-8. doi: 10.1016/j.tjog.2013.06.016.                | 2014 |
| 1 | RC22-51        | pn, 18 gwks | M | top     |        | AF: 46,XY,r(22)(p13q13)                    | 25286802 |                                                                                                                                                                                      |                                                                                                                                                  |                                                                                                |      |
| 1 | RC22-52        | 4 m         | M |         |        | 46,XY,r(22)(p13q13.3)                      | 25114695 | Atypical teratoid rhabdoid brain tumor in an infant with ring chromosome 22                                                                                                          | Cho EH, Park JB, Kim JK.                                                                                                                         | Korean J Pediatr. 2014 Jul;57(7):333-2014 6. doi: 10.3345/kjp.2014.57.7.333. Epub 2014 Jul 23. | 2014 |
| 1 | RC22-53 pt1    | 6 y         | F |         |        | 46,XX,r(22)(p13q13.33)                     | 24700634 | Clinical, cytogenetic, and molecular characterization of six patients with ring chromosomes 22, including one with concomitant 22q11.2 deletion                                      | Guilherme RS, Soares KC, Simioni M, Vieira TP, Gil-da-Silva-Lopes VL, Kim CA, Brunoni D, Spinner NB, Conlin LK, Christofolini DM, Kulikowski LD, | Am J Med Genet A. 2014 Jul;164A(7):1659-65. doi: 10.1002/ajmg.a.36512. Epub 2014 Apr 3.        | 2014 |
| 1 | RC22-53 pt2    | 6 y (child) | M |         | > 24 y | 46,XY,r(22)(p13q13.2)                      | 24700634 | [Genetic diagnosis and analysis for two cases of ring chromosome 22]                                                                                                                 | Peng Y, Tang G, Zhang R, Zhang Y, Xia Y, Ma R, Guo R, Wu L.                                                                                      | Zhonghua Yi Xue Yi Chuan Xue Za Zhi. 2016 Aug;33(4):494-7. doi:                                | 2016 |
| 1 | RC22-53 pt3    | 1 y         | F |         |        | 46,XX,r(22)                                | 24700634 |                                                                                                                                                                                      |                                                                                                                                                  |                                                                                                |      |
| 1 | RC22-53 pt4    | 7 y         | F |         |        | 46,XX,r(22)                                | 24700634 |                                                                                                                                                                                      |                                                                                                                                                  |                                                                                                |      |
| 1 | RC22-53 pt5    | 2 y         | M |         |        | 46,XY,r(22)                                | 24700634 |                                                                                                                                                                                      |                                                                                                                                                  |                                                                                                |      |
| 1 | RC22-53 pt6    | 21 y        | F |         | > 21 y | 46,XX,r(22)[0.88]/46,XX[0.12]              | 24700634 |                                                                                                                                                                                      |                                                                                                                                                  |                                                                                                |      |
| 1 | RC22-54 case 1 | 3 y         | M |         |        | 46,XY,r(22)(p11q13)[60]                    | 27455005 |                                                                                                                                                                                      |                                                                                                                                                  |                                                                                                |      |
| 1 | RC22-54 case 2 | 2 y         | M |         |        | 46,XY,r(22)(q13.2q13)[84]/45,XY,-22[6]     | 27455005 |                                                                                                                                                                                      |                                                                                                                                                  |                                                                                                |      |
| 1 | RC22-55        | 10 m        | F |         |        | 46,XX,r(22)(q13.1q13.3)[19]/46,XX,dic r[1] | 27734605 | Description of a new oncogenic mechanism for atypical teratoid rhabdoid tumors in patients with ring chromosome 22                                                                   | Byers HM, Adam MP, LaCroix A, Leary SE, Cole B, Dobyns WB, Mefford HC.                                                                           | Am J Med Genet A. 2017 Jan;173(1):245-249. doi: 10.1002/ajmg.a.37993. Epub 2016 Oct 12.        | 2017 |
| 1 | RC22-56        | 4 y         | F |         |        | 46,XX,r(21)                                | 29736186 | Compound phenotype in a girl with r(22), concomitant microdeletion 22q13.32-q13.33 and mosaic monosomy 22                                                                            | Kashevarova AA, Belyaeva EO, Nikonov AM, Plotnikova OV, Skryabin NA, Nikitina TV, Vasilyev SA, Yakovleva YS, Babushkina NP, Tolmacheva EN,       | Mol Cytogenet. 2018 Apr 27;11:26. doi: 10.1186/s13039-018-0375-3. eCollection 2018.            | 2018 |
| 1 | RC22-57        | 3 y         | F |         |        | 46,XX,r(22)(p11.2q13)                      | 29378768 | Chromothripsis and ring chromosome 22: a paradigm of genomic complexity in the Phelan-McDermid syndrome (22q13 deletion syndrome)                                                    | Kurtas N, Arrigoni F, Erricchio E, Zucca C, Maghini C, D'Angelo MG, Beri S, Giorda R, Bertuzzo S, Delledonne M,                                  | J Med Genet. 2018 Apr;55(4):269-277. doi: 10.1136/jmedgenet-2017-105125. Epub 2018 Jan 29.     | 2018 |
| 1 | RC22-58        |             |   |         |        | r(22)(q13.3)                               | 30647996 | MLPA is a practical and complementary alternative to CMA for diagnostic testing in patients with autism spectrum disorders and identifying new candidate CNVs associated with autism | Capkova P, Srovnal J, Capkova Z, Staffova K, Becvarova V, Trkova M, Adamova K, Santava A, Curtisova V, Hajduch M, Prochazka M.                   | PeerJ. 2019 Jan 9;6:e6183. doi: 10.7717/peerj.6183. eCollection 2019.                          | 2019 |
| 1 | RC22-59        | 18 y        | F |         | > 18 y | 46,XX,r(22)                                | 33550291 | Bilateral Vestibular Schwannomas in a Patient with Ring Chromosome 22: Case Report and Review of the Literature                                                                      | Nussbaum PE, Patel PD, Nussbaum LA, Hilton CW, Nussbaum ES.                                                                                      | Pediatr Neurosurg. 2021 Feb 5;1-5. doi: 10.1159/000513112. Online ahead of print.              | 2021 |
| 1 | RC22-60        | 2.5 y       | M | de novo |        | 46,XY,r(22)(p11.2q13.32)                   | 34777208 | Case Report: The Emerging Role of Ring Chromosome 22 in Phelan-McDermid Syndrome With Atypical Teratoid/Rhabdoid Tumor: The First Child Treated With Growth Hormone                  | Crocco M, Panciroli M, Milanaccio C                                                                                                              | Front Neurol. 2021 Oct 29;12:741062                                                            | 2021 |

| 71 | 61      | pn: prenatal; cp/ctb: continuous pregnancy/to birth; nd: not detected; d., deceased; |  |  |  |  |          |                                                                                                                |                                              |                                                                              |      |
|----|---------|--------------------------------------------------------------------------------------|--|--|--|--|----------|----------------------------------------------------------------------------------------------------------------|----------------------------------------------|------------------------------------------------------------------------------|------|
| 1  | RCX-[1] |                                                                                      |  |  |  |  |          | Self-perpetuating ring chromosome in a patient with gonadal dysgenesis                                         | Lindstern J, Rilling KG                      | Lancet 1962 279(7229):593-594                                                |      |
| 1  | RCX-1   |                                                                                      |  |  |  |  | 14147860 | A RING-X-CHROMOSOME IN PART OF THE SOMATIC CELLS OF A PATIENT WITH SOME CHARACTERISTICS OF THE TURNER SYNDROME | HUSTINX TW, STOELINGA GB.                    | Genetica. 1964;35:1-14. doi: 10.1007/BF01804870.                             | 1964 |
| 1  | RCX-2   |                                                                                      |  |  |  |  | 14172991 | H3-THYMIDINE UPTAKE BY A RING X CHROMOSOME IN A HUMAN FEMALE                                                   | ROWLEY J, MULDAL S, LINDSTEN J, GILBERT CW.  | Proc Natl Acad Sci U S A. 1964 May;51(5):779-86. doi: 10.1073/pnas.51.5.779. | 1964 |
| 1  | RCX-3   |                                                                                      |  |  |  |  | 14235684 | XG-A INVESTIGATIONS OF THE FAMILY OF A CHILD WITH A RING X CHROMOSOME                                          | NIJENHUIS LE, GEMSER-RUNIA J.                | Nature. 1964 Nov 21;204:792-3. doi: 10.1038/204792a0.                        | 1964 |
| 1  | RCX-4   |                                                                                      |  |  |  |  | 4165104  | A ring X chromosome in dwarfism                                                                                | Bain AD, Gault IK, Farquhar JW.              | Lancet. 1965 Apr 10;1(7389):820. doi: 10.1016/s0140-6736(65)92992-2.         | 1965 |
| 1  | RCX-5   |                                                                                      |  |  |  |  | 5885928  | Xg-a investigations of the family of a child with a ring X chromosome                                          | Sanger R, Race RR.                           | Nature. 1965 Aug 14;207(998):768. doi: 10.1038/207768b0.                     | 1965 |
| 1  | RCX-6   |                                                                                      |  |  |  |  | 5963206  | An XO-X ring X chromosome mosaicism in an individual with normal secondary sexual development                  | Bishop AM, Blank CE, Simpson K, Dewhurst CJ. | J Med Genet. 1966 Jun;3(2):129-33. doi: 10.1136/jmg.3.2.129.                 | 1966 |
| 1  | RCX-7   |                                                                                      |  |  |  |  | 5301758  | [Apropos of a cas of ring chromosome X]                                                                        | Deminatti M, Maillard E, Fossati P,          | Ann Genet. 1968 Mar;11(1):56-8.                                              | 1968 |

|   |        |         |                                                                                                                                                                            |                                                                                                                                               |                                                                                                                                              |      |
|---|--------|---------|----------------------------------------------------------------------------------------------------------------------------------------------------------------------------|-----------------------------------------------------------------------------------------------------------------------------------------------|----------------------------------------------------------------------------------------------------------------------------------------------|------|
| 1 | RCX-8  | 5404540 | [Turner's syndrome with ring X chromosome]                                                                                                                                 | Dallapiccola B, Zanardi F.                                                                                                                    | Rass Neurol Veg. 1969;23(5):243-55.                                                                                                          | 1969 |
| 1 | RCX-9  | 168059  | A case report of Turner's syndrome with ring X chromosome                                                                                                                  | Tanaka K, Otsuka Y, Fujii S, Morii H, Wada M, Fujita H.                                                                                       | Endocrinol Jpn. 1975 Apr;22(2):169-74. doi: 10.1507/endocrj1954.22.169.                                                                      | 1975 |
| 1 | RCX-10 | 7443121 | Turner phenotype in mother and daughter                                                                                                                                    | Muasher S, Baramki TA, Diggs ES.                                                                                                              | Obstet Gynecol. 1980 Dec;56(6):752-6.                                                                                                        | 1980 |
| 1 | RCX-11 | 6958260 | An infertile female with ring (X) chromosome constitution and evidence of ovulation                                                                                        | Smith A, Shale DJ, Dulk GD.                                                                                                                   | Aust N Z J Obstet Gynaecol. 1982 May;22(2):90-3. doi: 10.1111/j.1479-828x.1982.tb01411.x.                                                    | 1982 |
| 2 | RCX-12 | 6883789 | Turner syndrome patients with a ring X chromosome                                                                                                                          | Berkovitz G, Stamberg J, Plotnick LP, Lanes R.                                                                                                | Clin Genet. 1983 Jun;23(6):447-53. doi: 10.1111/j.1399-0004.1983.tb01980.x.                                                                  | 1983 |
| 2 | RCX-13 | 6152802 | Gonadal dysgenesis and somatic stigmata in patients with 45,X/46,Xr(X) ring chromosome                                                                                     | Portuondo JA, Barral A, Neyro JL, Camarero MC, Roman MD, Uribarren Albert PJ, Gille J, Schmid M.                                              | Int J Gynaecol Obstet. 1984 Aug;22(4):311-3. doi: 10.1016/0020-Geburtshilfe Frauenheilkd. 1986 Jul;46(7):473-4. doi: 10.1055/s-2008-1036240. | 1984 |
| 1 | RCX-14 | 3758629 | [A rare case of gonadal dysgenesis with 45, X-46, X ring X mosaic--case report]                                                                                            |                                                                                                                                               |                                                                                                                                              | 1986 |
| 1 | RCX-15 | 3198130 | A mosaic 45,X/46,X,r(?) karyotype investigated with X and Y centromere-specific probes using a non-autoradiographic in situ hybridization                                  | Crolla JA, Llerena JC Jr.                                                                                                                     | Hum Genet. 1988 Dec;81(1):81-4. doi: 10.1007/BF00283735.                                                                                     | 1988 |
| 0 | RCX-16 | 2080999 | High incidence of mental retardation in Turner syndrome patients with ring chromosome X formation                                                                          | Fryns JP, Kleczkowska A, Van Den Berghe H.                                                                                                    | Genet Couns. 1990;1(2):161-5.                                                                                                                | 1990 |
| 1 | RCX-17 | 2106786 | A ring X chromosome, 46,Y,r(X)(p22.33q28), as a cause of extreme short stature in a male                                                                                   | Ogata T, Matsuo N, Shimizu N.                                                                                                                 | Am J Med Genet. 1990 Feb;35(2):241-4. doi: 10.1002/ajmg.1320350219.                                                                          | 1990 |
| 2 | RCX-18 | 1758399 | [A report of 2 cases of Turner's syndrome with a ring X chromosome]                                                                                                        | Migliori MV, Bartolotta E, Maurizi M, Bonazzi P, Cardinale G, Manunza V.                                                                      | Minerva Pediatr. 1991 Sep;43(9):605-9.                                                                                                       | 1991 |
| 2 | RCX-19 | 1999837 | An investigation of ring and dicentric chromosomes found in three Turner's syndrome patients using DNA analysis and in situ hybridisation with X and Y chromosome specific | Cooper C, Crolla JA, Laister C, Johnston DI, Cooke P.                                                                                         | J Med Genet. 1991 Jan;28(1):6-9. doi: 10.1136/jmg.28.1.6.                                                                                    | 1991 |
| 1 | RCX-20 | 1339199 | 45,X/46,X,+r(X) can have a distinct phenotype different from Ullrich-Turner syndrome                                                                                       | Grompe M, Rao N, Elder FF, Caskey CT, Greenberg F.                                                                                            | Am J Med Genet. 1992 Jan 1;42(1):39-43. doi: 10.1002/ajmg.1320420110.                                                                        | 1992 |
| 5 | RCX-21 | 1632446 | Identification of the origin of ring/marker chromosomes in patients with Ullrich-Turner syndrome using X and Y specific alpha satellite DNA probes                         | Tharapel SA, Wilroy RS, Keath AM, Rivas ML, Tharapel AT.                                                                                      | Am J Med Genet. 1992 Mar 1;42(5):720-3. doi: 10.1002/ajmg.1320420519.                                                                        | 1992 |
| 1 | RCX-22 | 1557312 | Prenatal investigation of a 45,X/46,X,r(?) karyotype in amniocytes using fluorescence in situ hybridization with an X-centromeric probe                                    | Bajalica S, Bui TH, Koch J, Bröndum-Nielsen K.                                                                                                | Prenat Diagn. 1992 Jan;12(1):61-4. doi: 10.1002/pd.1970120109.                                                                               | 1992 |
| 6 | RCX-23 | 1415351 | Ullrich-Turner syndrome with a small ring X chromosome and presence of mental retardation                                                                                  | Van Dyke DL, Wiktor A, Palmer CG, Miller DA, Witt M, Babu VR, Worsham MJ, Roberson JR, Weiss L.                                               | Am J Med Genet. 1992 Aug 1;43(6):996-1005. doi: 10.1002/ajmg.1320430617.                                                                     | 1992 |
| 3 | RCX-24 | 8326492 | Three patients with ring (X) chromosomes and a severe phenotype                                                                                                            | Dennis NR, Collins AL, Crolla JA, Cockwell AE, Fisher AM, Jacobs PA.                                                                          | J Med Genet. 1993 Jun;30(6):482-6. doi: 10.1136/jmg.30.6.482.                                                                                | 1993 |
| 1 | RCX-25 | 8225318 | Molecular analysis of a ring chromosome X in a family with fragile X syndrome                                                                                              | Mornet E, Bogyo A, Deluchat C, Simon-Bouy B, Mathieu M, Thépot F, Grisard Rajangam S, Lincoln S, Hegde S, Jayashree, Manjunath NA, Thomas IM. | Hum Genet. 1993 Oct;92(4):373-8. doi: 10.1007/BF01247338.                                                                                    | 1993 |
| 1 | RCX-26 | 8077037 | FISH techniques in a Turner mosaic with ring X chromosome                                                                                                                  |                                                                                                                                               | Indian Pediatr. 1993 Dec;30(12):1451-4.                                                                                                      | 1993 |
| 8 | RCX-27 | 8265665 | Deficient transcription of XIST from tiny ring X chromosomes in females with severe phenotypes                                                                             | Migeon BR, Luo S, Stasiowski BA, Jani M, Axelman J, Van Dyke DL, Weiss L, Jacobs PA, Yang-Feng TL, Migeon BR, Luo S, Jani M, Jeppesen P.      | Proc Natl Acad Sci U S A. 1993 Dec 15;90(24):12025-9. doi: 10.1073/pnas.90.24.12025.                                                         | 1993 |
| 3 | RCX-28 | 8079992 | The severe phenotype of females with tiny ring X chromosomes is associated with inability of these chromosomes to undergo X inactivation                                   |                                                                                                                                               | Am J Hum Genet. 1994 Sep;55(3):497-504.                                                                                                      | 1994 |
| 9 | RCX-29 | 7966189 | A comparison of the clinical and cytogenetic findings in nine patients with a ring (X) cell line and 16 45,X patients                                                      | Collins AL, Cockwell AE, Jacobs PA, Dennis NR.                                                                                                | J Med Genet. 1994 Jul;31(7):528-33. doi: 10.1136/jmg.31.7.528.                                                                               | 1994 |
| 1 | RCX-30 | 7762970 | An atypical Turner syndrome patient with ring X chromosome mosaicism                                                                                                       | Cantú ES, Jacobs DF, Pai GS.                                                                                                                  | Ann Clin Lab Sci. 1995 Jan-Feb;25(1):60-5.                                                                                                   | 1995 |

|   |        |          |                                                                                                                                                                                                                          |                                                                                                          |                                                                                     |
|---|--------|----------|--------------------------------------------------------------------------------------------------------------------------------------------------------------------------------------------------------------------------|----------------------------------------------------------------------------------------------------------|-------------------------------------------------------------------------------------|
| 1 | RCX-31 | 7760319  | Molecular cytogenetic characterisation of a small ring X chromosome in a Turner patient and in a male patient with congenital abnormalities: role of X inactivation                                                      | Callen DF, Eyre HJ, Dolman G, Garry-Battersby MB, McCreanor JR, Valeba A, McGill JJ.                     | J Med Genet. 1995 Feb;32(2):113-6. 1995<br>doi: 10.1136/jmg.32.2.113.               |
| 1 | RCX-32 | 9091352  | A Turner syndrome woman with a ring X chromosome [45,X/46,X,r(X)(p22.3q27)] whose child also had a ring X chromosome                                                                                                     | Uehara S, Nata M, Obara Y, Niinuma T, Funato T, Yajima A.                                                | Fertil Steril. 1997 Mar;67(3):576-9. 1997<br>doi: 10.1016/s0015-0282(97)80011-x.    |
| 1 | RCX-33 | 9129739  | Ring chromosome X in a child with manifestations of Kabuki syndrome                                                                                                                                                      | McGinniss MJ, Brown DH, Burke LW, Mascarello JT, Jones MC.                                               | Am J Med Genet. 1997 May 1997<br>2;70(1):37-42.                                     |
| 1 | RCX-34 | 9129738  | Prune-belly syndrome and other anomalies in a stillborn fetus with a ring X chromosome lacking                                                                                                                           | Guillén DR, Lowichik A, Schneider NR, Cohen DS, Garcia S, Zinn AR.                                       | Am J Med Genet. 1997 May 1997<br>2;70(1):32-6. doi:                                 |
| 1 | RCX-35 | 9462277  | Common variable immunodeficiency with CD4+ T lymphocytopenia and overproduction of soluble IL-2 receptor associated with Turner's syndrome and dorsal kyphoscoliosis                                                     | al-Attas RA, Rahi AH, Ahmed el-FE.                                                                       | J Clin Pathol. 1997 Oct;50(10):876-9. doi: 10.1136/jcp.50.10.876.                   |
| 1 | RCX-36 | 9737776  | Microphthalmia with linear skin defects syndrome in a mosaic female infant with monosomy for the Xp22 region: molecular analysis of the Xp22 breakpoint and the X-inactivation pattern                                   | Ogata T, Wakui K, Muroya K, Ohashi H, Matsuo N, Brown DM, Ishii T, Fukushima Y.                          | Hum Genet. 1998 Jul;103(1):51-6. 1998<br>doi: 10.1007/s004390050782.                |
| 1 | RCX-37 | 9832041  | Severe phenotype resulting from an active ring X chromosome in a female with a complex karyotype: characterisation and replication study                                                                                 | Stavropoulou C, Mignon C, Delobel B, Moncla A, Depetris D, Croquette MF, Mattei MG.                      | J Med Genet. 1998 Nov;35(11):932-8. doi: 10.1136/jmg.35.11.932.                     |
| 5 | RCX-38 | 10490708 | Social, communicational, and behavioral deficits associated with ring X turner syndrome                                                                                                                                  | El Abd S, Patton MA, Turk J, Hoey H, Howlin P.                                                           | Am J Med Genet. 1999 Oct 1999<br>15;88(5):510-6. doi:<br>10.1002/(sici)1096-        |
| 1 | RCX-39 | 10766981 | Mother and daughter with 45,X/46,X,r(X)(p22.3q28) and mental retardation: analysis of the X-inactivation patterns                                                                                                        | Matsuo M, Muroya K, Nanao K, Hasegawa Y, Terasaki H, Kosaki K, Ogata T.                                  | Am J Med Genet. 2000 Apr 2000<br>10;91(4):267-72.                                   |
| 2 | RCX-40 | 10861682 | Severe phenotypes associated with inactive ring X chromosomes                                                                                                                                                            | Migeon BR, Ausems M, Giltay J, Hasley-Royster C, Kazi E, Lydon TJ, Engelen JJ,                           | Am J Med Genet. 2000 Jul 2000<br>3;93(1):52-7.                                      |
| 1 | RCX-41 | 11111386 | [Familial occurrence of Turner syndrome]                                                                                                                                                                                 | Lukács Valéria H, Tardy Erika P, Molnár                                                                  | Orv Hetil. 2000 Nov 5;141(45):2443-2000                                             |
| 2 | RCX-42 | 11155770 | Autoimmune thyroiditis in children with Turner syndrome                                                                                                                                                                  | Chang P, Tsai WY, Hou JW, Hsiao PH, Lee JS.                                                              | J Formos Med Assoc. 2000 2000<br>Nov;99(11):823-6.                                  |
| 0 | RCX-43 | 11462660 | [Active ring X chromosome]                                                                                                                                                                                               | Ogata T.                                                                                                 | Ryoikibetsu Shokogun Shirizu. 2001                                                  |
| 1 | RCX-44 | 11313755 | A Rett syndrome patient with a ring X chromosome: further evidence for skewing of X inactivation and heterogeneity in the aetiology of                                                                                   | Rosenberg C, Wouters CH, Szuhai K, Dorland R, Pearson P, Poll-The BT,                                    | Eur J Hum Genet. 2001 2001<br>Mar;9(3):171-7. doi:<br>10.1038/sj.ejhg.5200604.      |
| 1 | RCX-45 | 11755101 | Second trimester prenatal diagnosis of epignathus teratoma in ring X chromosome mosaicism with inactive ring X chromosome                                                                                                | Colombijn RM, Breuning M, Lindhout Witters I, Moerman P, Louwagie D, Van Assche FA, Migeon BR, Fryns JP. | Ann Genet. 2001 Oct-Dec;44(4):179-2001<br>82. doi: 10.1016/s0003-3995(01)01090-5.   |
| 1 | RCX-46 | 11484209 | Kabuki syndrome-like features associated with a small ring chromosome X and XIST gene                                                                                                                                    | Stankiewicz P, Thiele H, Giannakudis I, Schlicker M, Baldermann C, Krüger A,                             | Am J Med Genet. 2001 Aug 2001<br>15;102(3):286-92. doi:                             |
| 1 | RCX-47 | 11896455 | Lack of expression of XIST from a small ring X chromosome containing the XIST locus in a girl with short stature, facial dysmorphism and developmental delay                                                             | Tomkins DJ, McDonald HL, Farrell SA, Brown CI.                                                           | Eur J Hum Genet. 2002 Jan;10(1):44-2002<br>51. doi: 10.1038/sj.ejhg.5200757.        |
| 1 | RCX-48 | 11941480 | Molecular characterization of a ring X chromosome in a male with short stature                                                                                                                                           | Ellison JW, Tekin M, Sikes KS, Yankowitz J, Shapiro L, Rappold GA,                                       | Hum Genet. 2002 Apr;110(4):322-6. 2002<br>doi: 10.1007/s00439-002-0685-7.           |
| 4 | RCX-49 | 12900575 | The proportion of cells with functional X disomy is associated with the severity of mental retardation in mosaic ring X Turner syndrome females                                                                          | Kubota T, Wakui K, Nakamura T, Ohashi H, Watanabe Y, Yoshino M, Kida T, Okamoto N, Matsumura M,          | Cytogenet Genome Res. 2002;99(1-2002<br>4):276-84. doi: 10.1159/00071604.           |
| 1 | RCX-50 | 15337477 | Turner syndrome female with a small ring X chromosome lacking the XIST, an unexpectedly mild phenotype and an atypical association with alopecia universalis                                                             | Bouayed Abdelmoula N, Portnoi MF, Amouri A, Arladan A, Chakroun M, Saad A, Hchicha M, Turki H, Rebai T.  | Ann Genet. 2004 Jul-Sep;47(3):305-2004<br>13. doi:<br>10.1016/j.anngen.2004.03.008. |
| 1 | RCX-51 | 16007631 | Microdeletion in the SHOX 3' region associated with skeletal phenotypes of Langer mesomelic dysplasia in a 45,X/46,X,r(X) infant and Leri-Weill dyschondrosteosis in her 46,XX mother: implication for the SHOX enhancer | Fukami M, Okuyama T, Yamamori S, Nishimura G, Ogata T.                                                   | Am J Med Genet A. 2005 Aug 2005<br>15;137(1):72-6. doi:<br>10.1002/ajmg.a.30852.    |
| 1 | RCX-52 | 17252699 | Mosaic Turner syndrome and hyperinsulinaemic hypoglycaemia.                                                                                                                                                              | Alkhatyat H, Christesen HB, Steer J, Stewart H, Brusgaard K, Hussain K                                   | J Pediatr Endocrinol Metab. 2006 Dec;19(12):1451-7. doi:                            |

|               |        |      |   |         |                |          |                                                                                                                                                        |                                                                                                                                        |                                                                                      |      |
|---------------|--------|------|---|---------|----------------|----------|--------------------------------------------------------------------------------------------------------------------------------------------------------|----------------------------------------------------------------------------------------------------------------------------------------|--------------------------------------------------------------------------------------|------|
| 1             | RCX-53 |      |   |         |                | 19653414 | Kabuki make-up (Niihawa-Kuroki) syndrome with mosaicism ring chromosome X and incomplete XIST gene expression                                          | Su PH, Kuo PL, Chen SJ, Chen JY, Yu JS, Liu YL, Kao IW.                                                                                | Acta Paediatr Taiwan. 2007 Jan-Feb;48(1):28-31.                                      | 2007 |
| 1             | RCX-54 |      |   |         |                | 18177863 | Mosaic ring X chromosome in a case of secondary amenorrhea                                                                                             | Chrisoulidou A, Bili H, Georgiou E, Mavroudi S, Lazaridou AS.                                                                          | Fertil Steril. 2008 Oct;90(4):1198.e19-21. doi:                                      | 2008 |
| 1             | RCX-55 |      |   |         |                | 18639760 | Becker muscular dystrophy with r(X) carrying an out-of-frame DMD deletion                                                                              | Lee KA, Han SH, Choi JR, Chung JS, Choi YC.                                                                                            | Pediatr Neurol. 2008 Aug;39(2):129-32. doi: 10.1016/j.pediatrneurol.2008.05.002.     | 2008 |
| 1             | RCX-56 |      |   |         |                | 19189708 | Possible relationship between ring X chromosome and neonatal hypoglycemia                                                                              | Goto M.                                                                                                                                | J Pediatr Endocrinol Metab. 2008 Nov;21(11):1103. doi: 10.1515/jpem.2008.21.11.1103. | 2008 |
| 1             | RCX-57 |      |   |         |                | 18925662 | A small and active ring X chromosome in a female with features of Kabuki syndrome                                                                      | Rodríguez L, Diego-Alvarez D, Lorda-Sanchez I, Gallardo FL, Martínez-Fernández ML, Arroyo-Muñoz ME,                                    | Am J Med Genet A. 2008 Nov 1;146A(21):2816-21. doi: 10.1002/ajmg.a.32521.            | 2008 |
| 1             | RCX-58 |      |   |         |                | 18655707 | Mosaicism for r(X) and der(X)del(X)(p11.23)dup(X)(p11.21p11.22) provides insight into the possible mechanism of rearrangement                          | Shchelochkov OA, Cooper ML, Ou Z, Peacock S, Yatsenko SA, Brown CW, Fang P, Stankiewicz P, Cheung SW.                                  | Mol Cytogenet. 2008 Jul 25;1:16. doi: 10.1186/1755-8166-1-16.                        | 2008 |
| 4             | RCX-59 |      |   |         |                | 19192353 | Feasibility of fertility preservation in young females with Turner syndrome                                                                            | Lau NM, Huang JY, MacDonald S, Elizur S, Gidoni Y, Holzer H, Chian RC, Tulandi T, Tan SL.                                              | Reprod Biomed Online. 2009 Feb;18(2):290-5. doi: 10.1016/s1472-6483(10)60268-4.      | 2009 |
| 1             | RCX-60 |      |   |         |                | 22410210 | Barth syndrome in a female patient                                                                                                                     | Cosson L, Toutain A, Simard G, Kulik W, Matyas G, Guichet A, Blasco H, Maakaroun-Vermesse Z, Vaillant MC,                              | Mol Genet Metab. 2012 May;106(1):115-20. doi: 10.1016/j.ymgme.2012.01.015.           | 2012 |
| 1             | RCX-61 |      |   |         |                | 22250632 | Turner syndrome with a ring X chromosome and atypical skin manifestation: port wine stain                                                              | Onal H, Adal E, Ersen A, Onal Z.                                                                                                       | Int J Dermatol. 2012 Feb;51(2):207-10. doi: 10.1111/j.1365-4632.2011.05031.x.        | 2012 |
| 1             | RCX-62 |      |   |         |                | 26064751 | Hyperinsulinemic Hypoglycaemia in a Turner Syndrome with Ring (X)                                                                                      | Cappella M, Graziani V, Pragliola A, Sensi A, Hussain K, Muratori C, Marchetti F.                                                      | Case Rep Pediatr. 2015;2015:561974. doi: 10.1155/2015/561974.                        | 2015 |
| 2             | RCX-63 |      |   |         |                | 27387888 | Molecular cytogenetic characterization of two Turner syndrome patients with mosaic ring X                                                              | Chauhan P, Jaiswal SK, Lakhotia AR, Rai AK.                                                                                            | J Assist Reprod Genet. 2016 Sep;33(9):1161-8. doi:                                   | 2016 |
| 1             | RCX-64 |      |   |         |                | 33020433 | Coexistence of Growth Hormone Deficiency and Pituitary Microadenoma in a Child with Unique Mosaic Turner Syndrome: A Case Report and Literature Review | Park EG, Kim EJ, Kim EJ, Kim HY, Kim SH, Yang A.                                                                                       | Diagnostics (Basel). 2020 Oct 4;10(10):783. doi: 10.3390/diagnostics10100783.        | 2020 |
| 1             | RCX-65 | 4 y  | M | de novo | 45,X/46,Y,r(X) | 33872775 | Hypospadias in ring X syndrome                                                                                                                         | Elghezal H, Alfayez K, Ben Abdallah I, Alfares A, Almazayad A, Al Jasser A, Almobadel N, Alsuhaibani O, Das D, Roy D, Basu K, Sarkar A | Eur J Med Genet. 2021 Apr 16;104225. doi: 10.1016/j.ejmg.2021.104225.                | 2021 |
| 1             | RCX-66 | 17 y | F | na      | 45,X/46,X,r(X) | 34987848 | Decoding enigma: Turner syndrome with ring chromosome                                                                                                  | Mnif-Feki M, Safi W, Bougacha-Elleuch N                                                                                                | Oxf Med Case Reports. 2021 Dec 28;2021(11-12)                                        | 2021 |
| 1             | RCX-67 |      |   |         |                | 34124982 | Occurrence of Hypopituitarism in Tunisian Turner Syndrome patients: familial versus sporadic cases                                                     |                                                                                                                                        | Gynecol Endocrinol. 2021 Sep;37(9):848-852                                           |      |
| <b>111 68</b> |        |      |   |         |                |          |                                                                                                                                                        |                                                                                                                                        |                                                                                      |      |
| 1             | RCY-1  | 33 y | M |         |                | 5127018  | Meiotic studies on a subfertile patient with a ring Y chromosome                                                                                       | A C Chandley, P Edmond                                                                                                                 | Cytogenetics, 1971;10(4):295-304. doi: 10.1159/000130149.                            | 1971 |
| 1             | RCY-2  |      |   |         |                | 4708485  | Y ring chromosome associated with gonadoblastoma in situ                                                                                               | G Khudr, K Benirschke                                                                                                                  | Obstet Gynecol. 1973; 41(6):897-901                                                  | 1973 |
| 1             | RCY-3  |      |   |         |                | 4544085  | Abnormalities of human sex chromosomes. I. A ring Y without mosaicism.                                                                                 | J German, J L Simpson, G A McLemore                                                                                                    | J Ann Genet. 1973 Dec;16(4):225-31.                                                  | 1973 |
| 1             | RCY-4  | 6 m  | M |         |                | 4703024  | Sex chromosome anomalies detection and fluoresc                                                                                                        | Fabris C, Franceschini P, Bogetti G, Ponz                                                                                              | Acta Paediatr Scand. 1973 May;62(3)                                                  | 1973 |
| 1             | RCY-5  |      |   |         |                | 4135787  | 45,X-45,X, ace(?Yp)plus-46,X,r(Y) in a phenotypically normal newborn male                                                                              | U Ruthner, E Golob                                                                                                                     | Humangenetik, 1974, 22(2):177-80                                                     | 1974 |
| 1             | RCY-6  |      |   |         |                | 4469774  | A rare structural anomaly of the Y chromosome: Y                                                                                                       | E M Bühler, T Tsuchimoto, U K Bühler, C                                                                                                | Arch Genet. 1974;47(1):52-9                                                          | 1974 |
| 1             | RCY-7  | 30 y | M |         |                | 965013   | Ring Y chromosome: 45,X/46,Xr(Y) chromosome mosaicism in a phenotypically normal male with azoospermia                                                 | T Maeda, M Ohno, A Ishibashi, M Samej                                                                                                  | Hum Genet , 1976 34(1):99-102                                                        | 1976 |
| 1             | RCY-8  | 53 y | M |         |                | 953209   | Ring Y chromosome without mosaicism                                                                                                                    | M G Wilson, R B Stein, J W Towner                                                                                                      | Birth Defects Orig Artic Ser 1976;12(5):105-12                                       | 1976 |
| 1             | RCY-9  |      |   |         |                | 914284   | Nonmosaic 46,X,r(Y) karyotype with female phenotype                                                                                                    | László J, Gaál M, Bószé P.                                                                                                             | Hum Genet. 1977 Oct 14;38(3):351-6. doi: 10.1007/BF00402164.                         | 1977 |
| 1             | RCY-10 |      |   |         |                | 649173   | A case of ring Y chromosome                                                                                                                            | Taillemite JL, van den Akker J, Portnoi MF, Le Porrier N, Marmor D, Bouillie J,                                                        | Hum Genet. 1978 May 16;42(1):89-91. doi: 10.1007/BF00291630.                         | 1978 |
| 1             | RCY-11 |      |   |         |                | 479854   | [Structural abnormalities of the Y chromosome. Observations in ten cases]                                                                              | Mattei JF, Mattei MG, Lucas C, Giraud F.                                                                                               | J Genet Hum. 1979 Mar;27(1):53-66.                                                   | 1979 |

|   |        |          |                                                                                                                                        |                                                                                                                                     |                                                                                                     |      |
|---|--------|----------|----------------------------------------------------------------------------------------------------------------------------------------|-------------------------------------------------------------------------------------------------------------------------------------|-----------------------------------------------------------------------------------------------------|------|
| 1 | RCY-12 | 457111   | Unstable ring Y chromosome in an aspermic male                                                                                         | Steinbach P, Fabry H, Scholz W.                                                                                                     | Hum Genet. 1979 Apr 5;47(3):227-31. doi: 10.1007/BF00321013.                                        | 1979 |
| 1 | RCY-13 | 7252090  | [45X/46XY/46XrY mosaic with banding and the Turner phenotype (author's trans)]                                                         | Aubert L, Verdet C, Giraud F, Mattei JF.                                                                                            | J Gynecol Obstet Biol Reprod (Paris). 1981;10(1):57-60.                                             | 1981 |
| 1 | RCY-14 | 6951928  | A chromosomal survey of mentally retarded children in Taipei. IV. An azoospermic male with unstable ring Y chromosome                  | Lai HC, Wang S, Lai JS, Wuu KD.                                                                                                     | Taiwan Yi Xue Hui Za Zhi. 1981 Dec;80(12):1327-31.                                                  | 1981 |
| 4 | RCY-15 | 2409888  | G-11 staining in Turner's syndrome with mos 45,X/46,X,r(?)                                                                             | de Almeida JC, Llerena JC Jr, Molina Gomes D, Rita Martins R, Jung M, Reis Mendez H.                                                | Ann Genet. 1985;28(1):37-41.<br>Am J Med Genet. 1986 May;24(1):201-2. doi: 10.1002/ajmg.1320240126. | 1985 |
| 1 | RCY-16 | 3706407  | Ring Y chromosome                                                                                                                      |                                                                                                                                     | J Med Genet. 1987 Feb;24(2):101-6. doi: 10.1136/jmg.24.2.101.                                       | 1987 |
| 0 | RCY-17 | 3560166  | Ring XY bivalent: a new phenomenon at metaphase I of meiosis in man                                                                    | Chandley AC, Hargreave TB, McBeath S, Mitchell AR, Speed RM.                                                                        |                                                                                                     | 1987 |
| 1 | RCY-18 | 3320994  | [Mosaicism 45,X/46,X,r(Y) associated with mixed gonadal dysgenesis. Description of a case and review of the literature]                | Bruni L, Gregory S, Boldrini R, Brinchi V, Ferrante E.                                                                              | Pediatr Med Chir. 1987 Jul-Aug;9(4):495-7.                                                          | 1987 |
| 1 | RCY-19 | 2965862  | [Down's syndrome with Turner mosaicism/Y chromosome in a ring: 46,X+21/47X(r)Y,+21]                                                    | Campos Tristán C, Vila Dupla S, Fernández Marín L, González MJ.                                                                     | An Esp Pediatr. 1987 Dec;27(6):479-80.                                                              | 1987 |
| 1 | RCY-20 | 3265307  | Giemsa-11 technique elucidating three structurally altered nonfluorescent Y chromosomes: r (Y), idic (Yp), dir tan dup (Yp)            | Kosztolányi G.                                                                                                                      | Ann Genet. 1988;31(4):235-40.                                                                       | 1988 |
| 1 | RCY-21 | 3057830  | [A case of male pseudohermaphroditism with structural abnormalities of Y chromosome (ring Y)]                                          | Watanabe H, Hachisuka Y, Watase H, Fushimi N, Ohtaguro K.                                                                           | Hinyokika Kiyo. 1988 Aug;34(8):1469-74.                                                             | 1988 |
| 1 | RCY-22 | 3417311  | Fluorescence in situ hybridization and Y ring chromosome                                                                               | Kozma R, Fear C, Adinolfi M.                                                                                                        | Hum Genet. 1988 Sep;80(1):95-6. doi: 10.1007/BF00451465.                                            | 1988 |
| 1 | RCY-23 | 2709396  | Identification and characterisation of a small marker chromosome using non-isotopic in situ hybridisation with X and Y specific probes | Crolla JA, Smith M, Docherty Z.                                                                                                     | J Med Genet. 1989 Mar;26(3):192-4. doi: 10.1136/jmg.26.3.192.                                       | 1989 |
| 1 | RCY-24 | 2354546  | Phenotype of two males with abnormal Y chromosomes                                                                                     | Mičić M, Mičić S, Babić M, Diklić V.                                                                                                | Clin Genet. 1990 May;37(5):321-6. doi: 10.1111/j.1399-0004.1990.tb03513.x.                          | 1990 |
| 1 | RCY-25 | 2013232  | Ring Y chromosome: molecular characterization by DNA probes                                                                            | Pohlschmidt M, Rappold G, Krause M, Ahlert D, Hosenfeld D, Weissenbach J, Wegner RD, Scherer G, Pohlschmidt M, L'Allemand D, Gal A. | Cytogenet Cell Genet. 1991;56(2):65-8. doi: 10.1111/j.1399-0004.1992.tb03142.x.                     | 1991 |
| 1 | RCY-26 | 1424234  | Ring Y chromosome: cytogenetic and molecular characterization                                                                          |                                                                                                                                     | Clin Genet. 1992 Aug;42(2):71-5. doi: 10.1111/j.1399-0004.1992.tb03142.x.                           | 1992 |
| 1 | RCY-27 | 8215218  | Identification of ring Y chromosome: cytogenetic analysis, Southern blot and fluorescent in situ hybridization                         | Pezzolo A, Perroni L, Gimelli G, Arslanian A, Porta S, Gandullia P, Gandullia E.                                                    | Ann Genet. 1993;36(2):121-5.                                                                        | 1993 |
| 1 | RCY-28 | 9056556  | PCR and FISH analysis of a ring Y chromosome                                                                                           | Henegariu O, Kernek S, Keating MA, Palmer CG, Heerema NA.                                                                           | Am J Med Genet. 1997 Mar 17;69(2):171-6. doi: 10.1002/(sici)1096-5714(4)426-9.                      | 1997 |
| 1 | RCY-29 | 9286449  | A case with mosaic di-, tetra-, and octacentric ring Y chromosomes                                                                     | Henegariu O, Pescovitz OH, Vance GH, Verbrugge J, Heerema NA.                                                                       | Am J Med Genet. 1997 Sep 5;71(4):426-9.                                                             | 1997 |
| 2 | RCY-30 | 9438785  | Molecular investigation of two male subjects with short stature and a 45,X/46,X,ring(Y) karyotype                                      | Sher ES, Addeleston MB, Plotnick L, Urban MD, Berkovitz GD.                                                                         | Horm Res. 1998;49(1):46-50. doi: 10.1159/000023125.                                                 | 1998 |
| 2 | RCY-31 | 10424817 | Two male patients with ring Y: definition of an interval in Yq contributing to Turner syndrome                                         | Tzancheva M, Kaneva R, Kumanov P, Williams G, Tyler-Smith C.                                                                        | J Med Genet. 1999 Jul;36(7):549-53.                                                                 | 1999 |
| 1 | RCY-32 | 10442333 | 45,X/46,X,r(Y) karyotype transmitted by father to son after intracytoplasmic sperm injection for oligospermia. A case report           | Bofinger MK, Needham DF, Saldana LR, Sosnowski JP, Blough RI.                                                                       | J Reprod Med. 1999 Jul;44(7):645-8.                                                                 | 1999 |
| 1 | RCY-33 | 10951455 | Novel ring chromosome composed of X- and Y-derived material in a girl with manifestations of Ullrich-Turner syndrome                   | Grass FS, Brown CA, Backeljauw PF, Lucas A, Brasington C, Gazak JM, Nakano S, Ostrowski RS, Spence JE.                              | Am J Med Genet. 2000 Aug 28;93(5):343-8.                                                            | 2000 |
| 1 | RCY-34 | 11334610 | A case of ambiguous genitalia presenting with a 45,X/46,Xr(Y)(p11.2;q11.23)/47,X,idic(Y)(p11.2),idic(Y)(p11.2) karyotype.              | Dundar M, Lowther G, Acar H, Kurtoglu S, Demiryilmaz F, Kucukaydin M                                                                | Ann Genet. 2001 Jan-Mar;44(1):5-8. doi: 10.1016/s0003-3995(00)01034-0.                              | 2001 |
| 0 | RCY-35 | 11755098 | Y-chromosome mosaicism with ring Y-chromosome/idic(Y)(p11.2) and "normal" ovarian development                                          | Fryns JP.                                                                                                                           | Ann Genet. 2001 Oct-Dec;44(4):169. doi: 10.1016/s0003-3995(01)01076-0.                              | 2001 |



**Table S2: Relative Frequency of Constitutional Ring Chromosomes (RCs) and Cytogenomic Findings in PubMed 1962-2022**

| RC       | Case Count | Relative Frequency | No. Publications | PubMed Assessed | CMA | Complete RC | Simple del | Complex del/dup | Prenatal | TOP | SB | CP | Postnatal | Adult | Die | De novo | Mat | Pat |
|----------|------------|--------------------|------------------|-----------------|-----|-------------|------------|-----------------|----------|-----|----|----|-----------|-------|-----|---------|-----|-----|
| RC1      | 7          | 0.0068627          | 7                | 7               | 1   |             | 1          |                 | 0        |     |    |    | 7         |       | 1   | 2       |     |     |
| RC2      | 14         | 0.0137255          | 13               | 12              | 4   |             | 4          |                 | 1        | 1   |    |    | 11        | 1     | 1   | 9       |     | 1   |
| RC3      | 11         | 0.0107843          | 12               | 9               | 2   |             | 2          |                 | 0        |     |    |    | 9         | 2     |     | 6       |     |     |
| RC4      | 34         | 0.0333333          | 36               | 31              | 7   | 1           | 5          | 1               | 3        | 1   | 1  | 1  | 28        | 4     | 5   | 24      |     |     |
| RC5      | 13         | 0.0127451          | 10               | 10              | 1   |             | 1          |                 | 0        |     |    |    | 10        |       | 1   | 8       |     | 1   |
| RC6      | 39         | 0.0382353          | 35               | 38              | 8   |             | 5          | 3               | 7        | 3   | 1  | 3  | 31        | 2     | 3   | 22      |     |     |
| RC7      | 21         | 0.0205882          | 24               | 20              | 3   |             | 3          |                 | 1        | 1   |    |    | 19        | 4     | 3   | 9       |     |     |
| RC8      | 9          | 0.0088235          | 9                | 7               | 1   |             |            | 1               | 0        |     |    |    | 7         | 2     |     | 3       |     | 1   |
| RC9      | 32         | 0.0313725          | 32               | 25              | 8   | 1           | 4          | 3               | 2        | 2   |    |    | 23        | 4     | 3   | 10      |     |     |
| RC10     | 18         | 0.0176471          | 17               | 17              | 6   |             | 6          |                 | 1        | 1   |    |    | 16        | 1     | 2   | 11      |     |     |
| RC11     | 17         | 0.0166667          | 14               | 17              | 6   |             | 5          | 1               | 1        | 1   |    |    | 16        | 3     | 2   | 8       |     | 2   |
| RC12     | 7          | 0.0068627          | 7                | 7               | 1   |             |            | 1               | 0        |     |    |    | 7         | 4     |     | 2       |     |     |
| RC13     | 82         | 0.0803922          | 71               | 63              | 20  | 1           | 13         | 6               | 10       | 8   | 2  |    | 53        | 7     | 3   | 29      |     | 1   |
| RC14     | 73         | 0.0715686          | 66               | 51              | 7   | 2           | 4          | 1               | 3        | 3   |    |    | 48        | 4     | 2   | 13      |     | 1   |
| RC15     | 75         | 0.0735294          | 62               | 64              | 14  |             | 11         | 3               | 7        | 4   | 3  |    | 57        | 13    | 1   | 32      |     | 5   |
| RC16     | 5          | 0.004902           | 5                | 5               | 0   |             |            |                 | 0        |     |    |    | 5         | 1     |     | 3       |     |     |
| RC17     | 20         | 0.0196078          | 23               | 17              | 3   | 1           | 2          |                 | 1        | 1   |    |    | 16        | 4     | 1   | 8       |     |     |
| RC18     | 110        | 0.1078431          | 92               | 95              | 25  |             | 20         | 5               | 8        | 7   |    | 1  | 87        | 15    | 3   | 28      |     | 5   |
| RC19     | 6          | 0.0058824          | 6                | 6               | 1   | 1           |            |                 | 1        |     | 1  |    | 5         | 2     |     | 2       |     | 2   |
| RC20     | 118        | 0.1156863          | 80               | 100             | 6   | 3           | 2          | 1               | 2        | 1   |    | 1  | 98        | 34    | 1   | 14      |     | 6   |
| RC21     | 72         | 0.0705882          | 74               | 60              | 18  | 1           | 11         | 6               | 8        | 2   |    | 6  | 52        | 16    | 2   | 21      |     | 11  |
| RC22     | 71         | 0.0696078          | 61               | 66              | 21  | 2           | 17         | 2               | 6        | 6   |    |    | 60        | 17    | 1   | 21      |     | 2   |
| Subtotal | 854        |                    | 756              | 727             | 163 | 13          | 116        | 34              | 62       | 42  | 8  | 12 | 665       | 140   | 35  | 285     | 37  | 3   |
| RCX      | 111        | 0.1088235          | 68               |                 |     |             |            |                 |          |     |    |    |           |       |     |         |     |     |
| RCY      | 64         | 0.0627451          | 54               |                 |     |             |            |                 |          |     |    |    |           |       |     |         |     |     |
| Subtotal | 175        |                    | 122              |                 |     |             |            |                 |          |     |    |    |           |       |     |         |     |     |
| Total    | 1029       |                    | 878              |                 |     |             |            |                 |          |     |    |    |           |       |     |         |     |     |

\*CMA, Chromosome microarray analysis; TOP, termination of pregnancy; SB, stillbirth; CP, continue pregnancy; mat, maternal; pat, paternal
